# Supplementary material for: A general strategy to develop fluorogenic polymethine dyes for bioimaging
Source: PubMed Central journal article supplement (PMC10774129; doi:10.1038/s41557-023-01367-y), 2023-11-27

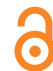

---

# A general strategy to develop fluorogenic polymethine dyes for bioimaging

---

In the format provided by the authors and unedited

## Table of Contents

|                                                     |    |
|-----------------------------------------------------|----|
| Supplementary Discussion 1 .....                    | 2  |
| Supplementary Discussion 2 .....                    | 6  |
| Supplementary Figures.....                          | 9  |
| Supplementary Tables.....                           | 13 |
| Synthetic procedures .....                          | 15 |
| <i>Synthesis of building blocks</i> .....           | 15 |
| <i>Synthesis of 5-endo-trig carbocyanines</i> ..... | 17 |
| <i>Synthesis of 5-exo-trig carbocyanines</i> .....  | 20 |
| <i>Click reactions</i> .....                        | 31 |
| <i>Supplementary Compounds</i> .....                | 36 |
| References .....                                    | 41 |
| NMR spectra.....                                    | 42 |
| Plasmid maps .....                                  | 74 |

## Supplementary Discussion 1

We have shown that compound **11**, a 5-*exo-trig* Cy5 with hydroxyethyl ring-closing moiety, has a very similar  $pK_a$  to HMSiR (5.7 for **11** vs 5.8 for HMSiR) and exhibits similar spontaneously blinking behavior.

Next, we investigated other ring-closing moieties used in fluorogenic rhodamines. We first opted for a carboxylic acid to generate tetramethylrhodamine (TAMRA)-like carbocyanines. We synthesized **S1** (Figure SD1), keeping the  $CF_3$  substituent present in compound **11**. Probe **S1** has a  $D_{50}$  value of 13, which is very similar to TAMRA, but exhibits no pH dependence.

These results indicated that a more stable ring was needed to increase fluorogenicity, thus, we next tried amides as ring-closing moieties. We transformed methyl ester **9d** into an *N*-methyl amide, clicked it to SNAP-tag azide, and evaluated the resulting probe **S3** in vitro and in live-cell imaging experiments. Probe **S3** has a  $pK_a$  value below 2 and a closed form that is stable at all measured polarities. We tested compound **S3** in live HeLa cells transfected with H2B-SNAPf-mTurquoise2 and observed very low non-specific fluorescence signal, but also only weak turn-on fluorescence in the nucleus upon SNAP-tag binding. Guided by our computational modeling, we hypothesized that the  $CF_3$  group shifts the equilibrium significantly towards the closed form. Its removal led to compound **15**, which we expected to be more prone to ring opening. Indeed, compound **15** shows a good compromise between a sufficiently stable closed form in solution ( $pK_a$  of 2.6 and no polarity dependence) with very low non-specific fluorescence signal, but a good turn-on upon binding to SNAP-tag.

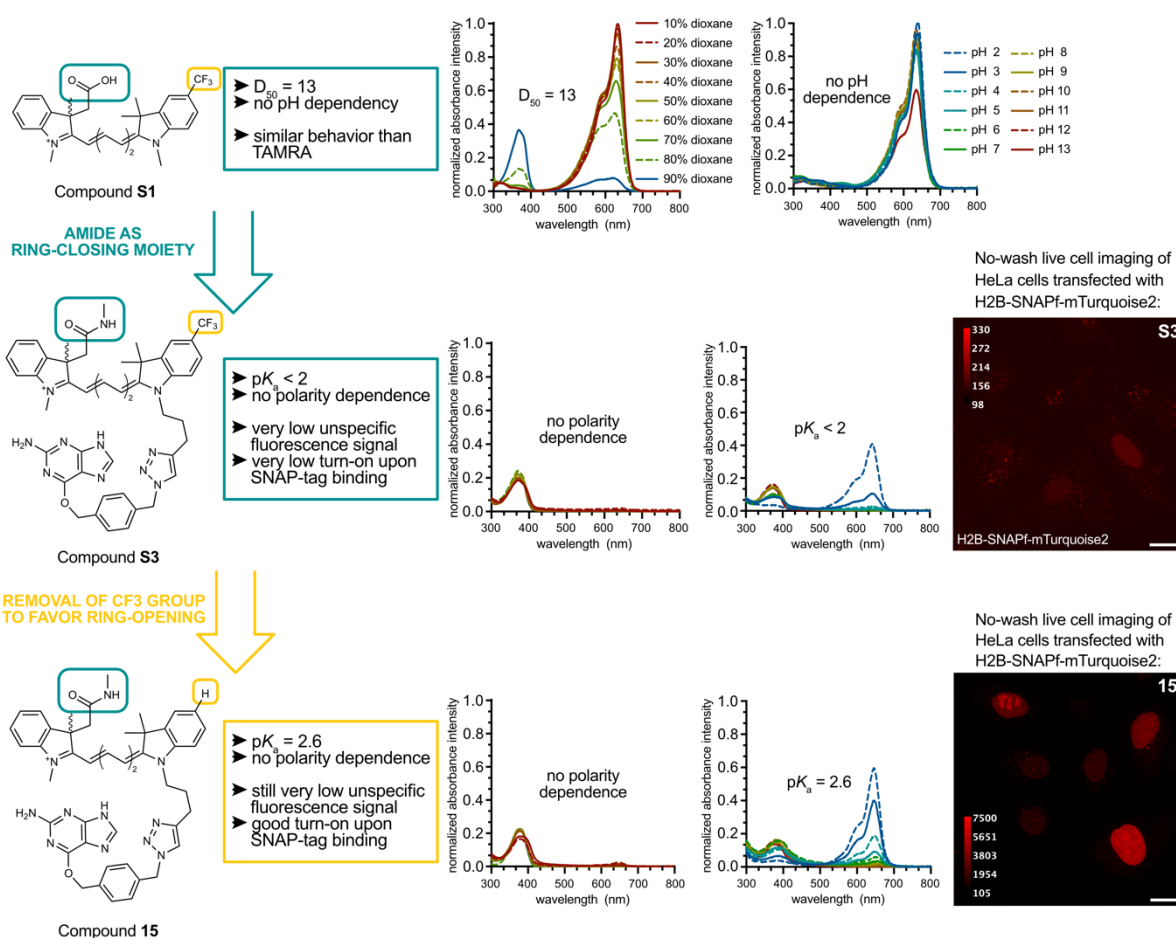

**Figure SD1.** Overview of the rational design of compound **15**.

The effect of the 5-*exo-trig* ring-closing strategy is clear when comparing the properties of compounds **15** and **16** (Figure SD2). 5-*endo-trig* compound **16** has a  $pK_a$  value of 9.4 (compound **15** has a  $pK_a$  value of 2.6) and remains in the open form regardless of polarity (compound **15** remains in the closed form regardless of polarity). Scale bar: 15  $\mu\text{m}$ . Spectra are representative from three independent experiments and micrographs are representative of three independent biological samples measured over three separate imaging sessions.

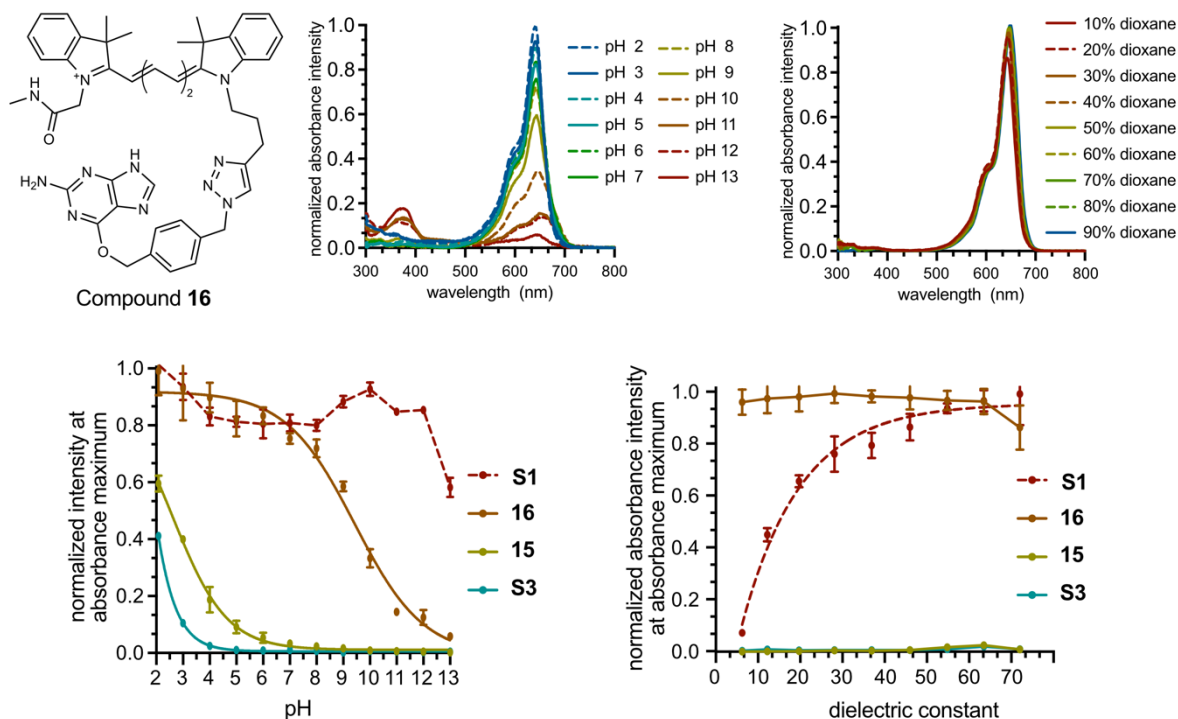

**Figure SD2.** pH and polarity profile of the corresponding 5-endo-trig compound **16** and summary of all Cy5 probes. Symbols indicate the mean of three independent experiments and error bars represent standard deviation. Spectra are representative from three independent experiments.

To design fluorogenic Cy3 and Cy7 derivatives, we suspected that the Cy3 derivative would have a higher LUMO energy, whereas the opposite would be true for the Cy7 derivative. Thus, we expected the Cy3 to have a higher tendency to exist in the open form than Cy5, and the Cy7 to have a higher tendency to exist in the closed form. Based on this assumption, we kept the  $\text{CF}_3$  group for our Cy3 design resulting in compound **19** (Figure SD3). Compound **19** has a  $\text{pK}_a$  value of 3.7, which is higher than that of **15**, and its closed form is stable at all measured polarities. In live-cell imaging experiments, this compound still shows only minimal lysosomal background and a good fluorescence turn-on upon SNAP-tag binding. These results demonstrate that Cy3 derivatives indeed have a higher intrinsic tendency to remain in the open form and thus strongly nucleophilic ring-closing moieties and electron-withdrawing substituents are needed for fluorogenicity.

In the case of our Cy7 design, we synthesized **S6**, which has a methyl amide as nucleophile and no  $\text{CF}_3$  group (Figure SD3). This compound has a closed form that is stable at all measured polarities and pH values. Compound **S6** displayed very low background in live-cell imaging, but also only a weak turn-on upon binding to SNAP-tag. Therefore, we decided to weaken the nucleophilicity of the ring-closing amide by introducing fluorine substituents, resulting in compound **20**. We note that an alternative strategy would be to introduce electron-donating substituents to the indolenine or polymethine chain.

Compound **20** has a  $pK_a$  value of 2.7 and a  $D_{50}$  value of approximately 52. It is noteworthy that the absorbance decreases in dioxane:water mixtures with >70% water content, possibly indicating aggregation in aqueous medium at the relatively high concentration of this experiment (10  $\mu$ M). In live-cell imaging experiments, **20** showed a good compromise between low non-specific background and fluorescence turn-on upon SNAP-tag binding. Since live-cell experiment were carried out at a much lower concentration (50 nM), we do not expect aggregation to play a significant role in fluorogenicity.

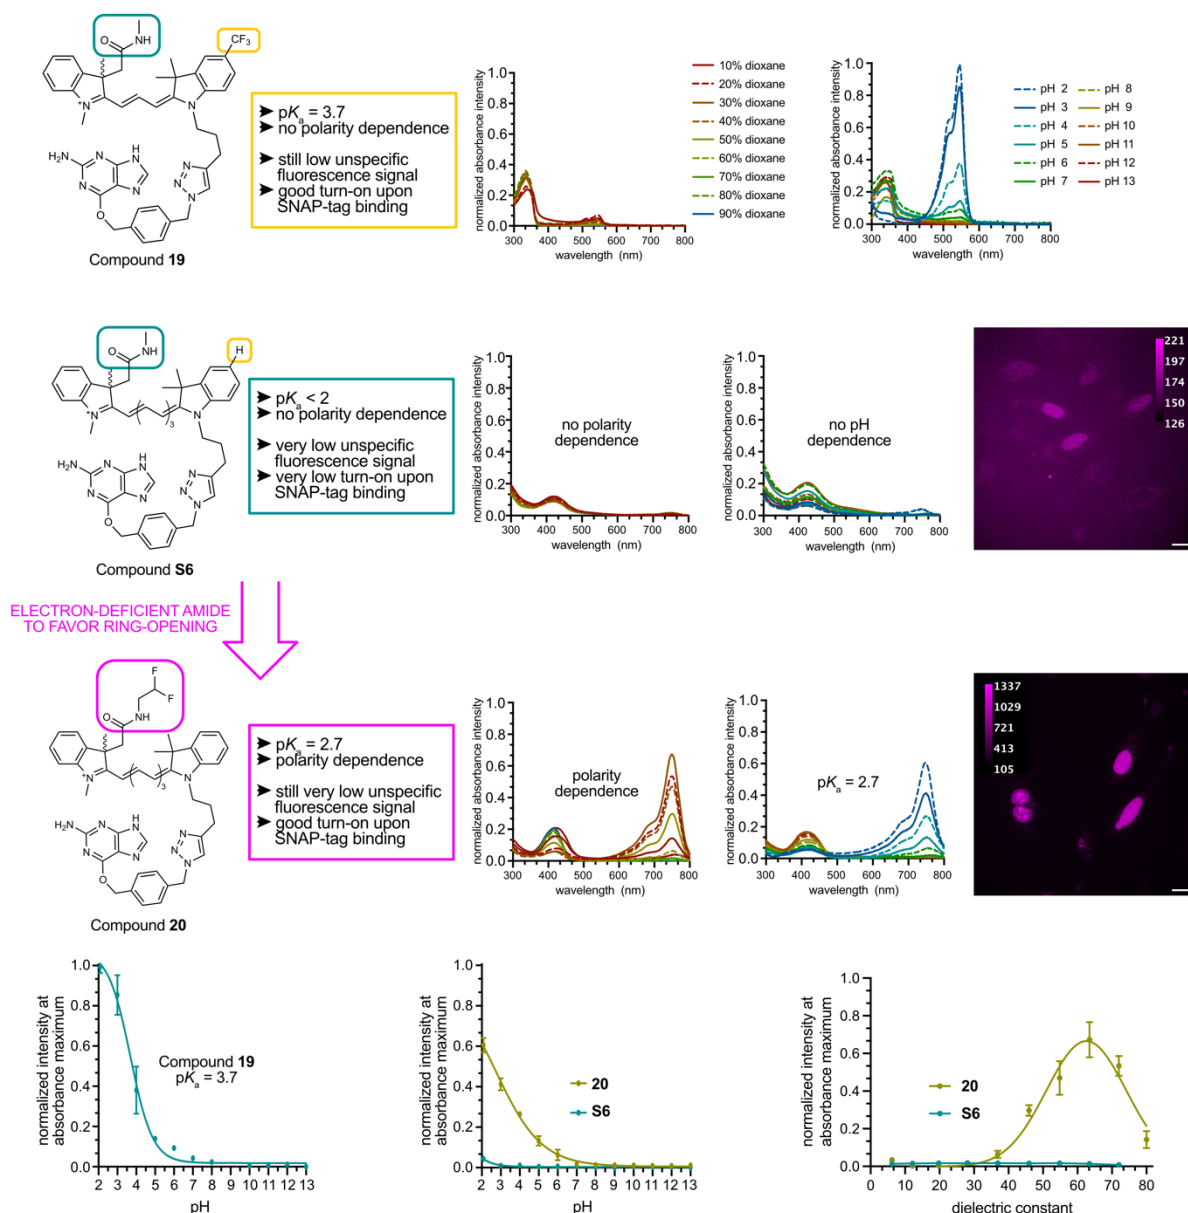

In summary, we illustrated that our *5-exo-trig* ring-closing strategy is general and robust. The cyclization equilibrium can be fine-tuned by varying substituents on the capping indoleninium, as well as by modifying the ring-closing group. In general, *5-exo-trig* dyes with  $pK_a$  values between 2.5 and 3.5 showed very low non-specific background in live HeLa cells and good turn-on upon SNAP-tag binding. Dyes with  $pK_a$  values below 2 showed only very little turn-on, and dyes with  $pK_a$  values above 4 are expected to show lysosomal background signal.

Further improvement of the dyes can be achieved by enhancing the photophysical properties of the dyes and optimizing the linker to the targeting moiety *via* chemical modifications, as well as by protein engineering to increase the interactions of the small molecule with the protein surface (see Supplementary Discussion 2) and to stabilize the open form.

## Supplementary Discussion 2

We have shown that carbocyanines with a *5-exo-trig* cyclization mechanism are largely present as non-fluorescent, cyclized forms in solution. In most cases, their  $pK_a$  of ring opening is rather low, and they are largely insensitive to changes in polarity. Naturally, the question of how they turn-on upon binding to their target arises. To provide preliminary insight into this process, we carried out molecular mechanics simulations of (S)-**15** and (S)-**18**-DNA bound to their targets.

### Method

For (S)-**15**, conformational searches were carried out using the crystal structure of SNAP-tag attached to a rhodamine ligand (PDB: 6Y8P). All calculations were carried out with the modules of the Schrödinger package, 2023-1 release. The protein structure was loaded onto Maestro and the atoms of the ligand (rhodamine) were deleted up to the benzyl group that is covalently attached to C145. Water molecules that had contacts to the ligand but not to the protein were removed as well. Compound (S)-**15**, either in the open or closed form, was built in a conformation that avoided obvious steric clashes and the conjugated  $\pi$ -system was roughly planar. The protein conjugate was prepared using the Protein Preparation Workflow of Maestro. The simulation was set up at pH = 7.4 and crystallographic water molecules farther than 5 Å from heteroatoms were removed. Other solvents (ethylene glycol) were also removed, but the bound Zn atom was kept. Hydrogens and lone pairs were added to the structure, which was subsequently optimized using the OPLS4 force field using water as solvent. A conformational search was set up by designating the ligand as freely moving atoms. A first shell of restricted residues was defined after considering the possible conformations of the ligand and residues within a distance of 5.0 Å of any of those conformations were restricted using a force constant of 200.0 kJ mol<sup>-1</sup> Å<sup>-2</sup>. This shell included residues E30, I32, F33, L34, G35, K36, H86, P87, V88, T95, K131, T132, A133, L134, S135, G136, N136, P138, P140, C145, H146, G157, Y158, E159, G160, G161, L162, and V164. All atoms in the protein further away from this shell were frozen. The conformational space of the ligand was searched using the torsional

sampling method (MCMM), taking 50 steps per rotational bond and saving structures within 10 kJ mol<sup>-1</sup> of the global minimum. The energy minimization of each structure was carried out using the OPLS4 force field, with water as solvent, using charges from force field and an extended cutoff. Minimization was carried out using the Polak-Ribier Conjugate Gradient method with 5000 maximum iterations and a converge threshold of 0.05 on gradient. Conformational searches were carried out equivalently for **18**-DNA bound to DNA using the crystal structure of Hoechst 33258 bound to dodecamer CGCGAATTCGCG (PDB: 1DNH).

## Results

The closed form of (*S*)-**15** binds to SNAP-tag in a way that the cyclic indolenine is positioned over the  $\beta$ -sheet formed between residues H29 and G35. About 10 conformations were found within 2 kcal mol<sup>-1</sup> of the global minimum, all of which were oriented in a similar way, but with different rotations around the bond that joins the cyclized indolenine with the polymethine chain (Figure SD4a). This distribution of conformers suggests that the closed indolenine can explore several binding poses, but the polymethine chain is relatively rigid. In one of the binding poses, we observed that the carbonyl of the lactam that cyclizes the indolenine forms a hydrogen bond with the backbone amide of K36, with a distance O–H = 1.93 Å (Figure SD4a, inset). An equivalent conformational search for the open form revealed that the open amide (formerly a lactam in the closed form) also forms a hydrogen bond to the backbone amide of K36, but with a shorter distance O–H = 1.75 Å (Figure SD4b), suggesting a stronger interaction that could be the driving force for ring opening. These results, albeit preliminary, suggest that specific interactions (e.g., hydrogen bonding) could be responsible for ring-opening in 5-*exo-trig* carbocyanines once that they are tightly bound to a macromolecule.

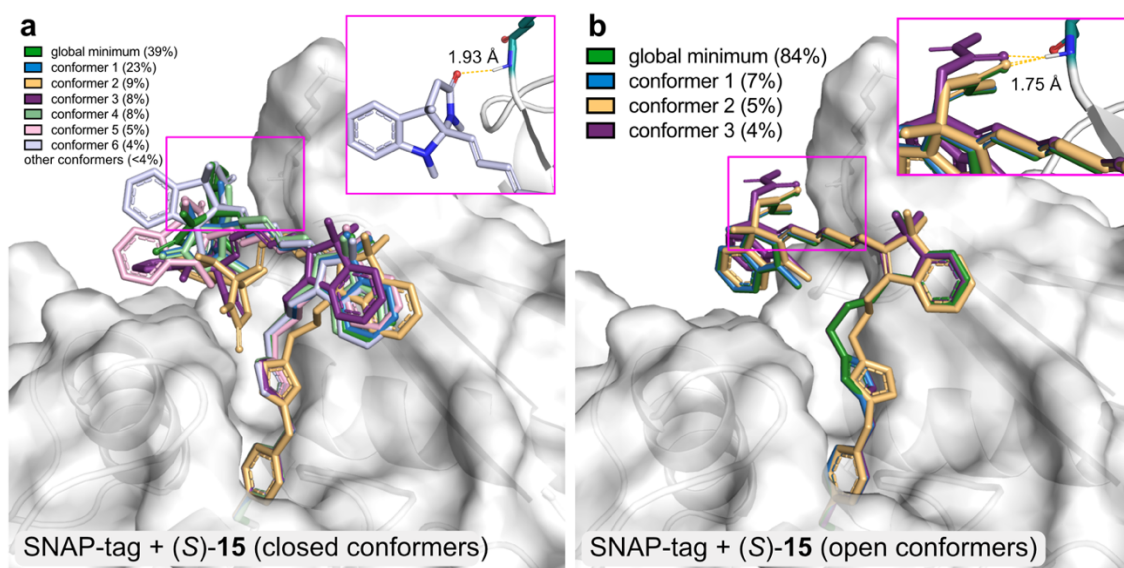

**Figure SD4.** Calculated low-energy conformers of compound (*S*)-**15** bound to SNAP-tag. a) Ensemble of conformers of the closed (a) and open (b) forms of compound (*S*)-**15** bound to SNAP-tag.



To investigate whether such interactions were also observed in other macromolecules, we performed an equivalent conformational search of (S)-**18**-DNA bound to dsDNA. As mentioned before, the starting point for this calculation was the crystal structure of Hoechst 33258 bound to dodecamer CGCGAATTCGCG (PDB: 1DNH).

In this case, all conformations found within 2 kcal mol<sup>-1</sup> of the global minimum were identical both for the open and closed forms. The closed form adopted a pose in which the lactam of the cyclized indolenine point out into the solvent and does not have any specific interactions with DNA (Figure SD5a, pale cyan structure). In contrast, in the open form, the acyclic amide can form a hydrogen bond with a phosphate of the DNA backbone (Figure SD5a, magenta structure). The O–H distance of this interaction is 1.80 Å (Figure SD5b). Similar to what was observed for (S)-**15** and SNAP-tag, a specific interaction (hydrogen bonding) seems to be plausible way in which the open, fluorescent, form of these molecules is stabilized upon tight binding to a macromolecular target.

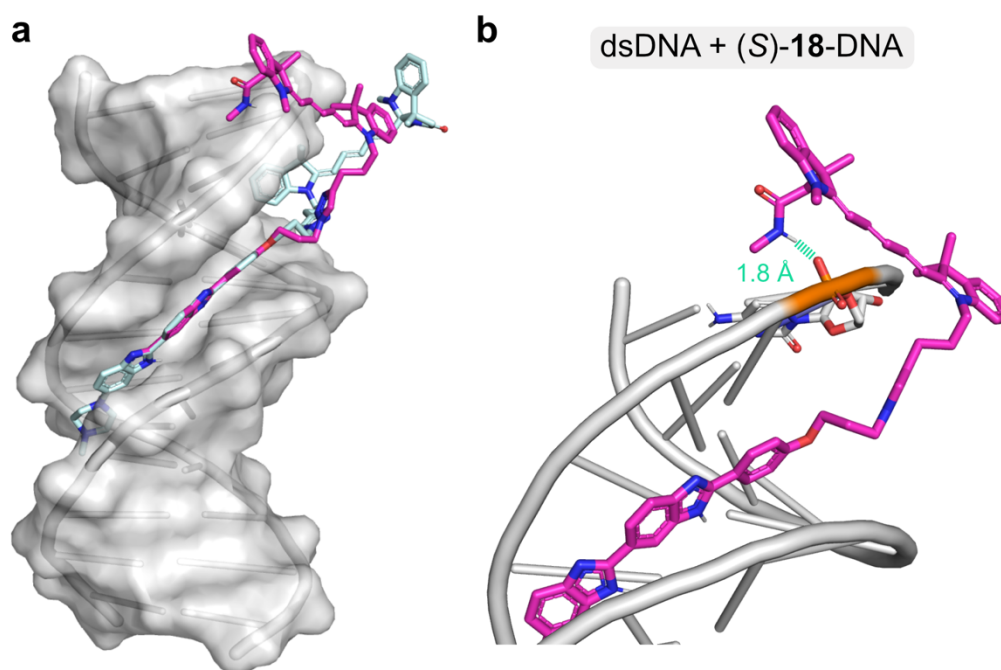

**Figure SD5.** Structures of (S)-**18**-DNA bound to dsDNA. a) Conformations of the global minima calculated for the open (magenta) and closed (pale cyan) forms of (S)-**18**-DNA bound to dsDNA. b) Hydrogen bonding between the acyclic amide in the open form of (S)-**18**-DNA and a backbone phosphate group in DNA.

Clearly, these results are only preliminary and a future investigation of the mechanism of fluorogenicity would require full molecular dynamics simulations with explicit solvent molecules, quantum mechanics/molecular mechanics (QM/MM) calculations of the ring-opening process, and experimental mutagenesis experiments to probe the importance of the interactions identified computationally.

## Supplementary Figures

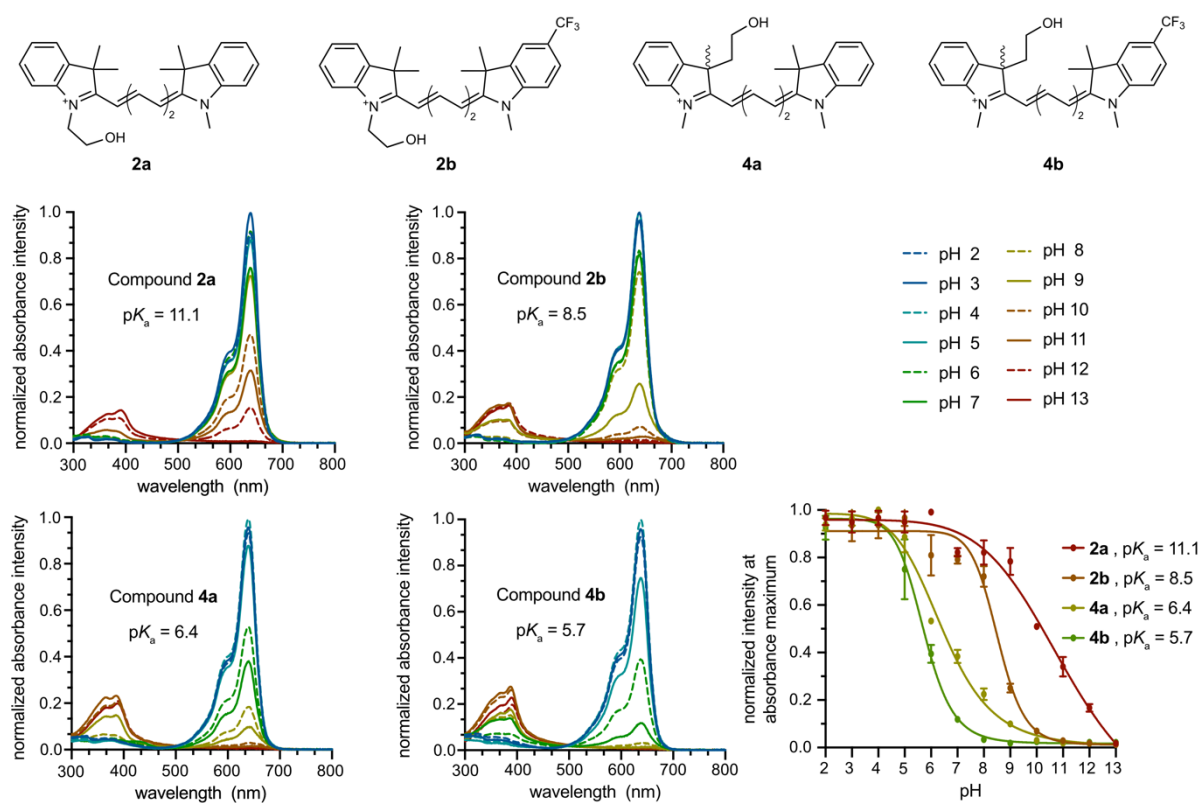

**Figure 1.** pH profiles of compounds with an alcohol as ring-closing moiety. Symbols indicate the mean of three independent experiments and error bars represent standard deviation. Spectra are representative from three independent experiments.

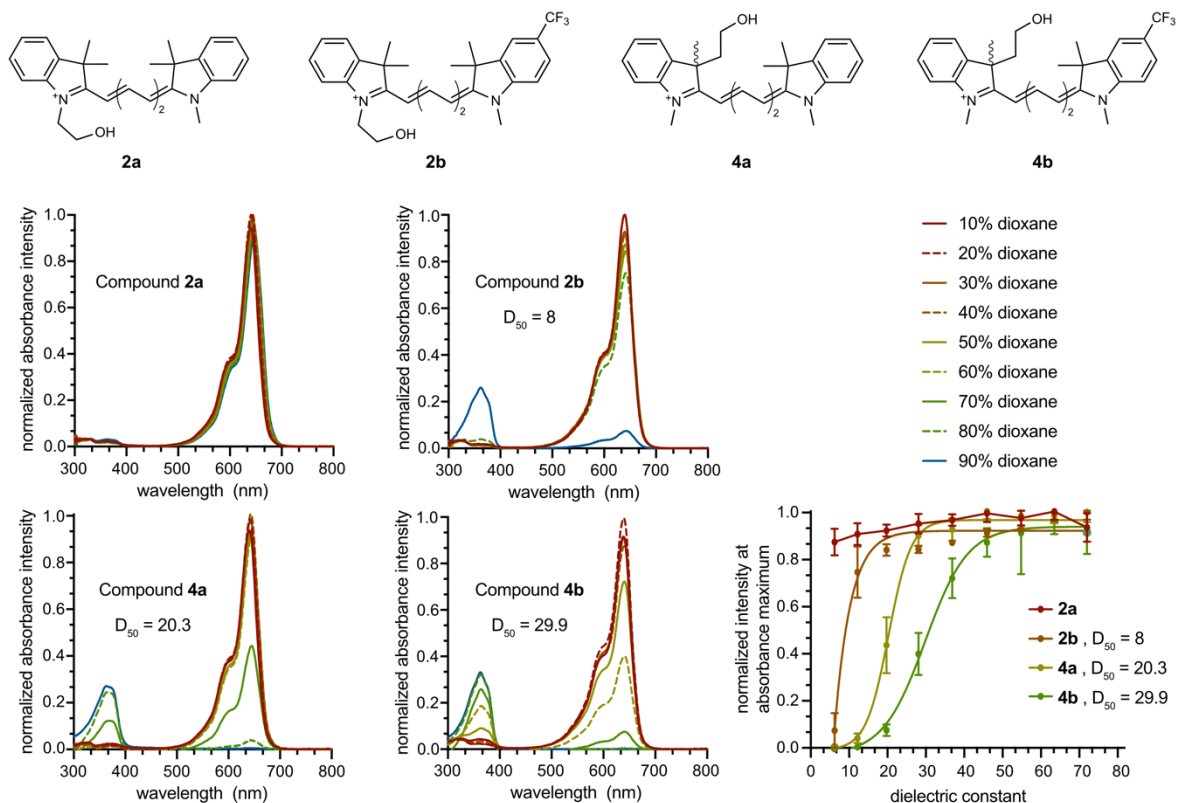

**Figure 2.** polarity profiles of compounds with an alcohol as ring-closing moiety. Symbols indicate the mean of three independent experiments and error bars represent standard deviation. Spectra are representative from three independent experiments.

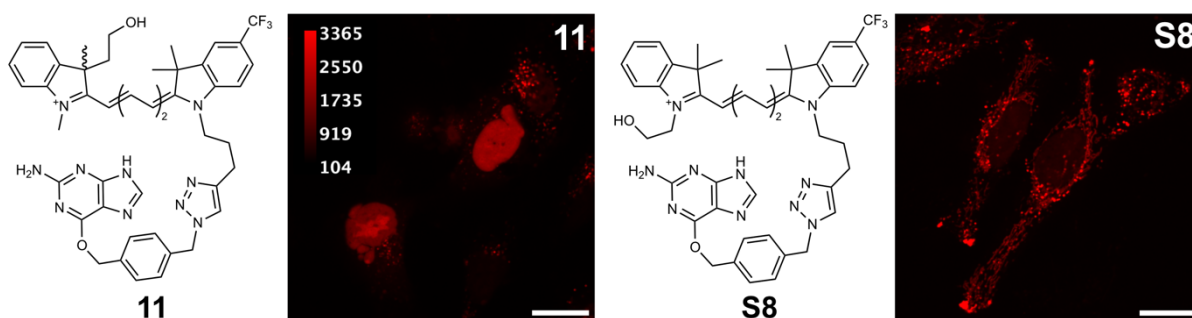

**Figure 3.** Comparison of cellular uptake of compounds 5-*exo* trig and 5-*endo*-trig compounds. No-wash live-cell imaging of HeLa cells transfected with H2B-SNAPf-mTurquoise2 and incubated with **11** (50 nM) or **S8** (50 nM). Since probe **11** has a pK<sub>a</sub> value of 5.7 and compound **S8** has a pK<sub>a</sub> value of 8.5, their similar fluorescence intensities in acidic vesicles (pH of 4–5) suggest comparable cellular uptake. Scale bar = 15 μm. Micrographs are representative of three independent biological samples measured over three separate imaging sessions.

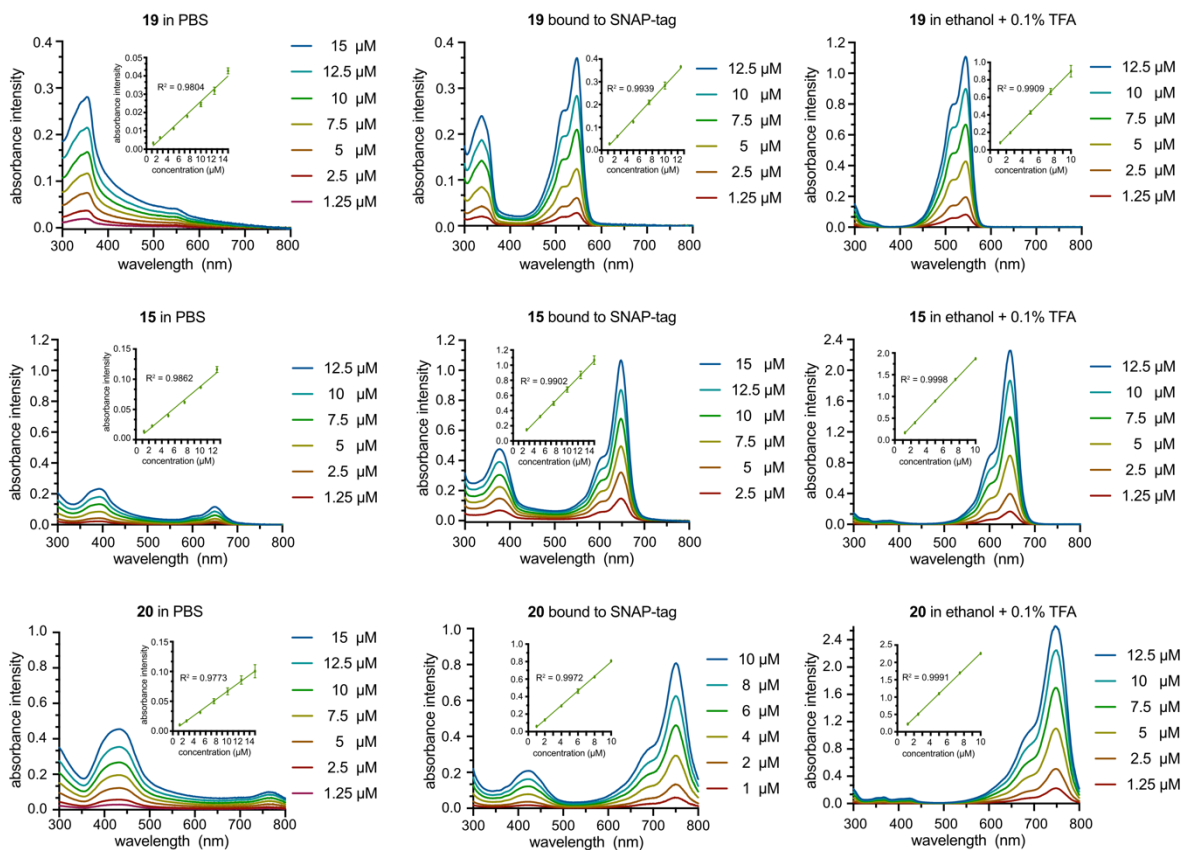

**Figure 4.** Full absorbance spectra of extinction coefficient measurements of **15**, **19** and **20** in PBS, bound to SNAP-tag protein and in ethanol + 0.1% TFA. Spectra are representative from three independent experiments.

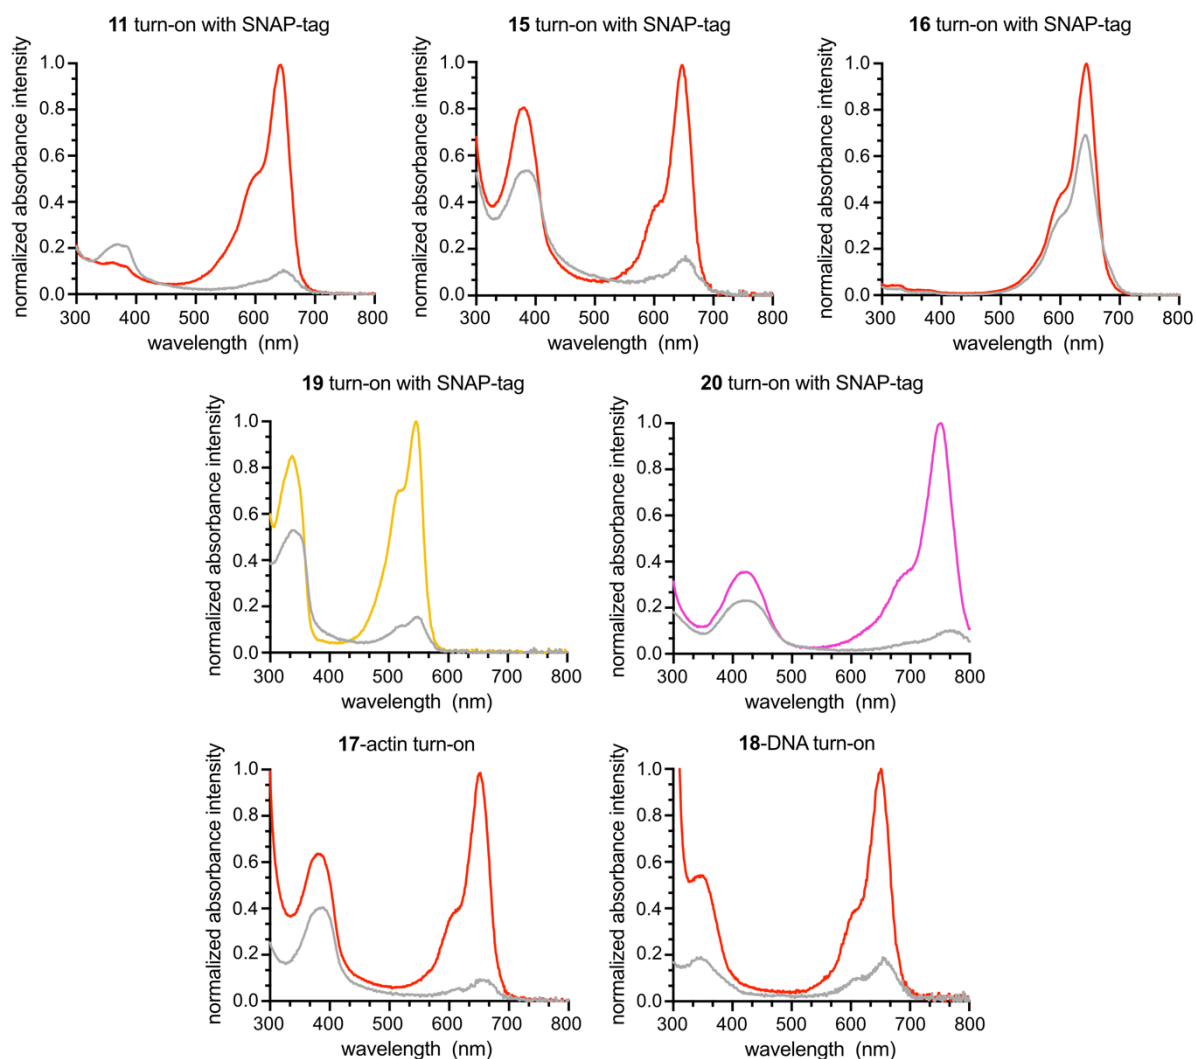

**Figure 5.** Absorbance spectra of **11**, **15**, **16**, **19** and **20** with SNAP-tag protein, **17**-actin with actin and **18**-DNA with ds-DNA in the range 300–800 nm. Spectra are representative of three independent experiments. Grey lines indicate absorbance of free dye and colored lines indicate absorbance of the dye-macromolecule conjugate.

## Supplementary Tables

**Table 1.** Calculated energies of the open and closed form of **1**, **2**, **3**, **4a**, **4b** and of the transition state of ring closure using DFT theory, B3LYP or M06-2X functional and the DGTZVP basis set. Energy values are reported in kcal mol<sup>-1</sup>.

| Probe       | closed form  | open form    | transition state |
|-------------|--------------|--------------|------------------|
| 1 (B3LYP)   | -930591.73   | -930566.39   | -930563.39       |
| 2 (B3LYP)   | -797468.7184 | -797455.0657 | -797449.7312     |
| 3 (B3LYP)   | -822124.75   | -822108.05   | -822102.69       |
| 4a (B3LYP)  | -797472.89   | -797446.15   | -797441.7        |
| 4b (B3LYP)  | -1009053.449 | -1009023.302 | -1009020.434     |
| 1 (M06-2X)  | -930256.9573 | -930219.9555 | -930216.4001     |
| 2 (M06-2X)  | -797134.25   | -797104.38   | -797103.34       |
| 3 (M06-2X)  | -821779.50   | -821747.81   | -821745.36*      |
| 4a (M06-2X) | -797137.69   | -797096.93   | -797094.28       |
| 4b (M06-2X) | -1008650.22  | -1008608.32  | -1008605.57      |

\*For the calculation of this transition state, the following Gaussian command was used:  
opt=(calcf,ts,noigentest)

**Table 2.** Plasmid sources.

| Plasmid                       | Source                       | Vector precursor      | Insert precursor     |
|-------------------------------|------------------------------|-----------------------|----------------------|
| pET24b-6His-fSNAP             | Addgene #106999              |                       |                      |
| pSNAPf-H2B                    | Addgene #101124              |                       |                      |
| pEBTet- $\beta$ -tubulin_SNAP | Addgene #136831              |                       |                      |
| pmTurquoise2-Golgi            | Addgene #36205               |                       |                      |
| pmTurquoise2-ER               | Addgene #36204               |                       |                      |
| pmTurquoise2-Mito             | Addgene #36208               |                       |                      |
| LifeAct-Halo-T2A-eGFP         | Addgene #135445              |                       |                      |
| TOM20-Halo-T2A-eGFP           | Addgene #135443              |                       |                      |
| TUBB5-Halo                    | Addgene #64691               |                       |                      |
| SNAPf-mTurquoise2             | Gibson assembly <sup>1</sup> | pmTurquoise2-Golgi    | pSNAPf-H2B           |
| H2B-SNAPf-mTurquoise2         | Gibson assembly <sup>1</sup> | pmTurquoise2-Golgi    | pSNAPf-H2B           |
| SNAPf-mTurquoise2-KDEL        | Gibson assembly <sup>1</sup> | pmTurquoise2-ER       | pSNAPf-H2B           |
| LifeAct-SNAPf-mTurquoise2     | Gibson assembly <sup>1</sup> | H2B-SNAPf-mTurquoise2 | LifeAct-HT7-T2A-eGFP |
| TOM20-SNAPf-mTurquoise2       | Gibson assembly <sup>1</sup> | H2B-SNAPf-mTurquoise2 | TOM20-HT7-T2A-eGFP   |

**Table 3.** List of primers for Gibson Assembly.

| Plasmid                           | backbone<br>forward primer  | backbone<br>reverse primer         | fragment<br>forward primer        | fragment<br>reverse primer       |
|-----------------------------------|-----------------------------|------------------------------------|-----------------------------------|----------------------------------|
| SNAPf-<br>mTurquoise2             | GAGGT TAATG<br>TGAGC AAGGGC | TTTGT CCATT<br>GA GTC CGGTA<br>GCG | CGGAC TCAAT<br>GGACA AAGAC<br>TGC | CCTTG CTCAC<br>ATTAA CCTCG<br>AG |
| H2B-SNAPf-<br>mTurquoise2         | GAGGT TAATG<br>TGAGC AAGGGC | TCTGG CATTG<br>AGTCC GGTAGC        | CGGAC TCAAT<br>GCCAG AGCCA        | CCTTG CTCAC A<br>TTAA CCTCGAG    |
| SNAPf-<br>mTurquoise2-<br>KDEL    | GAGGT TAATG<br>TGAGC AAGGGC | GTCTT TGTCC<br>ATGGT GGCGAC        | CCACC ATGGA<br>CAAAG ACTGC        | CCTTG CTCAC<br>ATTAA CCTCG<br>AG |
| LifeAct-<br>SNAPf-<br>mTurquoise2 | CGGTA CTGCG<br>CCAGC ATTT   | CCACG CCCAT<br>TGAGT CCGG          | CTCAA TGGGC<br>GTGGC CGAC         | GCTGG CGCAG<br>TACCG ATTTCTG     |
| TOM20-<br>SNAPf-<br>mTurquoise2   | TGTGG AAGCG<br>CCAGC ATTT   | CCCAC CATTG<br>AGTCC GGTAG         | GGACT CAATG<br>GTGGG TCGG         | GCTGG CGCTT<br>CCACA TCATCT      |

**Table 4.** Characterization of SNAP-conjugated fluorogenic dyes.

| SNAP-dye           | $\lambda_{ex}/\lambda_{em}$ | $\epsilon$ [ $\times 10^4 \text{ M}^{-1}\text{cm}^{-1}$ ] | $\phi$                                                  |
|--------------------|-----------------------------|-----------------------------------------------------------|---------------------------------------------------------|
| Cy3-SNAP <b>19</b> | 545/567                     | 0.3 <sup>a</sup> / 3.0 <sup>b</sup> / 9.4 <sup>c</sup>    | — <sup>a</sup> /0.16 <sup>b</sup> /0.04 <sup>c</sup>    |
| Cy5-SNAP <b>15</b> | 644/672                     | 0.9 <sup>a</sup> / 7.3 <sup>b</sup> / 19.6 <sup>c</sup>   | 0.16 <sup>a</sup> /0.46 <sup>b</sup> /0.28 <sup>c</sup> |
| Cy7-SNAP <b>20</b> | 749/784                     | 0.7 <sup>a</sup> / 8.3 <sup>b</sup> / 23.4 <sup>c</sup>   | 0.03 <sup>a</sup> /0.33 <sup>b</sup> /0.16 <sup>c</sup> |

a: PBS, b: bound to SNAP-tag protein in PBS, c: ethanol + 0.1% TFA

**Table 5.** Microscope settings for imaging channels.

| Channel     | $\lambda_{ex}$ | Emission filter | Laser intensity | Exposure time |
|-------------|----------------|-----------------|-----------------|---------------|
| mTurquoise2 | 445 nm         | 472/30          | 30 mW           | 300 ms        |
| Cy3, JF549  | 561 nm         | 600/52          | 23 mW           | 300 ms        |
| Cy5, JF646  | 638 nm         | 708/75          | 25 mW           | 400 ms        |
| Cy7         | 638 nm         | 647LP           | 25 mW           | 400 ms        |

## Synthetic procedures

### Synthesis of building blocks

Building blocks **5**, **7a**, **7b**, **8** and **13** were prepared according to previously reported methods.<sup>2-4</sup>

### 3-(Carboxymethyl)-1,2,3-trimethyl-3*H*-indol-1-ium bromide<sup>2</sup> (**6**)

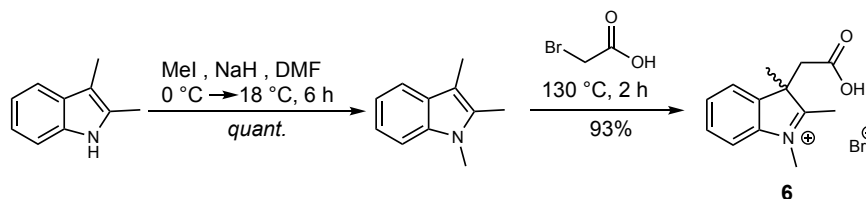

Sodium hydride (60% dispersion in mineral oil, 7.3 g, 183 mmol, 2.6 equiv.) was added to a flame-dried round-bottom flask, cooled to 0 °C and carefully dissolved in DMF (50 mL). 2,3-dimethylindole (10 g, 68.9 mmol, 1.0 equiv.) was added portion-wise at 0 °C followed by the addition of iodomethane (5.6 mL, 89.5 mmol, 1.3 equiv.). After stirring at 0 °C for 1 h, the suspension was warmed to room temperature and stirred for 4 h. The mixture was cooled to 0 °C and cold water (25 mL) was added dropwise. The mixture was extracted twice with ethyl acetate and the organic phase was washed with brine, dried over Na<sub>2</sub>SO<sub>4</sub> and filtered. Solvents were removed under reduced pressure to afford 1,2,3-trimethyl-1*H*-indole as a dark orange oil, which was used directly without further purification.

Bromoacetic acid (28.8 g, 207 mmol, 3.0 equiv.) was slowly melted in a flame-dried flask (45-50 °C) under argon atmosphere. 1,2,3-trimethyl-1*H*-indole (11 g, 69.1 mmol, 1.0 equiv.) was added and the mixture was heated to 130 °C for 2 h. The mixture was slowly cooled to 18 °C and the residue was washed twice with diethyl ether and CH<sub>2</sub>Cl<sub>2</sub>. Acetonitrile was added and the suspension was left in the fridge for 1 h. The beige precipitate was collected by filtration and washed with diethyl ether to afford the product as a beige solid (19.1 g, 93%). The racemic mixture was then separated on a ChiralPak IJ column using 100% EtOH + 0.1% FA as mobile phase.

(*R*)-(+)-**6**:  $[\alpha]_{589}^{296K} = +74^\circ \pm 2^\circ$ , ( $c = 6.0 \text{ mg mL}^{-1}$ , CH<sub>3</sub>OH).

(*S*)-(–)-**6**:  $[\alpha]_{589}^{297K} = -64^\circ \pm 3^\circ$ , ( $c = 6.0 \text{ mg mL}^{-1}$ , CH<sub>3</sub>OH).

<sup>1</sup>H NMR (400 MHz, CD<sub>3</sub>OD):  $\delta = 7.83$  (dd,  $J = 6.6, 2.5$  Hz, 1H), 7.79 – 7.77 (m, 1H), 7.68 – 7.61 (m, 2H), 4.07 (s, 3H), 3.58 (d,  $J = 17.5$  Hz, 1H), 3.50 (d,  $J = 17.5$  Hz, 1H), 1.56 (s, 3H) ppm.

<sup>13</sup>C{<sup>1</sup>H} NMR (101 MHz, CD<sub>3</sub>OD):  $\delta = 196.1, 171.2, 143.0, 139.5, 129.5, 129.4, 122.9, 114.67, 55.6, 40.9, 33.6, 20.7$  ppm.

HRMS (ESI) calcd for [C<sub>13</sub>H<sub>16</sub>NO<sub>2</sub>]<sup>+</sup>: 218.11810, found 218.11770.



### 2,3,3-Trimethyl-1-(pent-4-yn-1-yl)-3*H*-indol-1-ium iodide (7c)

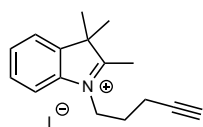

5-iodo-pent-1-yne was prepared according to previously reported methods.<sup>5</sup> 2,3,3-trimethylindolenine (200  $\mu$ L, 1.26 mmol, 1.0 equiv.) and 5-iodo-pent-1-yne (731 mg, 3.77 mmol, 3.0 equiv.) were dissolved in  $\text{CH}_3\text{CN}$  (5 mL) and heated under reflux for 16 h. Solvents were removed under reduced pressure and the residue was washed with diethyl ether multiple times to yield a pale pink solid (389 mg, 88%).

$^1\text{H}$  NMR (400 MHz,  $(\text{CD}_3)_2\text{SO}$ ):  $\delta$  = 7.99 – 7.96 (m, 1H), 7.87 – 7.84 (m, 1H), 7.64 – 7.62 (m, 2H), 4.51 (t,  $J$  = 7.7 Hz, 2H), 2.95 (t,  $J$  = 2.7 Hz, 1H), 2.86 (s, 3H), 2.43 (td,  $J$  = 7.2, 2.7 Hz, 2H), 2.07 (p,  $J$  = 7.2 Hz, 2H), 1.55 (s, 6H) ppm.

$^{13}\text{C}\{^1\text{H}\}$  NMR (101 MHz,  $(\text{CD}_3)_2\text{SO}$ ):  $\delta$  = 197.0, 141.8, 141.1, 129.4, 128.9, 123.5, 115.2, 83.1, 72.4, 54.3, 46.8, 26.0, 22.0, 15.2, 14.2 ppm.

HRMS (ESI) calcd for  $[\text{C}_{16}\text{H}_{20}\text{N}]^+$ : 226.15958, found 226.15904.

### 2,3,3-Trimethyl-1-(pent-4-yn-1-yl)-5-(trifluoromethyl)-3*H*-indol-1-ium iodide (7d)

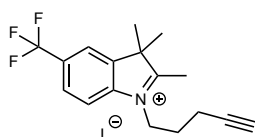

2,3,3-trimethyl-5-(trifluoromethyl)-3*H*-indole was prepared according to previously reported methods.<sup>6</sup> 2,3,3-trimethyl-5-(trifluoromethyl)-3*H*-indole (850 mg, 3.74 mmol, 1.0 equiv.) and 5-iodo-pent-1-yne (1.81 g, 9.35 mmol, 2.5 equiv.) were dissolved in  $\text{CH}_3\text{CN}$  (10 mL) and heated under reflux for 36 h. Solvents were removed under reduced pressure and the residue was washed with diethyl ether multiple times to yield the product as a pale purple solid (580 mg, 37%).

$^1\text{H}$  NMR (400 MHz,  $\text{CD}_3\text{CN}$ ):  $\delta$  = 8.08 (s, 1H), 7.98 – 7.93 (m, 2H), 4.48 (t,  $J$  = 7.8 Hz, 2H), 2.81 (s, 3H), 2.42 (td,  $J$  = 6.9, 2.7 Hz, 2H), 2.35 (t,  $J$  = 2.7 Hz, 1H), 2.14 (p,  $J$  = 7.3 Hz, 2H), 1.59 (s, 6H).

$^{13}\text{C}\{^1\text{H}\}$  NMR (101 MHz,  $\text{CD}_3\text{CN}$ ):  $\delta$  = 160.3 (q,  $J$  = 37.1 Hz), 145.0, 143.8, 127.9 (q, 3.8 Hz), 126.2, 123.5, 122.1 (q, 3.8 Hz), 117.2, 115.6, 83.2, 71.8, 56.3, 48.5, 27.0, 22.5, 16.3.

HRMS (ESI) calcd for  $[\text{C}_{17}\text{H}_{19}\text{F}_3\text{N}]^+$ : 294.14696, found 294.14606.

## 6-((4-(Aminomethyl)benzyl)oxy)-9H-purin-2-amine-6-((4-(azidomethyl)benzyl)oxy)-9H-purin-2-amine (10)

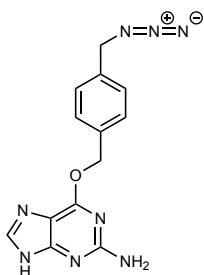

SNAP-amine<sup>7</sup> and FSO<sub>2</sub>N<sub>3</sub><sup>8</sup> were prepared according to previously reported methods. SNAP-amine (30 mg, 0.11 mmol, 1.0 equiv.) was dissolved in DMF/MTBE/H<sub>2</sub>O (94:5:1, 1.5 mL) and FSO<sub>2</sub>N<sub>3</sub> solution (1.35 equiv., 307 μL of a 488 mM solution) and aqueous potassium hydrogen carbonate solution (3 M, 1.5 mL) were added. The mixture was stirred for 3 h at 18 °C. Ethyl acetate was added and the organic phase was washed trice with brine, once with water and again with brine. The extracted organic phase was dried over Na<sub>2</sub>SO<sub>4</sub>, filtered, and solvents were removed under reduced pressure to yield the product as an off-white solid (32 mg, 97%).

<sup>1</sup>H NMR (400 MHz, (CD<sub>3</sub>)<sub>2</sub>SO): δ = 12.43 (s, 1H), 7.82 (s, 1H), 7.54 (d, *J* = 8.1 Hz, 2H), 7.40 (d, *J* = 8.2 Hz, 2H), 6.29 (s, 2H), 5.49 (s, 2H), 4.46 (s, 2H) ppm.

<sup>13</sup>C{<sup>1</sup>H} NMR (101 MHz, (CD<sub>3</sub>)<sub>2</sub>SO): δ = 159.6, 136.7, 135.4, 129.0, 128.7, 128.54, 128.50, 128.4, 66.3, 53.3 ppm.

HRMS (ESI) calcd for [C<sub>13</sub>H<sub>12</sub>N<sub>8</sub>O+H]<sup>+</sup>: 297.12068, found 297.12043.

## Synthesis of 5-endo-trig carbocyanines

### General procedure to synthesize 5-endo-trig hydroxyethyl probes 2a and 2b

Compound **5** (50 mg, 0.15 mmol, 1.0 equiv.) and **8** (45 mg, 0.18 mmol, 1.2 equiv.) were dissolved in Ac<sub>2</sub>O (1 mL) in a microwave vial. The solution was heated to 120 °C for 1 h in the microwave. The mixture was cooled to room temperature and a solution of **7** (0.17 mmol, 1.1 equiv.) in pyridine (1 mL) was added dropwise. The mixture was stirred for 30 min at 18 °C. The color of the solution turned from green to blue. Solvents were removed under reduced pressure. The residue was washed with diethyl ether and then stirred in a mixture of CH<sub>3</sub>OH (2 mL) and saturated K<sub>2</sub>CO<sub>3</sub> (3 mL) for 2 h at 18 °C to deprotect the acetylated alcohol. Solvents were removed under reduced pressure and the residue was dissolved in CH<sub>2</sub>Cl<sub>2</sub> and washed three times with water and twice with brine. The organic layer was dried over Na<sub>2</sub>SO<sub>4</sub>, filtered, and purified via reverse-phase column chromatography (10 → 70% CH<sub>3</sub>CN in ddH<sub>2</sub>O + 0.1% TFA over 35 min) to afford the product as a fine blue powder.

**1-(2-Hydroxyethyl)-3,3-dimethyl-2-((1E,3E)-5-((E)-1,3,3-trimethylindolin-2-ylidene)-penta-1,3-dien-1-yl)-3H-indol-1-ium 2,2,2-trifluoroacetate (2a)**

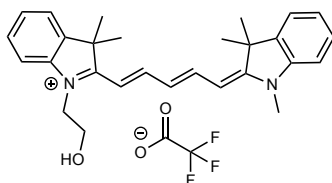

Yield: 54 mg, 68%

$^1\text{H}$  NMR (400 MHz,  $\text{CD}_3\text{OD}$ ):  $\delta$  = 8.23 (td,  $J$  = 13.2 Hz, 5.4 Hz, 2H), 7.47 (d,  $J$  = 7.4 Hz, 2H), 7.40 (q,  $J$  = 7.6 Hz, 7.1 Hz, 2H), 7.33 – 7.22 (m, 4H), 6.59 (t,  $J$  = 12.4 Hz, 1H), 6.35 (d,  $J$  = 13.7 Hz, 1H), 6.25 (d,  $J$  = 13.7 Hz, 1H), 4.23 (t,  $J$  = 5.4 Hz, 2H), 3.94 (t,  $J$  = 5.4 Hz, 2H), 3.61 (s, 3H), 1.74 (s, 6H), 1.72 (s, 6H) ppm.

$^{13}\text{C}\{^1\text{H}\}$  NMR (101 MHz,  $\text{CD}_3\text{OD}$ ):  $\delta$  = 175.7, 175.2, 155.5, 155.4, 155.3, 155.2, 144.3, 144.1, 142.6, 142.5, 129.7, 129.6, 126.2, 126.2, 126.2, 123.3, 123.3, 112.4, 111.8, 60.0, 50.6, 50.4, 47.7, 31.4, 28.0, 27.8 ppm.

HRMS (ESI) calcd for  $[\text{C}_{28}\text{H}_{33}\text{N}_2\text{O}]^+$ : 413.25874, found 413.25813.

**1-(2-Hydroxyethyl)-3,3-dimethyl-2-((1E,3E)-5-((E)-1,3,3-trimethyl-5-(trifluoromethyl) indolin-2-ylidene)penta-1,3-dien-1-yl)-3H-indol-1-ium 2,2,2-trifluoroacetate (2b)**

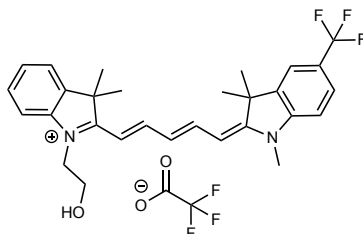

Yield: 71 mg, 79%

$^1\text{H}$  NMR (400 MHz,  $\text{CD}_3\text{OD}$ ):  $\delta$  = 8.31 (t,  $J$  = 13.1 Hz, 1H), 8.19 (t,  $J$  = 13.1 Hz, 1H), 7.69 (s, 1H), 7.65 (d,  $J$  = 10.0 Hz, 1H), 7.54 (d,  $J$  = 7.4 Hz, 1H), 7.47 – 7.41 (m, 2H), 7.37 – 7.31 (m, 1H), 7.27 (d,  $J$  = 8.3 Hz, 1H), 6.63 (t,  $J$  = 12.4 Hz, 1H), 6.54 (d,  $J$  = 14.2 Hz, 1H), 6.14 (d,  $J$  = 13.3 Hz, 1H), 4.33 (t,  $J$  = 5.3 Hz, 2H), 3.98 (t,  $J$  = 5.3 Hz, 2H), 3.53 (s, 3H), 1.76 (s, 6H), 1.73 (s, 6H) ppm.

$^{13}\text{C}\{^1\text{H}\}$  NMR (101 MHz,  $\text{CD}_3\text{OD}$ ):  $\delta$  = 178.8, 172.7, 157.2, 154.0, 147.7, 143.7, 143.3, 142.7, 129.8, 127.6, 127.5, 127.3 (q,  $J$  = 3.9 Hz), 126.7 (q,  $J$  = 32.6 Hz), 125.9 (q,  $J$  = 270.8 Hz), 123.5, 120.3 (q,  $J$  = 3.7 Hz), 113.5, 110.9, 107.6, 103.5, 60.2, 51.6, 51.5, 49.6, 48.3, 27.9, 27.7 ppm.

HRMS (ESI) calcd for  $[\text{C}_{29}\text{H}_{32}\text{F}_3\text{N}_2\text{O}]^+$ : 481.24612, found 481.24606.

**2-((1*E*,3*E*)-5-((*E*)-3,3-Dimethyl-1-(pent-4-yn-1-yl)indolin-2-ylidene)penta-1,3-dien-1-yl)-3,3-dimethyl-1-(2-(methylamino)-2-oxoethyl)-3*H*-indol-1-ium 2,2,2-trifluoroacetate (**14**)**

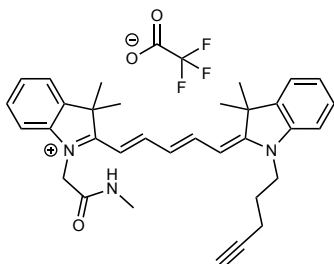

Compound **12** (100 mg, 0.28 mmol, 1.0 equiv.) and **8** (86 mg, 0.34 mmol, 1.2 equiv.) were dissolved in Ac<sub>2</sub>O (2 mL) in a microwave vial. The solution was heated to 120 °C for 1 h in the microwave. The mixture was cooled to room temperature and a solution of **7c** (108 mg, 0.31 mmol, 1.1 equiv.) in pyridine (2 mL) was added dropwise. The mixture was stirred for 30 min at 18 °C. Solvents were removed under reduced pressure and the residue was purified via reverse phase column chromatography (10 → 70% CH<sub>3</sub>CN in ddH<sub>2</sub>O + 0.1% TFA over 35 min) to afford the product as a fine blue powder (87 mg, 52%).

<sup>1</sup>H NMR (400 MHz, CD<sub>3</sub>OD): δ = 8.32 – 8.22 (m, 2H), 7.52 (d, *J* = 7.5 Hz, 1H), 7.48 (d, *J* = 7.5 Hz, 1H), 7.46 – 7.41 (m, 1H), 7.40 – 7.34 (m, 2H), 7.33 – 7.29 (m, 1H), 7.24 (t, *J* = 7.9 Hz, 1H), 7.15 (d, *J* = 7.5 Hz, 1H), 6.57 (t, *J* = 12.4 Hz, 1H), 6.42 (d, *J* = 13.9 Hz, 1H), 6.13 (d, *J* = 13.6 Hz, 1H), 4.79 (s, 2H), 4.26 (t, *J* = 7.4 Hz, 2H), 2.82 (s, 3H), 2.50 (t, *J* = 2.6 Hz, 1H), 2.38 (td, *J* = 6.6, 2.6 Hz, 2H), 2.04 – 1.98 (m, 2H), 1.77 (s, 6H), 1.74 (s, 6H) ppm.

<sup>13</sup>C NMR (101 MHz, CD<sub>3</sub>OD) δ = 175.9, 175.3, 168.3, 156.4, 155.5, 144.1, 143.3, 142.8, 142.1, 129.8, 129.6, 127.9, 126.8, 126.0, 123.5, 123.3, 112.3, 111.3, 105.2, 104.1, 83.7, 71.4, 50.9, 50.5, 47.2, 44.0, 28.1, 27.8, 27.3, 26.6, 16.5 ppm.

HRMS (ESI) calcd for [C<sub>33</sub>H<sub>38</sub>N<sub>3</sub>O]<sup>+</sup>: 492.30149, found 492.30118.

## Synthesis of 5-*exo-trig* carbocyanines

### General procedure for the synthesis of 5-*exo-trig* Cy5 methyl esters (9)

In a flame-dried flask, compound **6** (50 mg, 0.16 mmol, 1.0 equiv.) was dissolved in anhydrous CH<sub>3</sub>CN (5 mL) and oxalyl chloride (19 μL, 0.22 mmol, 1.3 equiv.) was added dropwise. The solution was stirred for 1 h at 18 °C. Anhydrous CH<sub>3</sub>OH (5 mL) was added and the solution was stirred for additional 15 min. Solvents were removed under reduced pressure and the residue was used directly without further purification. The residue was dissolved in Ac<sub>2</sub>O (1 mL) in a microwave vial. Compound **8** (51 mg, 0.20 mmol, 1.2 equiv.) was added and the solution was heated to 120 °C for 1 h in the microwave. The mixture was cooled to room temperature and a solution of **7** (0.18 mmol, 1.1 equiv.) in pyridine (1 mL) was added dropwise. The mixture was heated in the microwave at 110 °C for 30 min. Solvents were removed under reduced pressure and the residue was purified via reverse-phase column chromatography (10 → 55% CH<sub>3</sub>CN in ddH<sub>2</sub>O + 0.1% TFA over 35 min) to afford the product as a fine blue powder.

### 3-(2-Methoxy-2-oxoethyl)-1,3-dimethyl-2-((1*E*,3*E*)-5-((*E*)-1,3,3-trimethylindolin-2-ylidene)penta-1,3-dien-1-yl)-3*H*-indol-1-ium 2,2,2-trifluoroacetate (**9a**)

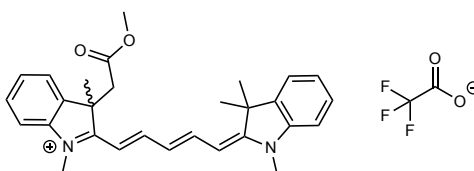

Yield: 57 mg, 61%

<sup>1</sup>H NMR (400 MHz, CD<sub>3</sub>OD): δ = 8.27 – 8.16 (m, 2H), 7.49 – 7.39 (m, 4H), 7.30 – 7.21 (m, 4H), 6.60 (t, *J* = 12.4 Hz, 1H), 6.27 (m, 2H), 3.63 (d, *J* = 17.4 Hz, 1H), 3.63 (s, 3H), 3.61 (s, 3H), 3.42 (d, *J* = 17.4 Hz, 1 H), 3.40 (s, 3H), 1.72 (s, 3H), 1.72 (s, 3H), 1.67 (s, 3H) ppm.

<sup>13</sup>C{<sup>1</sup>H} NMR (101 MHz, CD<sub>3</sub>OD): δ = 175.3, 173.7, 171.4, 155.4, 154.7, 145.3, 144.2, 142.5, 140.1, 130.0, 129.7, 126.6, 126.2, 126.0, 123.3, 123.0, 111.8, 111.7, 104.4, 104.3, 52.1, 51.4, 50.4, 44.9, 31.5, 31.4, 27.8, 27.6 ppm.

HRMS (ESI) calcd for [C<sub>29</sub>H<sub>33</sub>N<sub>2</sub>O<sub>2</sub>]<sup>+</sup>: 441.25420, found 441.25313.

**3-(2-Methoxy-2-oxoethyl)-1,3-dimethyl-2-((1E,3E)-5-((E)-1,3,3-trimethyl-5-(trifluoro-methyl)indolin-2-ylidene)penta-1,3-dien-1-yl)-3H-indol-1-ium 2,2,2-trifluoroacetate (9b)**

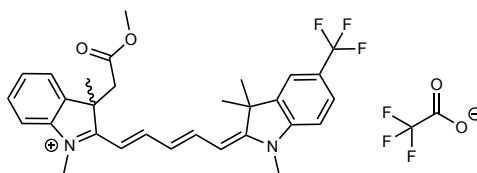

Yield: 67 mg, 64%

$^1\text{H}$  NMR (400 MHz,  $\text{CD}_3\text{OD}$ ):  $\delta$  = 8.32 – 8.19 (m, 2H), 7.73 (s, 1H), 7.68 (d,  $J$  = 8.4 Hz, 1H), 7.55 (d,  $J$  = 7.5 Hz, 1H), 7.50 – 7.42 (m, 2H), 7.36 – 7.30 (m, 2H), 6.66 (t,  $J$  = 12.4 Hz, 1H), 6.50 (d,  $J$  = 14.3 Hz, 1H), 6.17 (d,  $J$  = 13.3 Hz, 1H), 3.76 (s, 3H), 3.70 (d,  $J$  = 17.5 Hz, 1H), 3.55 (s, 3H), 3.50 (d,  $J$  = 17.7 Hz, 1H), 3.41 (s, 3H), 1.75 (s, 3H), 1.74 (s, 3H), 1.70 (s, 3H) ppm.

$^{13}\text{C}\{^1\text{H}\}$  NMR (101 MHz,  $\text{CD}_3\text{OD}$ ):  $\delta$  = 176.7, 172.8, 171.3, 156.4, 154.2, 147.7, 145.0, 142.7, 140.8, 130.2, 127.6, 127.35, 127.30 (q,  $J$  = 3.7 Hz), 126.6 (q,  $J$  = 32 Hz), 124.6, 120.3 (q,  $J$  = 3.7 Hz), 112.9, 110.9, 107.0, 103.5, 52.3, 52.2, 44.7, 32.1, 31.1, 27.92, 27.90, 27.2 ppm.

HRMS (ESI) calcd for  $[\text{C}_{30}\text{H}_{32}\text{F}_3\text{N}_2\text{O}_2]^+$ : 509.24159, found 509.24065.

**2-((1E,3E)-5-((E)-3,3-Dimethyl-1-(pent-4-yn-1-yl)indolin-2-ylidene)penta-1,3-dien-1-yl)-3-(2-methoxy-2-oxoethyl)-1,3-dimethyl-3H-indol-1-ium 2,2,2-trifluoroacetate (9c)**

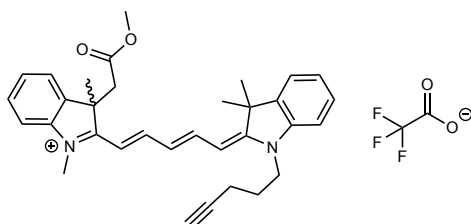

Yield: 67 mg, 66%

$^1\text{H}$  NMR (400 MHz,  $\text{CD}_3\text{OD}$ ):  $\delta$  = 8.28 – 8.18 (m, 2H), 7.49 (d,  $J$  = 7.5 Hz, 2H), 7.45 – 7.38 (m, 2H), 7.31 (d,  $J$  = 7.9 Hz, 2H), 7.25 (t,  $J$  = 8.0 Hz, 2H), 6.59 (t,  $J$  = 12.4 Hz, 1H), 6.35 – 6.30 (m, 2H), 4.20 (t,  $J$  = 7.4 Hz, 2H), 3.65 (s, 3H), 3.64 (d,  $J$  = 17.3 Hz, 1H), 3.44 (d,  $J$  = 17.4 Hz, 1H), 3.40 (s, 3H), 2.50 (t,  $J$  = 2.6 Hz, 1H), 2.37 (td,  $J$  = 6.6, 2.6 Hz, 2H), 2.03 – 1.96 (m, 2H), 1.73 (s, 6H), 1.73 (s, 3H), 1.68 (s, 3H) ppm.

$^{13}\text{C}\{^1\text{H}\}$  NMR (101 MHz,  $\text{CD}_3\text{OD}$ ):  $\delta$  = 174.4, 174.2, 171.4, 155.3, 155.0, 145.3, 143.6, 142.5, 140.2, 130.1, 129.7, 126.6, 126.3, 126.1, 123.4, 123.0, 111.9, 111.7, 104.9, 104.0, 83.8, 71.3, 52.1, 51.6, 50.4, 44.9, 43.6, 31.7, 28.0, 27.5, 27.2, 16.5 ppm.

HRMS (ESI) calcd for  $[\text{C}_{33}\text{H}_{37}\text{N}_2\text{O}_2]^+$ : 493.28550, found 493.28501.

**2-((1*E*,3*E*)-5-((*E*)-3,3-Dimethyl-1-(pent-4-yn-1-yl)-5-(trifluoromethyl)indolin-2-ylidene) penta-1,3-dien-1-yl)-3-(2-methoxy-2-oxoethyl)-1,3-dimethyl-3*H*-indol-1-ium 2,2,2-tri-fluoroacetate (9d)**

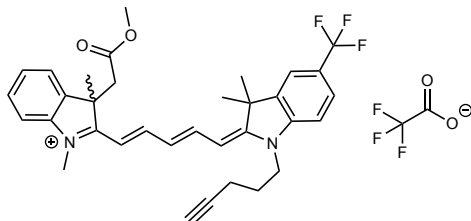

Yield: 71 mg, 63%

$^1\text{H}$  NMR (400 MHz,  $\text{CD}_3\text{OD}$ ):  $\delta$  = 8.33 – 8.18 (m, 2H), 7.73 (s, 1H), 7.67 (d,  $J$  = 8.3 Hz, 1H), 7.56 (d,  $J$  = 7.1 Hz, 1H), 7.51 – 7.44 (m, 2H), 7.35 (t,  $J$  = 7.4 Hz, 2H), 6.64 (t,  $J$  = 12.4 Hz, 1H), 6.53 (d,  $J$  = 14.4 Hz, 1H), 6.26 (d,  $J$  = 13.3 Hz, 1H), 4.15 (t,  $J$  = 7.4 Hz, 2H), 3.77 (s, 3H), 3.71 (d,  $J$  = 17.5 Hz, 1H), 3.51 (d,  $J$  = 17.5 Hz, 1H), 3.41 (s, 3H), 2.49 (t,  $J$  = 2.6 Hz, 1H), 2.37 (td,  $J$  = 6.7, 2.6 Hz, 2H), 1.98 (p,  $J$  = 7.3 Hz, 2H), 1.76 (s, 3H), 1.75 (s, 3H), 1.70 (s, 3H) ppm.

$^{13}\text{C}\{^1\text{H}\}$  NMR (101 MHz,  $\text{CD}_3\text{OD}$ ):  $\delta$  = 177.1, 171.7, 171.3, 156.4, 153.9, 147.1, 144.9, 142.7, 140.9, 130.3, 127.7, 127.5, 127.3 (q,  $J$  = 3.7 Hz), 126.6 (q,  $J$  = 32 Hz), 125.9 (q,  $J$  = 270.8 Hz), 123.2, 120.43 (q,  $J$  = 3.7 Hz), 113.0, 110.9, 107.4, 103.3, 83.8, 71.3, 52.4, 52.2, 44.7, 43.4, 32.3, 28.0, 27.1, 26.9, 16.5 ppm.

HRMS (ESI) calcd for  $[\text{C}_{34}\text{H}_{36}\text{F}_3\text{N}_2\text{O}_2]^+$ : 561.27289, found 561.27194.

### General procedure for the synthesis of 5-*exo-trig* Cy5 alcohols (4)

Methyl ester **9** (40 mg, 1.0 equiv.) was dissolved in anhydrous THF (3 mL) in a flame-dried flask and cooled to 0 °C. LiAlH<sub>4</sub> (4.0 equiv.) was added, and the solution was stirred for 1 h at 0 °C, followed by 16 h at 18 °C. The mixture was cooled again to 0 °C and water was added. The aqueous phase was extracted trice with CH<sub>2</sub>Cl<sub>2</sub>, and the combined organic phases were washed with brine and dried over Na<sub>2</sub>SO<sub>4</sub>. DDQ (1.0 equiv.) was added to re-oxidize the conjugated system of the carbocyanine core. Solvents were removed under reduced pressure and the residue was purified via reverse-phase column chromatography (10 → 65% CH<sub>3</sub>CN in ddH<sub>2</sub>O + 0.1% TFA over 35 min) to afford the product as a fine blue powder.

### 3-(2-Hydroxyethyl)-1,3-dimethyl-2-((1*E*,3*E*)-5-((*E*)-1,3,3-trimethylindolin-2-ylidene)-penta-1,3-dien-1-yl)-3*H*-indol-1-ium 2,2,2-trifluoroacetate (**4a**)

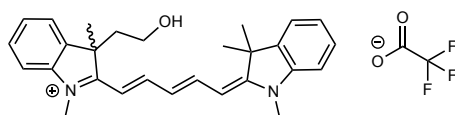

Yield: 21 mg, 55%

<sup>1</sup>H NMR (400 MHz, CD<sub>3</sub>OD): δ = 8.24 (t, *J* = 13.1 Hz, 2H), 7.50 – 7.40 (m, 4H), 7.30 – 7.24 (m, 4H), 6.62 (t, *J* = 12.4 Hz, 1H), 6.30 (d, *J* = 4.9 Hz, 1H), 6.26 (d, *J* = 4.9 Hz, 1H), 3.62 (s, 3H), 3.60 (s, 3H), 3.14 – 3.06 (m, 1H), 3.04 – 2.97 (m, 1H), 2.75 – 2.63 (m, 1H), 2.56 – 2.35 (m, 1H), 1.73 (s, 9H) ppm.

<sup>13</sup>C{<sup>1</sup>H} NMR (101 MHz, CD<sub>3</sub>OD): δ = 175.4, 173.8, 155.4, 155.0, 145.0, 144.3, 142.5, 140.2, 129.9, 129.7, 126.6, 126.3, 126.2, 123.4, 123.3, 111.82, 111.80, 104.8, 104.4, 59.2, 57.5, 53.0, 50.5, 44.5, 31.5, 28.2, 27.8 ppm.

HRMS (ESI) calcd for [C<sub>28</sub>H<sub>33</sub>N<sub>2</sub>O]<sup>+</sup>: 413.25874, found 413.25819.



**3-(2-Hydroxyethyl)-1,3-dimethyl-2-((1*E*,3*E*)-5-((*E*)-1,3,3-trimethyl-5-(trifluoromethyl)indolin-2-ylidene)penta-1,3-dien-1-yl)-3*H*-indol-1-ium 2,2,2-trifluoroacetate (4b)**

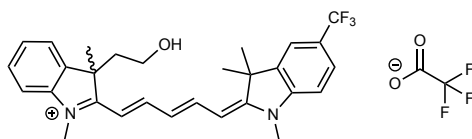

Yield: 24 mg, 63%

$^1\text{H}$  NMR (400 MHz,  $\text{CD}_3\text{OD}$ ):  $\delta$  = 8.33 (t,  $J$  = 13.1 Hz, 1H), 8.21 (t,  $J$  = 13.1 Hz, 1H), 7.73 (s, 1H), 7.67 (d,  $J$  = 8.4 Hz, 1H), 7.55 (d,  $J$  = 7.6 Hz, 1H), 7.50 (t,  $J$  = 7.0 Hz, 1H), 7.45 – 7.36 (m, 2H), 7.30 (d,  $J$  = 8.4 Hz, 1H), 6.67 (t,  $J$  = 12.5 Hz, 1H), 6.50 (d,  $J$  = 14.2 Hz, 1H), 6.17 (d,  $J$  = 13.3 Hz, 1H), 3.72 (s, 3H), 3.55 (s, 3H), 3.12 – 3.01 (m, 2H), 2.80 – 2.72 (m, 1H), 2.51 (m, 1H), 1.75 (s, 3H), 1.74 (s, 6H) ppm.

$^{13}\text{C}\{^1\text{H}\}$  NMR (101 MHz,  $\text{CD}_3\text{OD}$ ):  $\delta$  = 177.3, 172.6, 156.7, 153.9, 147.7, 144.7, 142.6, 140.9, 130.1, 127.6, 127.5, 127.3 (q,  $J$  = 3.7 Hz), 126.6 (q,  $J$  = 32.7 Hz), 124.6, 123.7, 120.3 (q,  $J$  = 3.7 Hz), 113.0, 110.9, 107.6, 103.4, 59.1, 57.5, 54.0, 44.5, 32.2, 31.1, 27.9 ppm.

HRMS (ESI) calcd for  $[\text{C}_{29}\text{H}_{32}\text{F}_3\text{N}_2\text{O}]^+$ : 481.24612, found 481.24588.

**2-((1*E*,3*E*)-5-((*E*)-3,3-Dimethyl-1-(pent-4-yn-1-yl)-5-(trifluoromethyl)indolin-2-ylidene)-penta-1,3-dien-1-yl)-3-(2-hydroxyethyl)-1,3-dimethyl-3*H*-indol-1-ium 2,2,2-trifluoroacetate (4c)**

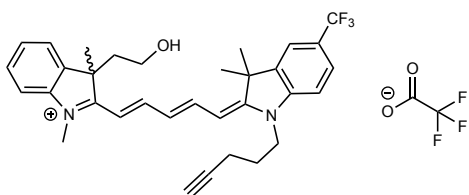

Yield: 26 mg, 69%

$^1\text{H}$  NMR (400 MHz,  $\text{CD}_3\text{OD}$ ):  $\delta$  = 8.34 (t,  $J$  = 13.2 Hz, 1H), 8.20 (t,  $J$  = 13.0 Hz, 1H), 7.73 (s, 1H), 7.67 (d,  $J$  = 8.4 Hz, 1H), 7.56 (d,  $J$  = 6.7 Hz, 1H), 7.53 – 7.48 (m, 1H), 7.46 (d,  $J$  = 8.1 Hz, 1H), 7.40 (td,  $J$  = 7.3, 1.3 Hz, 1H), 7.33 (d,  $J$  = 8.4 Hz, 1H), 6.66 (t,  $J$  = 12.4 Hz, 1H), 6.53 (d,  $J$  = 14.3 Hz, 1H), 6.26 (d,  $J$  = 13.1 Hz, 1H), 4.15 (t,  $J$  = 7.4 Hz, 2H), 3.74 (s, 3H), 3.15 – 3.00 (m, 2H), 2.82 – 2.72 (m, 1H), 2.57 – 2.50 (m, 1H), 2.50 (t,  $J$  = 2.6 Hz, 1H), 2.37 (td,  $J$  = 6.6, 2.6 Hz, 2H), 1.98 (p,  $J$  = 6.8 Hz, 2H), 1.75 (s, 9H) ppm.

$^{13}\text{C}\{^1\text{H}\}$  NMR (101 MHz,  $\text{CD}_3\text{OD}$ ):  $\delta$  = 177.7, 171.5, 156.8, 153.5, 147.2, 144.6, 142.6, 141.0, 130.1, 127.74, 127.65, 127.3 (q,  $J$  = 3.7 Hz), 126.6 (q,  $J$  = 32.6 Hz), 124.6,

123.7, 120.4 (q,  $J = 3.7$  Hz), 113.2, 110.9, 108.0, 103.2, 83.9, 71.3, 59.2, 54.2, 44.5, 43.4, 32.3, 28.1, 27.9, 26.9, 16.5 ppm.

HRMS (ESI) calcd for  $[C_{33}H_{36}F_3N_2O]^+$ : 533.27742, found 533.27686.

**2-((1*E*,3*E*)-5-((*E*)-3,3-Dimethyl-1-(pent-4-yn-1-yl)indolin-2-ylidene)penta-1,3-dien-1-yl) 1,3-dimethyl-3-(2-(methylamino)-2-oxoethyl)-3*H*-indol-1-ium 2,2,2-trifluoroacetate (12)**

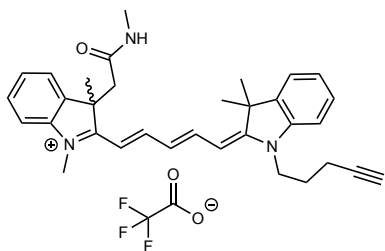

Compound **9c** (25 mg, 0.04 mmol, 1.0 equiv.) was dissolved in anhydrous THF (3 mL) and methyl amine (2.0 M solution in THF, 5 mL) was added. The solution was stirred at 70 °C for 16 h. Solvents were removed under reduced pressure and the residue was purified via reverse-phase column chromatography (10 → 55%

CH<sub>3</sub>CN in ddH<sub>2</sub>O + 0.1% TFA over 35 min) to afford the product as a fine blue powder (24 mg, 96%).

<sup>1</sup>H NMR (400 MHz, CD<sub>3</sub>OD):  $\delta = 8.18$  (t,  $J = 13.3$  Hz, 2H), 7.48 – 7.33 (m, 4H), 7.37 – 7.21 (m, 4H), 6.58 (t,  $J = 12.4$  Hz, 1H), 6.36 (d,  $J = 14.0$  Hz, 1H), 6.28 (d,  $J = 13.5$  Hz, 1H), 4.17 (t,  $J = 7.5$  Hz, 2H), 3.67 (s, 3H), 3.40 (d,  $J = 15.6$  Hz, 1H), 3.21 (d,  $J = 15.6$  Hz, 1H), 2.50 (t,  $J = 2.6$  Hz, 1H), 2.43 (s, 3H), 2.36 (td,  $J = 6.6, 2.6$  Hz, 2H), 1.99 (p,  $J = 6.8$  Hz, 2H), 1.72 (s, 3H), 1.72 (s, 3H) 1.68 (s, 3H) ppm.

<sup>13</sup>C{<sup>1</sup>H} NMR (101 MHz, CD<sub>3</sub>OD):  $\delta = 175.7, 173.4, 171.4, 155.3, 154.5, 145.1, 143.7, 142.3, 140.40, 130.0, 129.7, 126.5, 126.4, 125.8, 123.4, 123.2, 112.3, 111.4, 105.7, 103.4, 83.8, 71.3, 52.4, 50.2, 46.7, 43.5, 31.8, 28.1, 27.4, 27.2, 26.0, 16.5$  ppm.

HRMS (ESI) calcd for  $[C_{33}H_{38}N_3O]^+$ : 492.30149, found 492.30128.

**(4*R*,7*R*,10*S*,13*S*,19*S*,*E*)-7-((1*H*-indol-3-yl)methyl)-10-(4-(4-(3-((*E*)-3,3-dimethyl-2-((2*E*,4*E*)-5-(1,3*a*,8-trimethyl-2-oxo-2,3,3*a*,8-tetrahydropyrrolo[2,3-*b*]indol-8*a*(1*H*)-yl)penta-2,4-dien-1-ylidene)indolin-1-yl)propyl)-1*H*-1,2,3-triazol-1-yl)butyl)-4-(4-hydroxyphenyl)-8,13,15,19-tetramethyl-1-oxa-5,8,11-triazacyclononadec-15-ene-2,6,9,12-tetraone (17-actin)**

Boc-Lys-jasplakinolide (7 mg, 0.009 mmol, 1.0 equiv.) was dissolved in TFA:CH<sub>2</sub>Cl<sub>2</sub> (3:7 v/v, 0.3 mL) and stirred at 18 °C for 7.5 min. Toluene (0.6 mL) was added and solvents were removed under reduced pressure. Co-evaporation was carried out twice with 0.4 mL THF, and once with 0.4 mL THF and 10 μL triethylamine. The residue was used directly for the diazotizing reaction. The residue was dissolved in DMF/MTBE/H<sub>2</sub>O (94:5:1, 0.3 mL) and FSO<sub>2</sub>N<sub>3</sub> solution (1.35 equiv., 25 μL of a 488 mM solution) and aqueous potassium hydrogen carbonate solution (3 M, 0.3 mL) were added. The mixture was stirred for 1 h at 18 °C. Ethyl acetate was added and the organic phase was washed trice with brine, once with water and again with brine. The extracted organic phase was dried over Na<sub>2</sub>SO<sub>4</sub>, filtered, and solvents were removed under reduced pressure to yield azide-modified Lys-jasplakinolide, which was used directly in the Click reaction without further purification.

In a flame-dried flask, **12** (2.7 mg, 0.0045 mmol, 0.5 equiv.) and azide-modified Lys-jasplakinolide were dissolved in degassed THF (2 mL) and the solution was degassed for an additional hour by bubbling argon through the solution while stirring vigorously. Cu(PPh<sub>3</sub>)<sub>2</sub>NO<sub>3</sub> (1.5 mg, 0.0023 mmol, 0.25 equiv.) and triethylamine (5 μL) were added and the solution was stirred for 16 h at room temperature. Solvents were removed under reduced pressure and the residue was purified via reverse-phase column chromatography (10 → 90% CH<sub>3</sub>CN in ddH<sub>2</sub>O over 35 min).

Yield: 4.5 mg (42 %)

HRMS (ESI) calcd for [C<sub>71</sub>H<sub>87</sub>N<sub>10</sub>O<sub>7</sub>]<sup>+</sup>: 1191.67537, found 1191.67359.

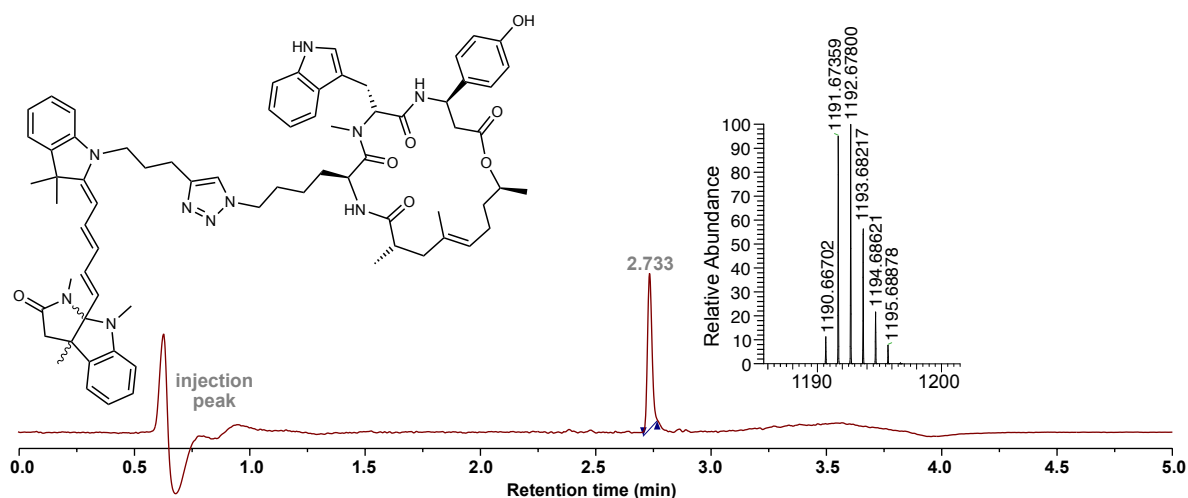

**8a-((1*E*,3*E*)-5-((*E*)-3,3-dimethyl-1-(3-(1-(4-(4-(6-(4-methylpiperazin-1-yl)-1*H*,3'*H*-[2,5'-bibenzo[*d*]imidazol]-2'-yl)phenoxy)butyl)-1*H*-1,2,3-triazol-4-yl)propyl)-indolin-2-ylidene)penta-1,3-dien-1-yl)-1,3a,8-trimethyl-3,3a,8,8a-tetrahydropyrrolo[2,3-*b*]indol-2(1*H*)-one (18-DNA)**

Boc-C4-Hoechst (6.3 mg, 0.011 mmol, 1.0 equiv.) was dissolved in dry CH<sub>2</sub>Cl<sub>2</sub> (0.8 mL) and TFA (0.2 mL) was added dropwise. The mixture was stirred at 18 °C for 30 min. Solvents were removed under reduced pressure and co-evaporation with THF (2x 0.4 mL) was carried out twice. The residue was used directly for the diazotizing reaction. The residue was dissolved in DMF/MTBE/H<sub>2</sub>O (94:5:1, 0.3 mL) and FSO<sub>2</sub>N<sub>3</sub> solution (1.35 equiv., 30 μL of a 488 mM solution) and aqueous potassium hydrogen carbonate solution (3 M, 0.3 mL) were added. The mixture was stirred for 1 h at 18 °C. Ethyl acetate was added and the organic phase was washed trice with brine, once with water and again with brine. The extracted organic phase was dried over Na<sub>2</sub>SO<sub>4</sub>, filtered, and solvents were removed under reduced pressure to yield azide-modified C4-Hoechst, which was used directly in the Click reaction without further purification. In a flame-dried flask, **12** (3.2 mg, 0.0053 mmol, 0.5 equiv.) and azide-modified C4-Hoechst were dissolved in degassed THF (2 mL) and the solution was degassed for an additional hour by bubbling argon through the solution while stirring vigorously. Cu(PPh<sub>3</sub>)<sub>2</sub>NO<sub>3</sub> (1.7 mg, 0.0023 mmol, 0.25 equiv.) and triethylamine (5 μL) were added and the solution was stirred for 16 h at room temperature. Solvents were removed under reduced pressure and the residue was purified via reverse-phase column chromatography (10 → 55% CH<sub>3</sub>CN in ddH<sub>2</sub>O + 0.1% TFA over 35 min).

Yield: 2.9 mg (27 %)

HRMS (ESI) calcd for [C<sub>62</sub>H<sub>69</sub>N<sub>12</sub>O<sub>2</sub>]<sup>+</sup>: 1013.56610, found 1013.56422.

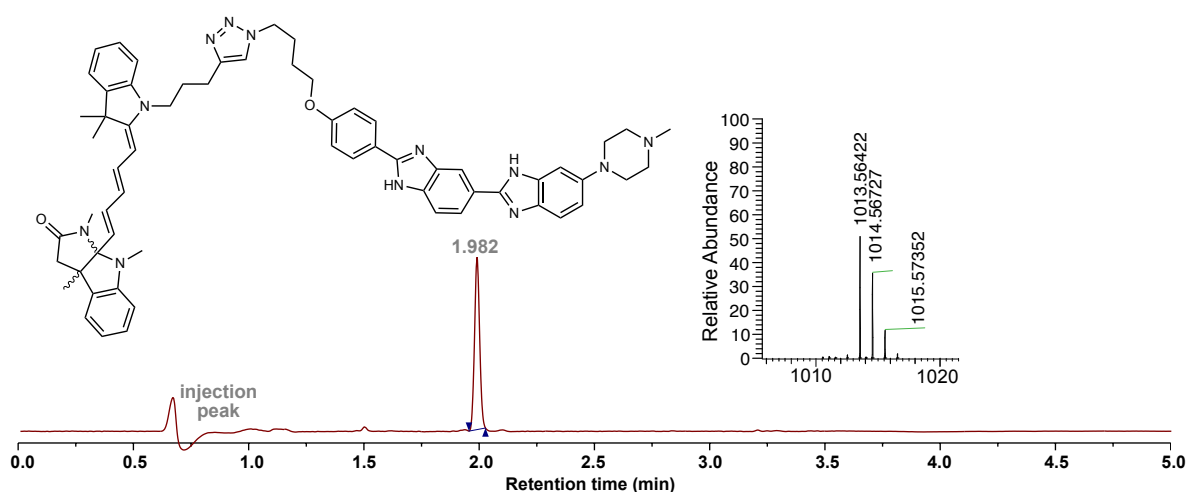

**2-((*E*)-3-((*E*)-3,3-Dimethyl-1-(pent-4-yn-1-yl)-5-(trifluoromethyl)indolin-2-ylidene)prop-1-en-1-yl)-3-(2-methoxy-2-oxoethyl)-1,3-dimethyl-3*H*-indol-1-ium 2,2,2-trifluoro-acetate (21)**

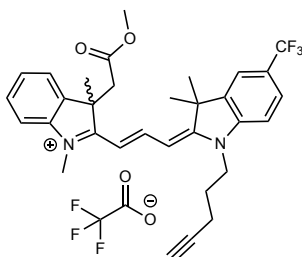

In a flame-dried flask, compound **6** (50 mg, 0.16 mmol, 1.0 equiv.) was dissolved in anhydrous CH<sub>3</sub>CN (5 mL) and oxalyl chloride (19 μL, 0.22 mmol, 1.3 equiv.) was added dropwise. The solution was stirred for 1 h at 18 °C. Anhydrous CH<sub>3</sub>OH (5 mL) was added and the solution was stirred for additional 15 min. Solvents were removed under reduced pressure and the residue was used directly without further purification. The residue was dissolved in Ac<sub>2</sub>O (1 mL) in a microwave vial. *N,N'*-Diphenylformamidine (40 mg, 0.21 mmol, 1.2 equiv.) was added and the solution was heated to 95 °C for 1 h in the microwave. The mixture was cooled to room temperature and a solution of **7d** (74 mg, 0.18 mmol, 1.1 equiv.) in pyridine (1 mL) was added dropwise. The mixture was heated in the microwave at 100 °C for 30 min. Solvents were removed under reduced pressure and the residue was purified via reverse-phase column chromatography (10 → 60% CH<sub>3</sub>CN in ddH<sub>2</sub>O + 0.1% TFA over 35 min) to afford the product as a fine red powder (72 mg, 67%).

<sup>1</sup>H NMR (400 MHz, CD<sub>3</sub>OD): δ = 8.45 (t, *J* = 13.5 Hz, 1H), 7.85 (s, 1H), 7.74 (d, *J* = 9.4 Hz, 1H), 7.59 (d, *J* = 7.4 Hz, 1H), 7.53 – 7.45 (m, 3H), 7.39 – 7.35 (m, 1H), 6.56 (d, *J* = 13.9 Hz, 1H), 6.48 (d, *J* = 13.1 Hz, 1H), 4.24 (t, *J* = 7.4 Hz, 2H), 3.79 (s, 3H), 3.65 (d, *J* = 16.9 Hz, 1H), 3.42 (s, 3H), 3.36 (d, *J* = 17.1 Hz, 1H), 2.50 (t, *J* = 2.6 Hz, 1H), 2.40 (td, *J* = 6.8, 2.7 Hz, 2H), 2.04 (p, *J* = 6.8 Hz, 2H), 1.81 (s, 3H), 1.80 (s, 3H), 1.73 (s, 3H) ppm.

<sup>13</sup>C{<sup>1</sup>H} NMR (101 MHz, CD<sub>3</sub>OD): δ = 175.5, 173.8, 169.4, 150.2, 145.3, 143.4, 141.2, 139.0, 129.0, 126.4 (q, *J* = 32 Hz), 126.2, 124.4 (q, *J* = 270 Hz), 121.9, 119.4 (q, *J* = 3.7 Hz), 111.7, 110.6, 104.5, 102.2, 82.3, 70.0, 51.0, 50.9, 48.8, 44.0, 42.6, 31.1, 26.9, 26.9, 26.2, 25.7, 15.2 ppm.

HRMS (ESI) calcd for [C<sub>32</sub>H<sub>34</sub>F<sub>3</sub>N<sub>2</sub>O<sub>2</sub>]<sup>+</sup>: 535.25724, found 535.25695.

**2-((*E*)-3-((*E*)-3,3-Dimethyl-1-(pent-4-yn-1-yl)-5-(trifluoromethyl)indolin-2-ylidene)prop-1-en-1-yl)-1,3-dimethyl-3-(2-(methylamino)-2-oxoethyl)-3*H*-indol-1-ium 2,2,2-trifluoro-acetate (**22**)**

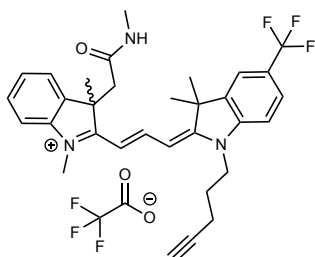

Compound **21** (25 mg, 0.04 mmol, 1.0 equiv.) was dissolved in anhydrous THF (3 mL) and methyl amine (2.0 M solution in THF, 5 mL) was added. The solution was stirred at 70 °C for 16 h. Solvents were removed under reduced pressure and the residue was purified via reverse-phase column chromatography (10 → 50% CH<sub>3</sub>CN in ddH<sub>2</sub>O + 0.1% TFA over 35 min) to afford the product as a fine red powder (24 mg, 96%).

<sup>1</sup>H NMR (400 MHz, CD<sub>3</sub>OD): δ = 8.45 (t, *J* = 13.5 Hz, 1H), 7.82 (s, 1H), 7.72 (d, *J* = 8.4 Hz, 1H), 7.53 (d, *J* = 7.5 Hz, 1H), 7.49 (dd, *J* = 7.1, 1.2 Hz, 1H), 7.47 – 7.43 (m, 2H), 7.37 (td, *J* = 7.3, 1.3 Hz, 1H), 6.57 (d, *J* = 13.9 Hz, 1H), 6.43 (d, *J* = 12.9 Hz, 1H), 4.22 (t, *J* = 7.4 Hz, 2H), 3.80 (s, 3H), 3.39 (d, *J* = 15.9 Hz, 1H), 3.23 (d, *J* = 15.9 Hz, 1H), 2.50 (t, *J* = 2.7 Hz, 1H), 2.43 (s, 3H), 2.39 (td, *J* = 6.8, 2.6 Hz, 2H), 2.03 (p, *J* = 6.9 Hz, 2H), 1.79 (s, 3H), 1.78 (s, 3H), 1.72 (s, 3H) ppm.

<sup>13</sup>C{<sup>1</sup>H} NMR (101 MHz, CD<sub>3</sub>OD): δ = 178.4, 174.2, 170.5, 151.4, 146.8, 144.8, 142.4, 140.4, 130.3, 127.6 (q, *J* = 4.1 Hz), 127.53, 127.47 (q, *J* = 32 Hz), 125.8 (q, *J* = 270.7 Hz), 123.3, 120.7 (q, *J* = 3.5 Hz), 113.3, 111.7, 106.7, 103.1, 83.7, 71.4, 52.9, 50.0, 47.1, 43.9, 32.6, 28.5, 28.4, 27.4, 27.0, 26.0, 16.6 ppm.

HRMS (ESI) calcd for [C<sub>32</sub>H<sub>35</sub>F<sub>3</sub>N<sub>3</sub>O]<sup>+</sup>: 534.27322, found 534.27268.

**3-(Carboxymethyl)-2-((1*E*,3*E*,5*E*)-7-((*E*)-3,3-dimethyl-1-(pent-4-yn-1-yl)indolin-2-ylidene)hepta-1,3,5-trien-1-yl)-1,3-dimethyl-3*H*-indol-1-ium 2,2,2-trifluoro-acetate (**23**)**

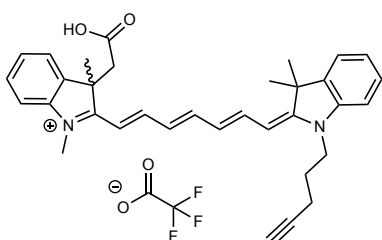

Compound **6** (100 mg, 0.34 mmol, 1.0 equiv.) and glutacanaldehydedianil hydrochloride (114 mg, 0.40 mmol, 1.2 equiv.) were dissolved in Ac<sub>2</sub>O (2 mL) in a microwave vial. The solution was heated to 120 °C for 1 h in the microwave. The mixture was cooled to room temperature and a solution of **7c** (130 mg, 0.37 mmol,

1.1 equiv.) in pyridine (2 mL) was added dropwise. The mixture was heated to 100 °C for 30 min. Solvents were removed under reduced pressure and the residue was purified via reverse phase column chromatography (10 → 65% CH<sub>3</sub>CN in ddH<sub>2</sub>O + 0.1% TFA over 35 min) to afford the product as a fine green powder (95 mg, 46%).

<sup>1</sup>H NMR (400 MHz, CD<sub>3</sub>OD): δ = 7.97 (t, *J* = 12.7 Hz, 1H), 7.71 (t, *J* = 12.9 Hz, 1H), 7.51 (d, *J* = 7.5 Hz, 1H), 7.43 (td, *J* = 8.2, 1.3 Hz, 1H), 7.39 – 7.35 (m, 2H), 7.33 – 7.28

(m, 2H), 7.10 (d,  $J = 7.8$  Hz, 2H), 6.58 – 6.39 (m, 4H), 6.04 (d,  $J = 13.3$  Hz, 1H), 4.03 (t,  $J = 7.4$  Hz, 2H), 3.72 (s, 3H), 3.38 (d,  $J = 16.8$  Hz, 1H), 3.28 (d,  $J = 16.8$  Hz, 1H), 2.47 (t,  $J = 2.7$  Hz, 1H), 2.34 (dt,  $J = 6.9, 3.4$  Hz, 2H), 1.94 (p,  $J = 6.8$  Hz, 2H), 1.65 (s, 6H), 1.58 (s, 3H) ppm.

$^{13}\text{C}$  NMR (101 MHz,  $\text{CD}_3\text{OD}$ )  $\delta = 177.9, 175.6, 168.4, 156.1, 154.4, 148.5, 145.1, 144.4, 142.7, 141.5, 129.6, 129.4, 127.3, 126.2, 124.2, 123.2, 123.0, 112.9, 110.1, 108.7, 101.6, 84.0, 73.7, 71.6, 71.1, 53.5, 42.9, 32.2, 28.4, 27.4, 26.9, 16.6$  ppm.

HRMS (ESI) calcd for  $[\text{C}_{34}\text{H}_{37}\text{N}_2\text{O}_2]^+$ : 505.28495, found 505.28459.

### 3-(2-((2,2-Difluoroethyl)amino)-2-oxoethyl)-2-((1E,3E,5E)-7-((E)-3,3-dimethyl-1-(pent-4-yn-1-yl)indolin-2-ylidene)hepta-1,3,5-trien-1-yl)-1,3-dimethyl-3H-indol-1-ium 2,2,2-trifluoro-acetate (24)

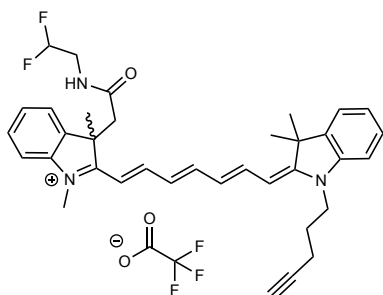

In a flame-dried flask, compound **23** (20 mg, 0.03 mmol, 1.0 equiv.) was dissolved in dry  $\text{CH}_2\text{Cl}_2$  (5 mL) and 4-dimethylaminopyridine (15.8 mg, 0.13 mmol, 4.0 equiv.) and *N*-(3-dimethylamino-propyl)-3-ethyl carbodiimide hydrochloride (EDC-HCl, 24.8 mg, 0.13 mmol, 4.0 equiv.) were added. The solution was stirred at 18 °C for 30 min. 2,2-Difluoroethylamine hydrochloride (76 mg,

0.65 mmol, 20.0 equiv.) was added and the solution was stirred overnight at 18 °C. Solvents were removed under reduced pressure and the residue was purified via reverse phase column chromatography (10 → 75%  $\text{CH}_3\text{CN}$  in  $\text{ddH}_2\text{O}$  + 0.1% TFA over 35 min) to afford the product as a fine green powder (18 mg, 82%).

$^1\text{H}$  NMR (400 MHz,  $\text{CD}_3\text{CN}$ ):  $\delta = 7.89 - 7.83$  (m, 1H), 7.78 – 7.72 (m, 1H), 7.58 (t,  $J = 13.0$  Hz, 1H), 7.47 (d,  $J = 7.9$  Hz, 1H), 7.43 – 7.39 (m, 2H), 7.37 – 7.33 (m, 1H), 7.26 (t,  $J = 7.6$  Hz, 2H), 7.17 (d,  $J = 7.8$  Hz, 2H), 6.53 – 6.42 (m, 2H), 6.30 (d,  $J = 14.2$  Hz, 1H), 6.15 (d,  $J = 13.4$  Hz, 1H), 5.55 (tt,  $J = 56.0, 3.9$  Hz, 1H), 4.02 (t,  $J = 7.5$  Hz, 2H), 3.57 (s, 3H), 3.37 (d,  $J = 16.0$  Hz, 1H), 3.32 – 3.22 (m, 3H), 2.36 – 2.31 (m, 3H), 1.64 (s, 6H), 1.60 (s, 3H) ppm.

$^{13}\text{C}$  NMR (101 MHz,  $\text{CD}_3\text{CN}$ )  $\delta = 174.5, 171.0, 169.9, 156.6, 152.9, 150.6, 144.8, 143.8, 141.8, 140.6, 129.7, 129.4, 126.6, 126.2, 125.0, 123.2, 117.6, 115.2, 112.8, 112.1, 111.0, 106.3, 103.1, 84.2, 71.1, 68.3, 52.0, 49.5, 46.4, 43.4, 41.8$  ( $J = 26.7$  Hz), 32.3, 28.0, 27.4, 26.7, 16.4 ppm.

HRMS (ESI) calcd for  $[\text{C}_{36}\text{H}_{40}\text{F}_2\text{N}_3\text{O}]^+$ : 568.31340, found 568.31309.

## Click reactions

### General procedure for the click reaction of carbocyanines bearing an alkyne handle (**4c**, **13**, **14**, **22**, **24**) to azide-modified SNAP-tag ligand **10**

In a flame-dried flask, alkyne-modified carbocyanine dye (15 mg, 1.0 equiv.) and **10** (1.5 equiv.) were dissolved in degassed THF (5 mL) and the solution was degassed for an additional hour by bubbling argon through the solution while stirring vigorously. Cu(PPh<sub>3</sub>)<sub>2</sub>NO<sub>3</sub> (0.5 equiv.) and triethylamine (10 μL) were added and the solution was stirred for 16 h at room temperature. Solvents were removed under reduced pressure and the residue was purified via reverse-phase column chromatography (10 → 45% CH<sub>3</sub>CN in ddH<sub>2</sub>O + 0.1% TFA over 35 min).

### 2-((1*E*,3*E*)-5-((*E*)-1-(3-(1-(4-(((2-Amino-9*H*-purin-6-yl)oxy)methyl)benzyl)-1*H*-1,2,3-triazol-4-yl)propyl)-3,3-dimethyl-5-(trifluoromethyl)indolin-2-ylidene)penta-1,3-dien-1-yl)-3-(2-hydroxyethyl)-1,3-dimethyl-3*H*-indol-1-ium 2,2,2-trifluoroacetate (**11**)

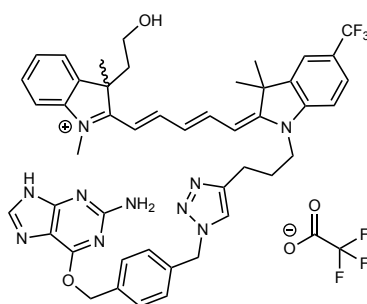

Yield: 10 mg, 45%

<sup>1</sup>H NMR (400 MHz, CD<sub>3</sub>OD): δ = 8.36 – 8.29 (m, 1H), 8.26 – 8.151 (m, 2H), 7.83 (s, 1H), 7.71 (s, 1H), 7.60 – 7.54 (m, 4H), 7.52 – 7.48 (m, 1H), 7.44 – 7.37 (m, 4H), 7.19 (d, *J* = 8.4 Hz, 1H), 6.60 (t, *J* = 12.4 Hz, 1H), 6.49 (d, *J* = 14.2 Hz, 1H), 6.13 (d, *J* = 13.1 Hz, 1H), 5.62 (s, 2H), 5.61 (s, 2H), 4.07 (t, *J* = 7.6 Hz, 2H), 3.73 (s, 3H), 3.13 – 3.00 (m, 2H), 2.86 (t, *J* = 7.3 Hz, 2H), 2.79 – 2.72 (m, 1H), 2.55 – 2.47 (m, 1H), 2.21 – 2.13 (m, 2H), 1.74 (s, 3H), 1.72 (s, 6H) ppm.

<sup>13</sup>C{<sup>1</sup>H} NMR (126 MHz, CD<sub>3</sub>OD): δ = 177.6, 171.4, 161.1, 158.9, 156.7, 153.6, 148.1, 147.1, 144.6, 142.7, 141.0, 137.4, 137.2, 130.4, 130.1, 129.4, 129.2, 127.8, 127.6, 127.3 (q, *J* = 4.2 Hz), 125.9 (q, *J* = 270.8 Hz), 123.8, 123.7, 120.4 (q, *J* = 3.3 Hz), 113.1, 110.9, 107.9, 103.4, 70.1, 59.2, 54.5, 54.1, 44.5, 43.9, 36.5, 32.3, 28.0, 27.9, 27.3, 23.4, 14.4 ppm.

HRMS (ESI) calcd for [C<sub>46</sub>H<sub>48</sub>F<sub>3</sub>N<sub>10</sub>O<sub>2</sub>]<sup>+</sup>: 829.39083, found 829.38980.



**2-((1*E*,3*E*)-5-((*E*)-1-(3-(1-(4-(((2-Amino-9*H*-purin-6-yl)oxy)methyl)benzyl)-1*H*-1,2,3-triazol-4-yl)propyl)-3,3-dimethylindolin-2-ylidene)penta-1,3-dien-1-yl)-1,3-dimethyl-3-(2-(methylamino)-2-oxoethyl)-3*H*-indol-1-ium 2,2,2-trifluoroacetate (15)**

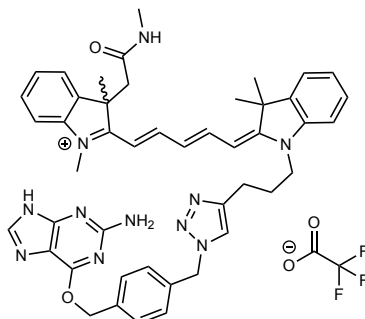

Yield: 14 mg, 64%

$^1\text{H}$  NMR (400 MHz,  $\text{CD}_3\text{OD}$ ):  $\delta$  = 8.30 (s, 1H), 8.16 (td,  $J$  = 13.0, 12.6, 5.9 Hz, 2H), 7.83 (s, 1H), 7.57 (d,  $J$  = 8.3 Hz, 2H), 7.45 – 7.37 (m, 5H), 7.31 (dd,  $J$  = 8.4, 3.2 Hz, 2H), 7.26 (t,  $J$  = 8.0 Hz, 1H), 7.19 (t,  $J$  = 7.5 Hz, 1H), 7.14 (d,  $J$  = 7.8 Hz, 1H), 6.52 (t,  $J$  = 12.4 Hz, 1H), 6.32 (d,  $J$  = 14.0 Hz, 1H), 6.13 (d,  $J$  = 13.5 Hz, 1H), 5.63 (s, 2H), 5.61 (s, 2H), 4.10 (t,  $J$  = 7.6 Hz, 2H), 3.66 (s, 3H), 3.40 (d,  $J$  = 15.5 Hz, 1H), 3.20 (d,  $J$  = 15.8 Hz, 1H), 2.86 (t,  $J$  = 7.3 Hz, 2H), 2.43 (s, 3H), 2.18 (p,  $J$  = 7.3 Hz, 2H), 1.69 (s, 6H), 1.67 (s, 3H) ppm.

$^{13}\text{C}\{^1\text{H}\}$  NMR (151 MHz,  $\text{CD}_3\text{OD}$ ):  $\delta$  = 175.6, 173.4, 171.4, 161.1, 158.6, 155.2, 154.5, 148.1, 145.1, 143.7, 142.3, 140.4, 137.5, 130.5, 130.0, 129.6, 129.4, 126.5, 126.3, 125.7, 123.8, 123.4, 123.2, 112.2, 111.5, 105.5, 103.5, 70.3, 54.5, 52.3, 50.19, 46.73, 44.0, 31.8, 28.04, 28.02, 27.6, 27.5, 26.0, 23.4 ppm.

HRMS (ESI) calcd for  $[\text{C}_{46}\text{H}_{50}\text{N}_{11}\text{O}_2]^+$ : 788.41435, found 788.41445.

**2-((1*E*,3*E*)-5-((*E*)-1-(3-(1-(4-(((2-Amino-9*H*-purin-6-yl)oxy)methyl)benzyl)-1*H*-1,2,3-triazol-4-yl)propyl)-3,3-dimethylindolin-2-ylidene)penta-1,3-dien-1-yl)-3,3-dimethyl-1-(2-(methylamino)-2-oxoethyl)-3*H*-indol-1-ium 2,2,2-trifluoroacetate (16)**

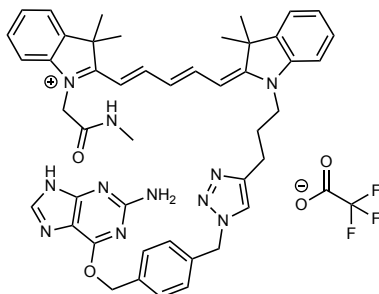

Yield: 9 mg, 42%

<sup>1</sup>H NMR (400 MHz, CD<sub>3</sub>OD): δ = 8.32 – 8.17 (m, 2H), 8.13 (s, 1H), 7.83 (s, 1H), 7.56 (d, *J* = 8.4 Hz, 2H), 7.48 (dd, *J* = 14.6, 6.7 Hz, 2H), 7.37 (dd, *J* = 9.5, 8.1 Hz, 4H), 7.29 – 7.23 (m, 3H), 7.14 (d, *J* = 7.9 Hz, 1H), 6.46 (t, *J* = 12.4 Hz, 1H), 6.23 (d, *J* = 13.5 Hz, 1H), 6.07 (d, *J* = 13.9 Hz, 1H), 5.61 (s, 2H), 5.60 (s, 2H), 4.78 (s, 2H), 4.18 (t, *J* = 7.5 Hz, 2H), 2.87 (t, *J* = 7.1 Hz, 2H), 2.80 (s, 3H), 2.20 (t, *J* = 7.5 Hz, 2H), 1.75 (s, 6H), 1.70 (s, 6H) ppm.

<sup>13</sup>C{<sup>1</sup>H} NMR (151 MHz, CD<sub>3</sub>OD): δ = 175.9, 175.1, 168.4, 161.1, 156.4, 155.2, 148.0, 144.1, 143.3, 142.9, 142.1, 137.5, 137.3, 130.3, 129.8, 129.6, 129.3, 127.0, 126.8, 126.0, 123.9, 123.5, 123.4, 112.3, 111.2, 105.4, 104.0, 69.7, 54.6, 50.9, 50.4, 49.6, 47.3, 44.4, 28.0, 27.8, 27.7, 26.6, 23.3 ppm.

HRMS (ESI) calcd for [C<sub>46</sub>H<sub>50</sub>N<sub>11</sub>O<sub>2</sub>]<sup>+</sup>: 788.41435, found 788.41441.

**2-((*E*)-3-((*E*)-1-(3-(1-(4-(((2-Amino-9*H*-purin-6-yl)oxy)methyl)benzyl)-1*H*-1,2,3-triazol-4-yl)propyl)-3,3-dimethyl-5-(trifluoromethyl)indolin-2-ylidene)prop-1-en-1-yl)-1,3-di-methyl-3-(2-(methylamino)-2-oxoethyl)-3*H*-indol-1-ium 2,2,2-trifluoroacetate (19)**

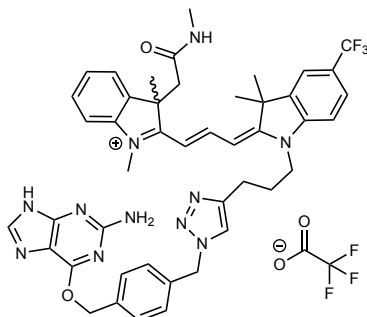

Yield: 16 mg, 73%

$^1\text{H}$  NMR (400 MHz,  $\text{CD}_3\text{OD}$ ):  $\delta$  = 8.42 (t,  $J$  = 13.5 Hz, 1H), 8.31 (s, 1H), 7.84 (s, 1H), 7.80 (s, 1H), 7.66 (d,  $J$  = 8.4 Hz, 1H), 7.57 (d,  $J$  = 8.1 Hz, 2H), 7.52 (d,  $J$  = 7.5 Hz, 1H), 7.50 – 7.42 (m, 2H), 7.40 – 7.28 (m, 4H), 6.57 (d,  $J$  = 13.9 Hz, 1H), 6.37 (d,  $J$  = 13.0 Hz, 1H), 5.64 (s, 2H), 5.61 (s, 2H), 4.16 (t,  $J$  = 7.5 Hz, 2H), 3.78 (s, 3H), 3.38 (d,  $J$  = 15.9 Hz, 1H), 3.22 (d,  $J$  = 15.7 Hz, 1H), 2.88 (t,  $J$  = 7.3 Hz, 2H), 2.42 (s, 3H), 2.21 (p,  $J$  = 7.5 Hz, 2H), 1.76 (s, 3H), 1.76 (s, 3H), 1.70 (s, 3H) ppm.

$^{13}\text{C}\{^1\text{H}\}$  NMR (151 MHz,  $\text{CD}_3\text{OD}$ ):  $\delta$  = 178.3, 174.1, 170.5, 161.0, 158.5, 153.9, 151.3, 148.0, 146.8, 144.8, 143.3, 142.5, 140.4, 137.5, 137.1, 130.5, 130.3, 129.4, 127.5, 127.3, 125.8 (q,  $J$  = 271.3 Hz), 123.9, 123.3, 120.7 (q,  $J$  = 4.1 Hz), 113.3, 111.7, 106.8, 103.4, 70.3, 54.5, 52.9, 49.9, 47.1, 44.3, 32.6, 28.5, 28.4, 27.43, 27.35, 26.0, 23.4 ppm.

HRMS (ESI) calcd for  $[\text{C}_{45}\text{H}_{47}\text{F}_3\text{N}_{11}\text{O}_2]^+$ : 830.38608, found 830.38619.

**2-((1*E*,3*E*,5*E*)-7-((*E*)-1-(3-(1-(4-(((2-Amino-9*H*-purin-6-yl)oxy)methyl)benzyl)-1*H*-1,2,3-triazol-4-yl)propyl)-3,3-dimethylindolin-2-ylidene)hepta-1,3,5-trien-1-yl)-3-(2-((2,2-difluoroethyl)amino)-2-oxoethyl)-1,3-dimethyl-3*H*-indol-1-ium 2,2,2-trifluoroacetate (20)**

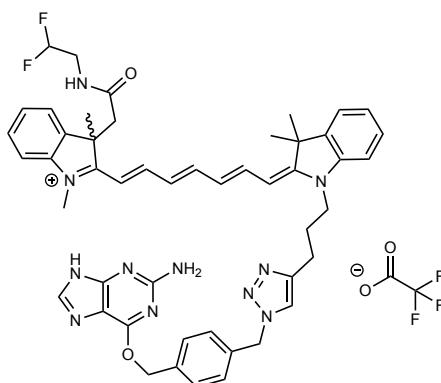

Yield: 12.5 mg, 58%

$^1\text{H}$  NMR (400 MHz,  $\text{CD}_3\text{CN}$ ):  $\delta$  = 7.96 (s, 1H), 7.79 – 7.66 (m, 2H), 7.61 (s, 1H), 7.53 (d,  $J$  = 8.1 Hz, 2H), 7.45 – 7.38 (m, 3H), 7.34 – 7.30 (m, 3H), 7.26 – 7.21 (m, 2H), 7.17 (t,  $J$  = 7.6 Hz, 1H), 7.11 (d,  $J$  = 7.9 Hz, 1H), 6.76 (t,  $J$  = 6.0 Hz, 1H), 6.42 (t,  $J$  = 12.6 Hz, 1H), 6.29 (dd,  $J$  = 31.8, 13.3 Hz, 2H), 6.04 (d,  $J$  = 13.5 Hz, 1H), 5.53 (tt,  $J$  = 55.9, 3.8 Hz, 1H), 5.56 (s, 2H), 5.55 (s, 2H), 4.00 (t,  $J$  = 7.7 Hz, 2H), 3.55 (s, 3H), 3.31 – 3.17 (m, 2H), 3.13 – 3.07 (m, 2H), 2.80 (t,  $J$  = 7.3 Hz, 2H), 2.15 – 2.07 (m, 2H), 1.59 (s, 9H) ppm.

$^{13}\text{C}\{^1\text{H}\}$  NMR (126 MHz,  $\text{CD}_3\text{CN}$ ):  $\delta$  = 173.5, 171.6, 170.0, 160.9, 158.0, 156.2, 154.2, 152.1, 151.0, 147.8, 144.9, 143.6, 141.9, 140.2, 137.5, 136.9, 130.1, 129.7, 129.4, 129.1, 126.4, 125.9, 125.3, 123.2, 123.1, 117.0, 115.1, 113.2, 111.9, 111.3, 105.7, 103.8, 69.6, 54.0, 51.8, 49.7, 47.2, 46.5, 44.1, 41.8 (t,  $J$  = 20.8 Hz), 32.3, 27.9, 27.4, 27.2, 23.2, 9.0 ppm.

HRMS (ESI) calcd for  $[\text{C}_{49}\text{H}_{52}\text{F}_2\text{N}_{11}\text{O}_2]^+$ : 864.42680, found 864.42562.

## Supplementary Compounds

### 3-(Carboxymethyl)-1,3-dimethyl-2-((1*E*,3*E*)-5-((*E*)-1,3,3-trimethyl-5-(trifluoromethyl)indolin-2-ylidene)penta-1,3-dien-1-yl)-3*H*-indol-1-ium 2,2,2-trifluoroacetate (**S1**)

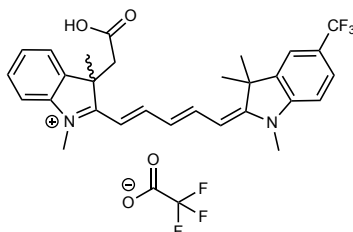

Compound **S1** was synthesized in the same manner as compound **2b** in 56% yield.

$^1\text{H}$  NMR (400 MHz,  $\text{CD}_3\text{OD}$ ):  $\delta$  = 8.30 (dd,  $J$  = 14.3, 11.9 Hz, 1H), 8.22 (t,  $J$  = 13.1 Hz, 1H), 7.71 (s, 1H), 7.66 (dd,  $J$  = 8.3, 1.1 Hz, 1H), 7.57 (d,  $J$  = 7.6 Hz, 1H), 7.50 – 7.42 (m, 2H), 7.35 (td,  $J$  = 7.4, 1.3 Hz, 1H), 7.29 (d,  $J$  = 8.4 Hz, 1H), 6.66 (t,  $J$  = 12.4 Hz, 1H), 6.51 (d,  $J$  = 14.3 Hz, 1H), 6.14 (d,  $J$  = 13.3 Hz, 1H), 3.75 (s, 3H), 3.69 (d,  $J$  = 17.6 Hz, 1H), 3.54 (s, 3H), 3.47 (d,  $J$  = 17.9 Hz, 1H), 1.75 (s, 3H), 1.74 (s, 3H), 1.68 (s, 3H) ppm.

$^{13}\text{C}\{^1\text{H}\}$  NMR (101 MHz,  $\text{CD}_3\text{OD}$ ):  $\delta$  = 177.4, 172.5, 172.3, 156.4, 153.8, 147.8, 145.0, 142.6, 141.3, 130.1, 127.5, 127.4, 127.3 (q,  $J$  = 3.6 Hz), 126.5 (q,  $J$  = 32.6 Hz), 124.6, 123.1, 120.3 (q,  $J$  = 3.5 Hz), 110.8, 107.4, 103.2, 52.4, 44.9, 32.2, 28.0, 27.9, 27.3 ppm.

HRMS (ESI) calcd for  $[\text{C}_{29}\text{H}_{30}\text{F}_3\text{N}_2\text{O}_2]^+$ : 495.22539, found 495.22509.

### 2-((1*E*,3*E*)-5-((*E*)-3,3-Dimethyl-1-(pent-4-yn-1-yl)-5-(trifluoromethyl)indolin-2-ylidene)penta-1,3-dien-1-yl) 1,3-dimethyl-3-(2-(methylamino)-2-oxoethyl)-3*H*-indol-1-ium 2,2,2-trifluoroacetate (**S2**)

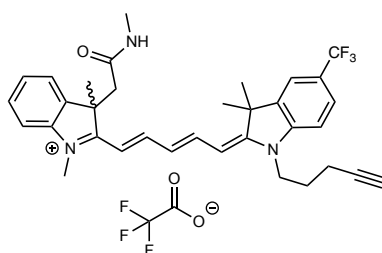

Compound **S2** was synthesized in 94% yield in the same manner as compound **22**, but with compound **9d** as starting material.

$^1\text{H}$  NMR (400 MHz,  $\text{CD}_3\text{OD}$ ):  $\delta$  = 8.25 (dd,  $J$  = 14.5, 11.9 Hz, 1H), 8.15 (t,  $J$  = 13.0 Hz, 1H), 7.70 (s, 1H), 7.65 (d,  $J$  = 8.2 Hz, 1H), 7.53 – 7.44 (m, 3H), 7.36 (td,  $J$  = 7.2, 1.4 Hz, 1H), 7.30 (d,  $J$  = 8.2 Hz, 1H), 6.63 (t,  $J$  = 12.5 Hz, 1H), 6.56 (d,  $J$  = 14.5 Hz, 1H), 6.21 (d,  $J$  = 13.1 Hz, 1H), 4.12 (t,  $J$  = 7.4 Hz, 2H), 3.78 (s, 3H), 3.50 (d,  $J$  = 16.0 Hz, 1H), 3.28 (d,  $J$  = 15.8 Hz, 1H), 2.49 (t,  $J$  = 2.7 Hz, 1H), 2.43 (s, 3H), 2.36 (td,  $J$  = 6.7, 2.7 Hz, 2H), 1.97 (p,  $J$  = 7.1 Hz, 2H), 1.74 (s, 6H), 1.69 (s, 3H) ppm.

$^{13}\text{C}\{^1\text{H}\}$  NMR (101 MHz,  $\text{CD}_3\text{OD}$ ):  $\delta$  = 178.6, 171.1, 170.6, 156.4, 152.7, 147.3, 144.8, 142.5, 141.1, 130.2, 127.6, 127.6, 127.3 (q,  $J$  = 4.0 Hz), 126.3 (q,  $J$  = 32 Hz), 124.6, 123.2, 120.4 (q,  $J$  = 3.5 Hz), 113.3, 110.6, 108.3, 102.9, 83.9, 71.3, 53.1, 46.7, 43.2, 32.5, 28.1, 27.1, 26.8, 26.0, 16.5 ppm.

HRMS (ESI) calcd for  $[\text{C}_{34}\text{H}_{37}\text{F}_3\text{N}_3\text{O}]^+$ : 560.28832, found 560.28772.

**2-((1*E*,3*E*)-5-((*E*)-1-(3-(1-(4-(((2-amino-9*H*-purin-6-yl)oxy)methyl)benzyl)-1*H*-1,2,3-triazol-4-yl)propyl)-3,3-dimethyl-5-(trifluoromethyl)indolin-2-ylidene)-penta-1,3-dien-1-yl)-1,3-dimethyl-3-(2-(methylamino)-2-oxoethyl)-3*H*-indol-1-ium 2,2,2-trifluoroacetate (**S3**)**

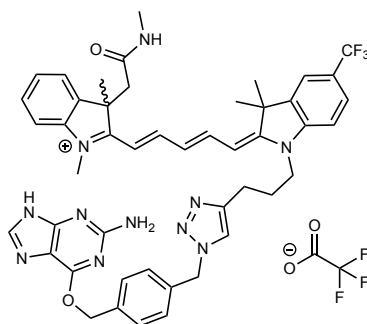

Compound **S3** was synthesized according to the general procedure for click reactions in 53% yield.

$^1\text{H}$  NMR (400 MHz,  $\text{CD}_3\text{OD}$ ):  $\delta$  = 8.26 (d,  $J$  = 12.2 Hz, 1H), 8.22 – 8.19 (m, 1H), 8.11 (t,  $J$  = 13.0 Hz, 1H), 7.83 (s, 1H), 7.68 (s, 1H), 7.59 – 7.55 (m, 3H), 7.50 (d,  $J$  = 7.3 Hz, 1H), 7.44 (t,  $J$  = 7.8 Hz, 2H), 7.40 – 7.33 (m, 3H), 7.16 (d,  $J$  = 8.4 Hz, 1H), 6.62 – 6.49 (m, 2H), 6.04 (d,  $J$  = 13.1 Hz, 1H), 5.61 (s, 4H), 4.04 (t,  $J$  = 7.5 Hz, 2H), 3.78 (s, 3H), 3.54 (d,  $J$  = 17.8 Hz, 1H), 3.26 (d,  $J$  = 15.9 Hz, 1H), 2.86 (t,  $J$  = 7.0 Hz, 2H), 2.42 (s, 3H), 2.16 (p,  $J$  = 7.2 Hz, 2H), 1.70 (s, 6H), 1.68 (s, 3H) ppm.

HRMS (ESI) calcd for  $[\text{C}_{47}\text{H}_{49}\text{F}_3\text{N}_{11}\text{O}_2]^+$ : 856.40228, found 856.40135.

**2-((1*E*,3*E*,5*E*)-7-((*E*)-3,3-dimethyl-1-(pent-4-yn-1-yl)indolin-2-ylidene)hepta-1,3,5-trien-1-yl)-3-(2-methoxy-2-oxoethyl)-1,3-dimethyl-3*H*-indol-1-ium 2,2,2-trifluoroacetate (**S4**)**

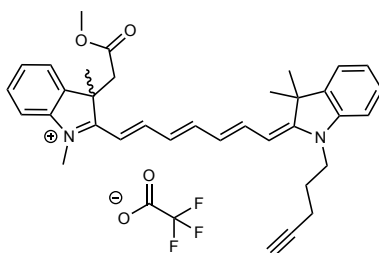

**S4** was synthesized in 57% yield according to the general procedure for compounds **9**, but with heating to 100 °C in the microwave for 30 min after addition of the second indoleninium building block.

$^1\text{H}$  NMR (400 MHz,  $\text{CD}_3\text{OD}$ ):  $\delta$  = 7.90 (td,  $J$  = 13.2, 4.5 Hz, 2H), 7.58 (t,  $J$  = 12.8 Hz, 1H), 7.49 – 7.36 (m, 4H), 7.32 – 7.20 (m, 4H), 6.62 – 6.47 (m, 2H), 6.32 (t,  $J$  = 14.2 Hz, 2H), 4.17 (t,  $J$  = 7.4 Hz, 2H), 3.64 (s, 3H), 3.51 (d,  $J$  = 17.3 Hz, 1H), 3.43 (d,  $J$  = 17.6 Hz, 1H), 3.40 (s, 3H), 2.49 (t,  $J$  = 2.7 Hz, 1H), 2.36 (td,  $J$  = 6.6, 2.6 Hz, 2H), 1.99 (p,  $J$  = 7.1 Hz, 2H), 1.69 (s, 6H), 1.66 (s, 3H) ppm.

$^{13}\text{C}\{^1\text{H}\}$  NMR (101 MHz,  $\text{CD}_3\text{OD}$ ):  $\delta$  = 173.1, 172.4, 171.3, 157.6, 152.8, 152.3, 145.4, 143.8, 142.2, 140.1, 130.1, 129.7, 127.2, 126.9, 126.2, 125.7, 123.4, 123.1, 119.0, 116.1, 111.9, 111.4, 83.8, 71.3, 52.1, 51.5, 50.1, 45.0, 43.6, 31.7, 28.1, 27.5, 27.2, 16.5 ppm.

HRMS (ESI) calcd for  $[\text{C}_{35}\text{H}_{39}\text{N}_2\text{O}_2]^+$ : 519.30060, found 519.30015.

**2-((1*E*,3*E*,5*E*)-7-((*E*)-3,3-dimethyl-1-(pent-4-yn-1-yl)indolin-2-ylidene)hepta-1,3,5-trien-1-yl)-1,3-dimethyl-3-(2-(methylamino)-2-oxoethyl)-3*H*-indol-1-ium 2,2,2-trifluoroacetate (**S5**)**

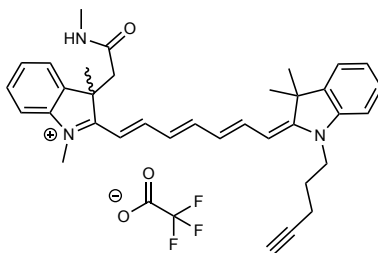

Compound **S5** was synthesized in 96% yield in the same manner as compound **22**, but with compound **S4** as starting material.

$^1\text{H}$  NMR (400 MHz,  $\text{CD}_3\text{OD}$ ):  $\delta$  = 7.93 (t,  $J$  = 13.1 Hz, 1H), 7.82 (t,  $J$  = 13.0 Hz, 1H), 7.54 (t,  $J$  = 12.6 Hz, 1H), 7.46 – 7.40 (m, 3H), 7.37 – 7.32 (m, 2H), 7.28 (td,  $J$  = 7.5, 1.1 Hz, 1H), 7.22 – 7.15 (m, 2H), 6.57 (t,  $J$  = 12.5 Hz, 1H), 6.49 (t,  $J$  = 12.6 Hz, 1H), 6.41 (d,  $J$  = 14.2 Hz, 1H), 6.20 (d,  $J$  = 13.3 Hz, 1H), 4.12 (t,  $J$  = 7.4 Hz, 2H), 3.68 (s, 3H), 3.31 (d,  $J$  = 15.4 Hz, 1H), 3.21 (d,  $J$  = 15.7 Hz, 1H), 2.48 (t,  $J$  = 2.7 Hz, 1H), 2.44 (s, 3H), 2.35 (td,  $J$  = 6.7, 2.6 Hz, 2H), 1.97 (p,  $J$  = 6.7 Hz, 2H), 1.68 (s, 6H), 1.66 (s, 3H) ppm.

$^{13}\text{C}\{^1\text{H}\}$  NMR (101 MHz,  $\text{CD}_3\text{OD}$ ):  $\delta$  = 175.2, 171.2, 170.8, 157.0, 153.6, 150.8, 145.1, 144.0, 141.9, 140.6, 130.0, 129.6, 127.3, 126.5, 125.1, 123.3, 123.2, 112.4, 110.9, 83.9, 71.2, 52.4, 46.8, 43.3, 32.0, 28.2, 27.4, 27.1, 26.0, 16.6 ppm.

HRMS (ESI) calcd for  $[\text{C}_{35}\text{H}_{40}\text{N}_3\text{O}]^+$ : 518.31659, found 518.31596.

**2-((1*E*,3*E*,5*E*)-7-((*E*)-1-(3-(1-(4-(((2-amino-9*H*-purin-6-yl)oxy)methyl)benzyl)-1*H*-1,2,3-triazol-4-yl)propyl)-3,3-dimethylindolin-2-ylidene)hepta-1,3,5-trien-1-yl)-1,3-dimethyl-3-(2-(methylamino)-2-oxoethyl)-3*H*-indol-1-ium 2,2,2-trifluoroacetate (**S6**)**

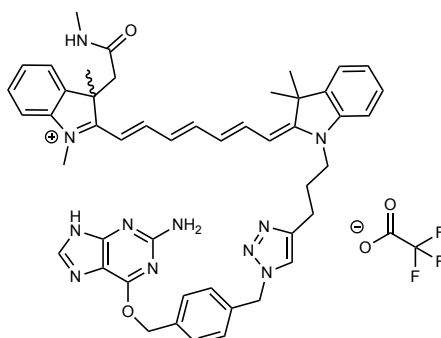

Compound **S6** was synthesized according to the general procedure for Click reactions with 43% yield.

$^1\text{H}$  NMR (400 MHz,  $\text{CD}_3\text{OD}$ ):  $\delta$  = 8.21 (s, 1H), 7.91 (t,  $J$  = 13.3 Hz, 1H), 7.81 (s, 1H), 7.77 – 7.72 (m, 1H), 7.57 (d,  $J$  = 8.2 Hz, 2H), 7.44 (d,  $J$  = 7.8 Hz, 2H), 7.42 – 7.35 (m, 4H), 7.34 – 7.25 (m, 3H), 7.14 (t,  $J$  = 7.4 Hz, 1H), 7.07 (d,  $J$  = 7.9 Hz, 1H), 6.52 (t,  $J$  = 12.6 Hz, 1H), 6.44 – 6.35 (m, 2H), 6.04 (d,  $J$  = 13.4 Hz, 1H), 5.62 (s, 2H), 5.60 (s, 2H), 4.04 (t,  $J$  = 7.2 Hz, 2H), 3.67 (s, 3H), 3.46 (d,  $J$  = 15.8 Hz, 1H), 3.20 (d,  $J$  = 15.7 Hz, 1H), 2.85 (t,  $J$  = 7.2 Hz, 2H), 2.43 (s, 3H), 2.16 (p,  $J$  = 7.1 Hz, 2H), 1.65 (s, 3H), 1.64 (s, 6H) ppm.

HRMS (ESI) calcd for  $[\text{C}_{48}\text{H}_{52}\text{N}_{11}\text{O}_2]^+$ : 814.43000, found 814.43016.

**2-((1*E*,3*E*)-5-((*E*)-3,3-dimethyl-1-(pent-4-yn-1-yl)-5-(trifluoromethyl)indolin-2-ylidene)penta-1,3-dien-1-yl)-1-(2-hydroxyethyl)-3,3-dimethyl-3*H*-indol-1-ium 2,2,2-trifluoroacetate (**S7**)**

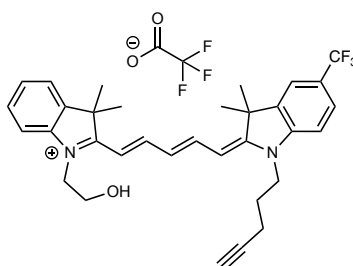

Compound **S7** was synthesized in 46% yield according to the general procedure for compounds **2**, but with heating to 110 °C in the microwave for 30 min after addition of the second indoleninium building block.

$^1\text{H}$  NMR (400 MHz,  $\text{CD}_3\text{OD}$ ):  $\delta$  = 8.36 (dd,  $J$  = 14.2, 11.9 Hz, 1H), 8.21 (t,  $J$  = 13.0 Hz, 1H), 7.73 (s, 1H), 7.66 (d,  $J$  = 8.4 Hz, 1H), 7.57 (d,  $J$  = 7.3 Hz, 1H), 7.47 (d,  $J$  = 3.7 Hz, 2H), 7.40 – 7.32 (m, 2H), 6.67 – 6.58 (m, 2H), 6.26 (d,  $J$  = 13.1 Hz, 1H), 4.37 (t,  $J$  = 5.3 Hz, 2H), 4.15 (t,  $J$  = 7.4 Hz, 2H), 3.98 (t,  $J$  = 5.3 Hz, 2H), 2.49 (t,  $J$  = 2.6 Hz,



1H), 2.37 (td,  $J = 6.6, 2.7$  Hz, 2H), 1.98 (p,  $J = 6.7$  Hz, 2H), 1.78 (s, 6H), 1.75 (s, 6H) ppm.

$^{13}\text{C}\{^1\text{H}\}$  NMR (101 MHz,  $\text{CD}_3\text{OD}$ ):  $\delta = 179.2, 171.6, 157.3, 153.7, 147.1, 143.6, 143.4, 142.7, 129.8, 127.8, 127.6, 127.3$  (q,  $J = 3.9$  Hz), 126.6 (q,  $J = 32.8$  Hz), 124.6, 123.5, 120.4 (q,  $J = 3.9$  Hz), 113.7, 110.9, 108.0, 103.3, 83.9, 71.3, 60.2, 51.7, 43.4, 28.0, 27.6, 26.9, 16.5 ppm.

HRMS (ESI) calcd for  $[\text{C}_{33}\text{H}_{36}\text{F}_3\text{N}_2\text{O}]^+$ : 533.27742, found 533.27693.

**2-((1*E*,3*E*)-5-((*E*)-1-(3-(1-(4-(((2-amino-9*H*-purin-6-yl)oxy)methyl)benzyl)-1*H*-1,2,3-triazol-4-yl)propyl)-3,3-dimethyl-5-(trifluoromethyl)indolin-2-ylidene)-penta-1,3-dien-1-yl)-1-(2-hydroxyethyl)-3,3-dimethyl-3*H*-indol-1-ium 2,2,2-trifluoroacetate (**S8**)**

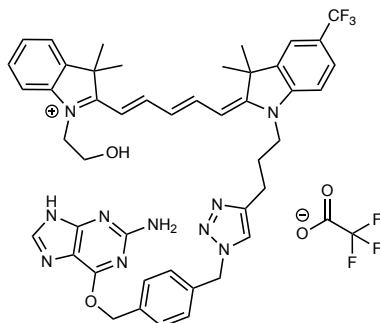

Compound **S8** was synthesized according to the general procedure for Click reactions with 58% yield.

$^1\text{H}$  NMR (400 MHz,  $\text{CD}_3\text{OD}$ ):  $\delta = 8.34$  (dd,  $J = 14.1, 11.8$  Hz, 1H), 8.19 (t,  $J = 13.0$  Hz, 2H), 7.83 (s, 1H), 7.71 (d,  $J = 2.0$  Hz, 1H), 7.61 – 7.54 (m, 4H), 7.48 – 7.44 (m, 2H), 7.39 – 7.35 (m, 3H), 7.20 (d,  $J = 8.4$  Hz, 1H), 6.58 (dd,  $J = 13.5, 10.0$  Hz, 2H), 6.12 (d,  $J = 13.1$  Hz, 1H), 5.61 (s, 4H), 4.36 (t,  $J = 5.3$  Hz, 2H), 4.08 (t,  $J = 7.6$  Hz, 2H), 3.98 (t,  $J = 5.3$  Hz, 2H), 2.86 (t,  $J = 7.3$  Hz, 2H), 2.17 (p,  $J = 7.6$  Hz, 2H), 1.77 (s, 6H), 1.72 (s, 6H) ppm.

HRMS (ESI) calcd for  $[\text{C}_{46}\text{H}_{48}\text{F}_3\text{N}_{10}\text{O}_2]^+$ : 829.39083, found 829.39070.

## References

1. Gibson, D. G. *et al.* Enzymatic assembly of DNA molecules up to several hundred kilobases. *Nat. Methods* **6**, 343–345 (2009).
2. Kim, I. K. & Erickson, K. L. Models for uleine-alkaloid biogenesis. *Tetrahedron* **27**, 3979–3991 (1971).
3. Owens, E. A., Bruschi, N., Tawney, J. G. & Henary, M. A microwave-assisted and environmentally benign approach to the synthesis of near-infrared fluorescent pentamethine cyanine dyes. *Dyes Pigm.* **113**, 27–37 (2015).
4. Wolf, N., Kersting, L., Herok, C., Mihm, C. & Seibel, J. High-yielding water-soluble asymmetric cyanine dyes for labeling applications. *J. Org. Chem.* **85**, 9751–9760 (2020).
5. Trost, B. M., Breder, A. & Kai, B. Atom-Economical Synthesis of Functionalized Cycloalkanes via Catalytic Redox Cycloisomerization of Propargyl Alcohols. *Org. Lett.* **14**, 1708–1711 (2012).
6. Li, H., Luan, Z.-J., Zheng, G.-W. & Xu, J.-H. Efficient Synthesis of Chiral Indolines using an Imine Reductase from *Paenibacillus lactis*. *Adv. Synth. Catal.* **357**, 1692–1696 (2015).
7. Keppler, A. *et al.* A general method for the covalent labeling of fusion proteins with small molecules in vivo. *Nat. Biotechnol* **21**, 86–89 (2003).
8. Meng, G. *et al.* Modular click chemistry libraries for functional screens using a diazotizing reagent. *Nature* **574**, 86–89 (2019).

## NMR spectra

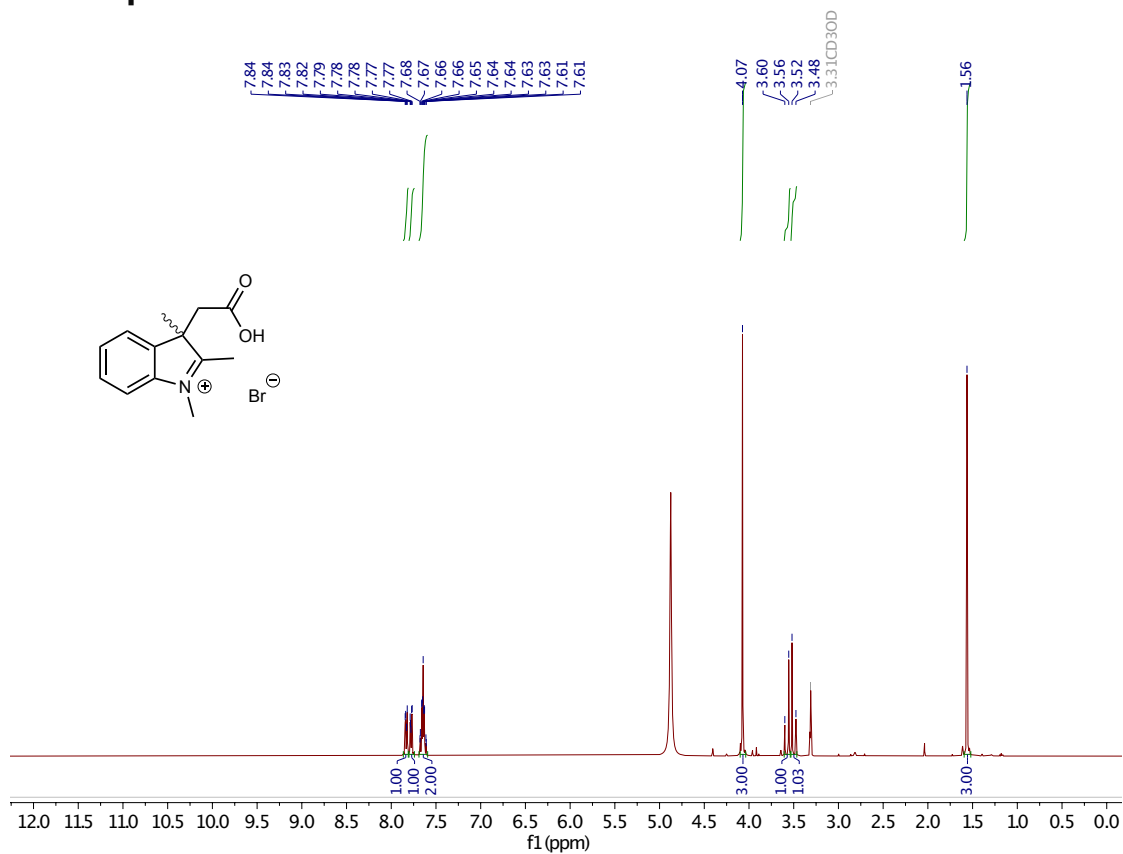

Figure 6. <sup>1</sup>H-NMR of 6.

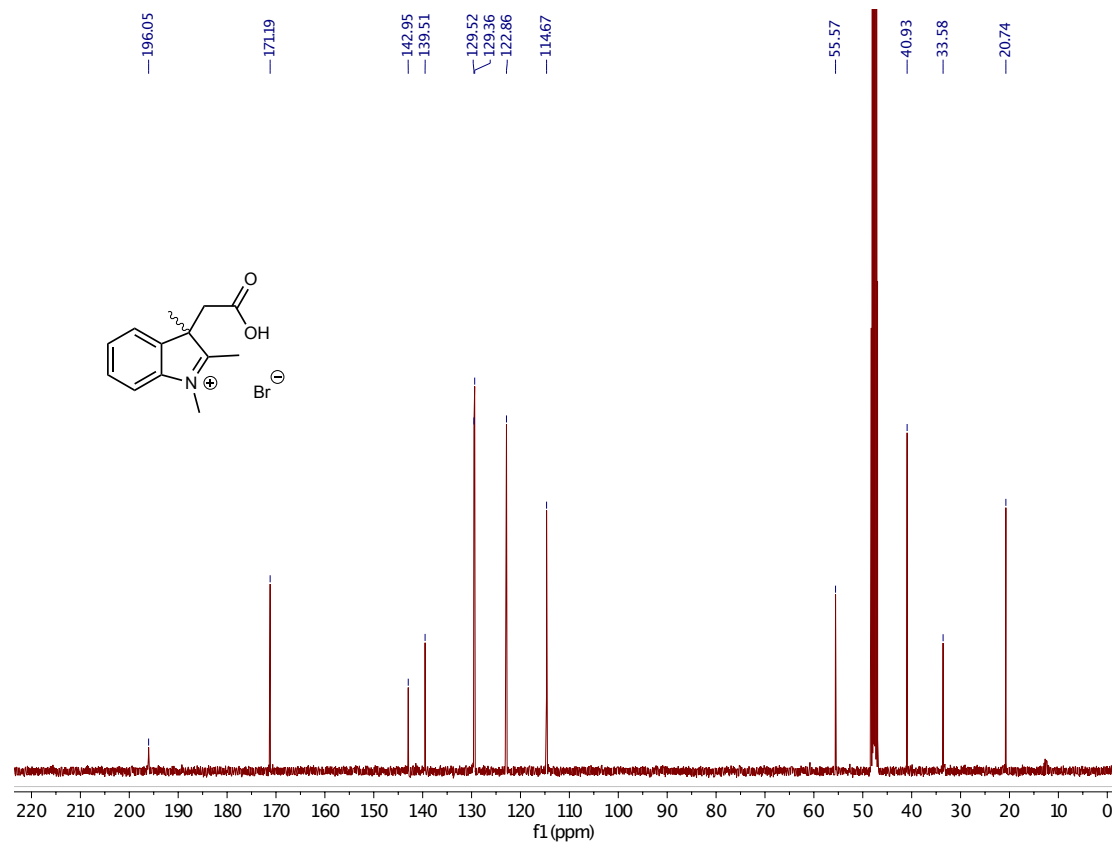

Figure 7. <sup>13</sup>C-NMR of 6.

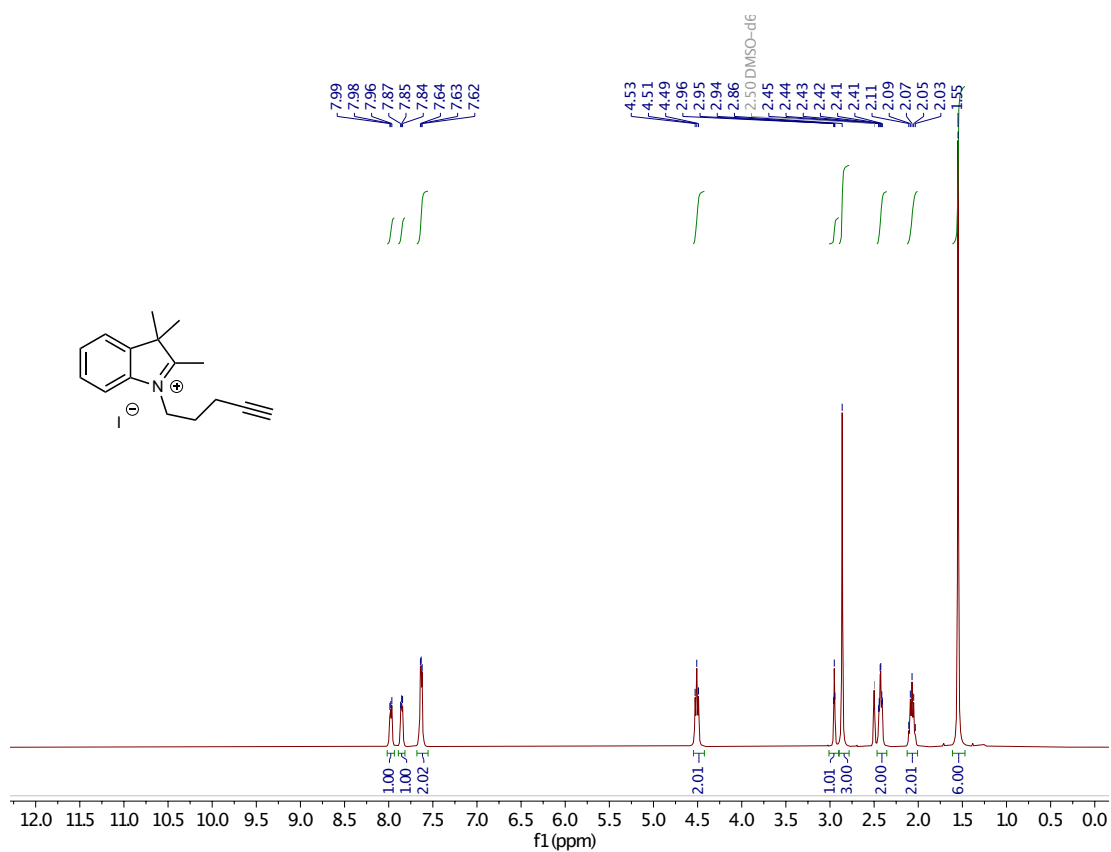

Figure 8.  $^1\text{H-NMR}$  of 7c.

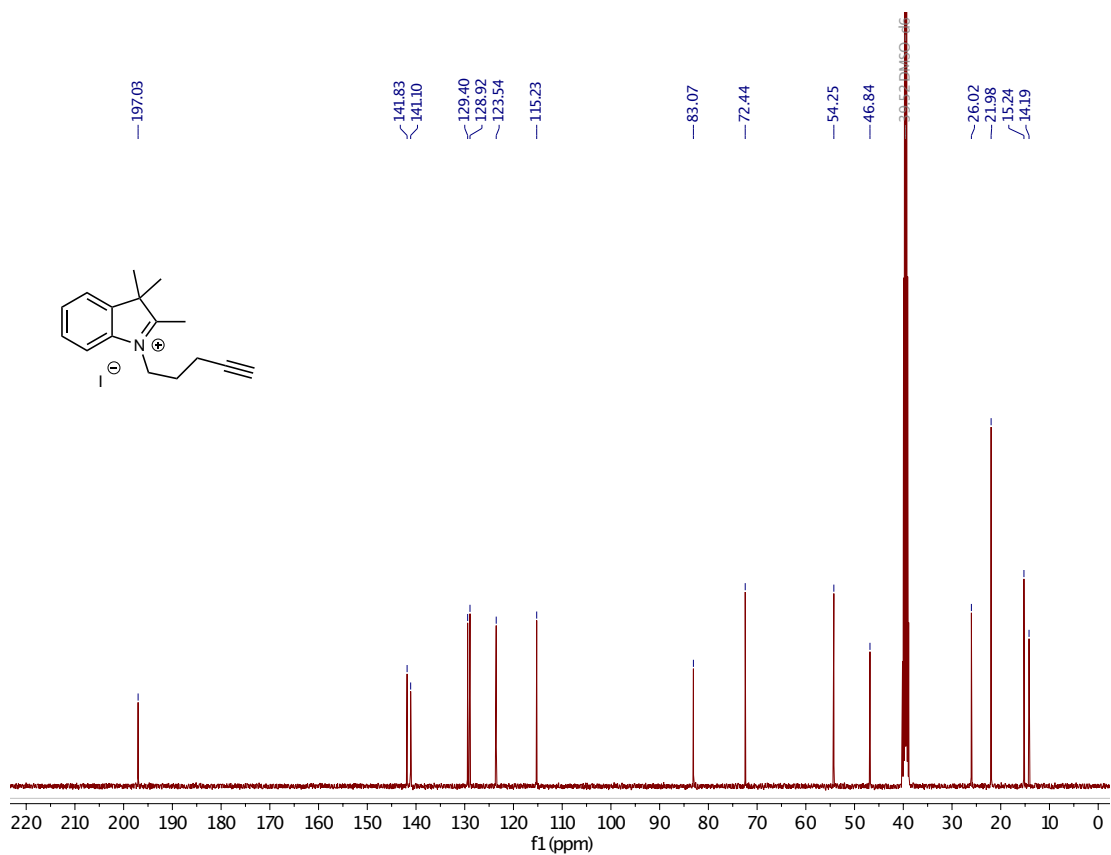

Figure 9.  $^{13}\text{C-NMR}$  of 7c.

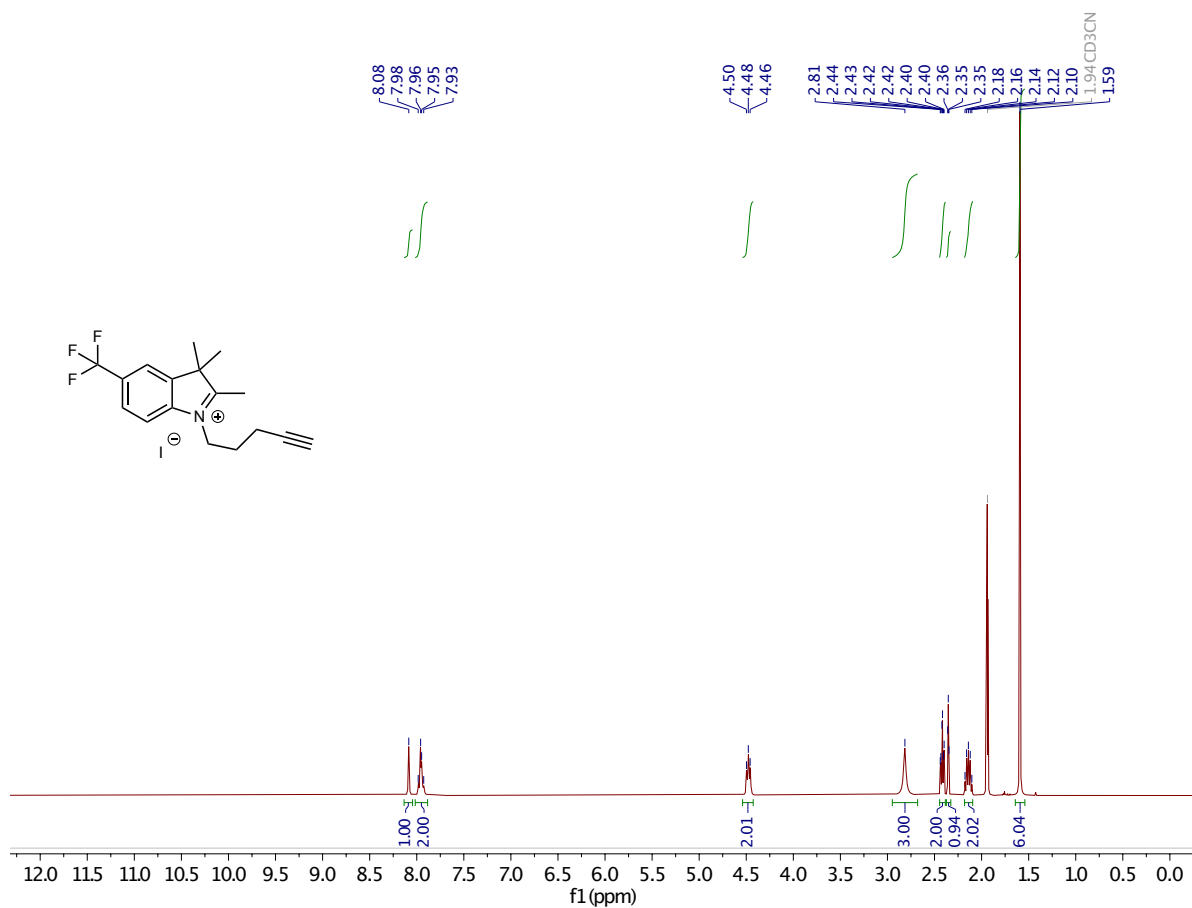

Figure 10. <sup>1</sup>H-NMR of 7d.

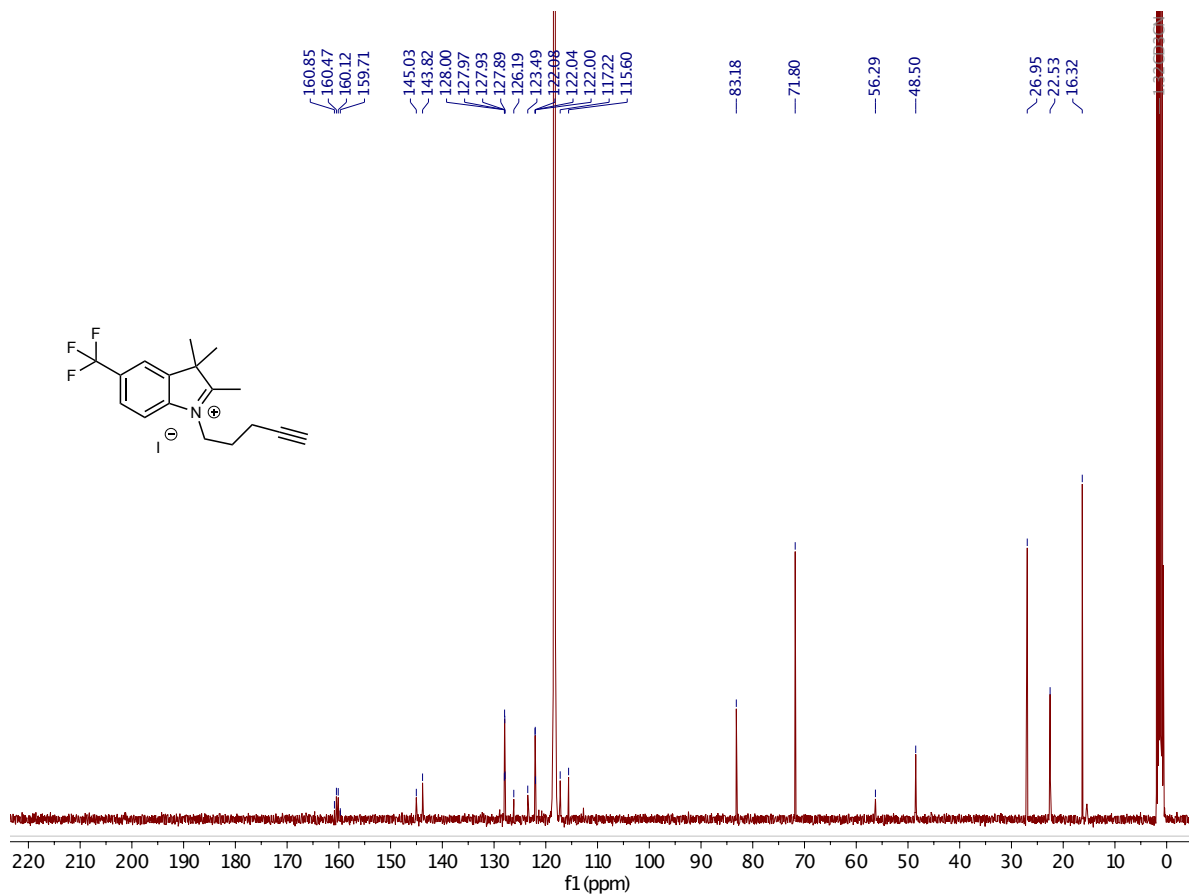

Figure 11. <sup>13</sup>C-NMR of 7d.

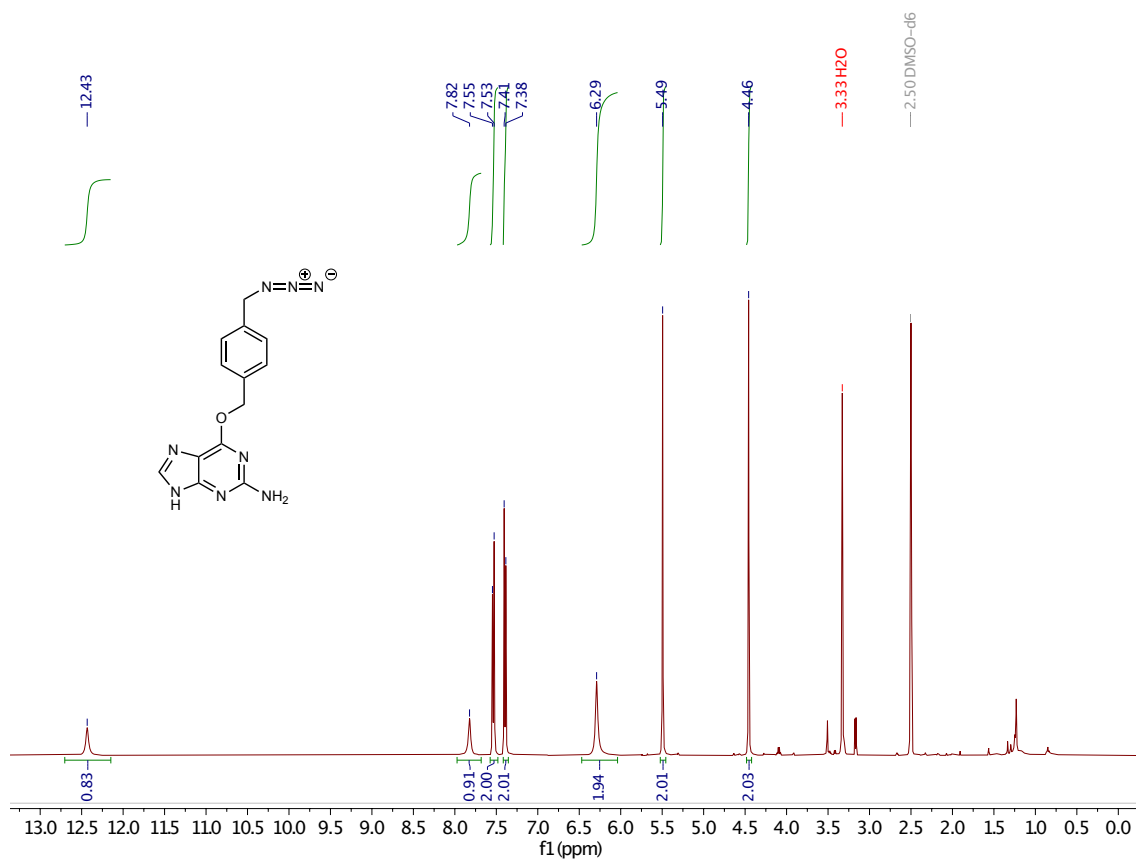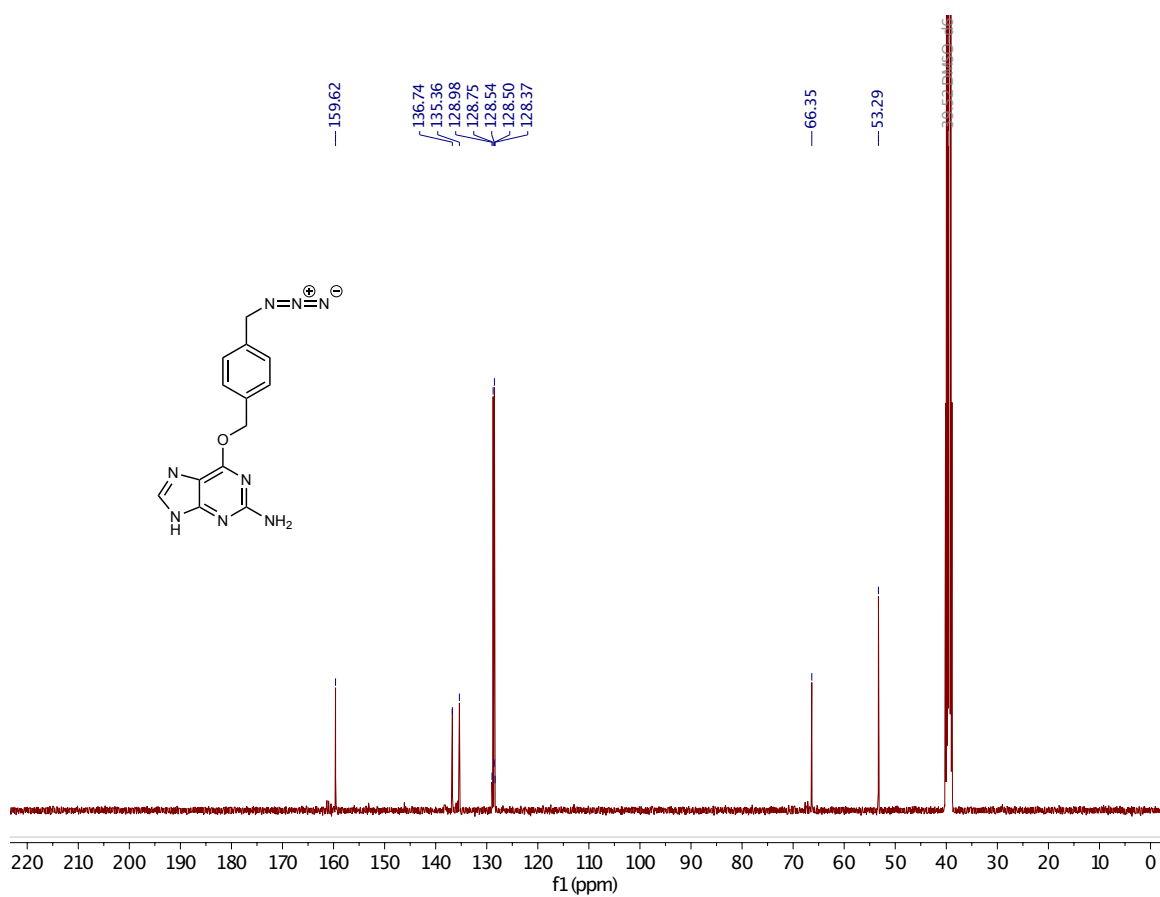

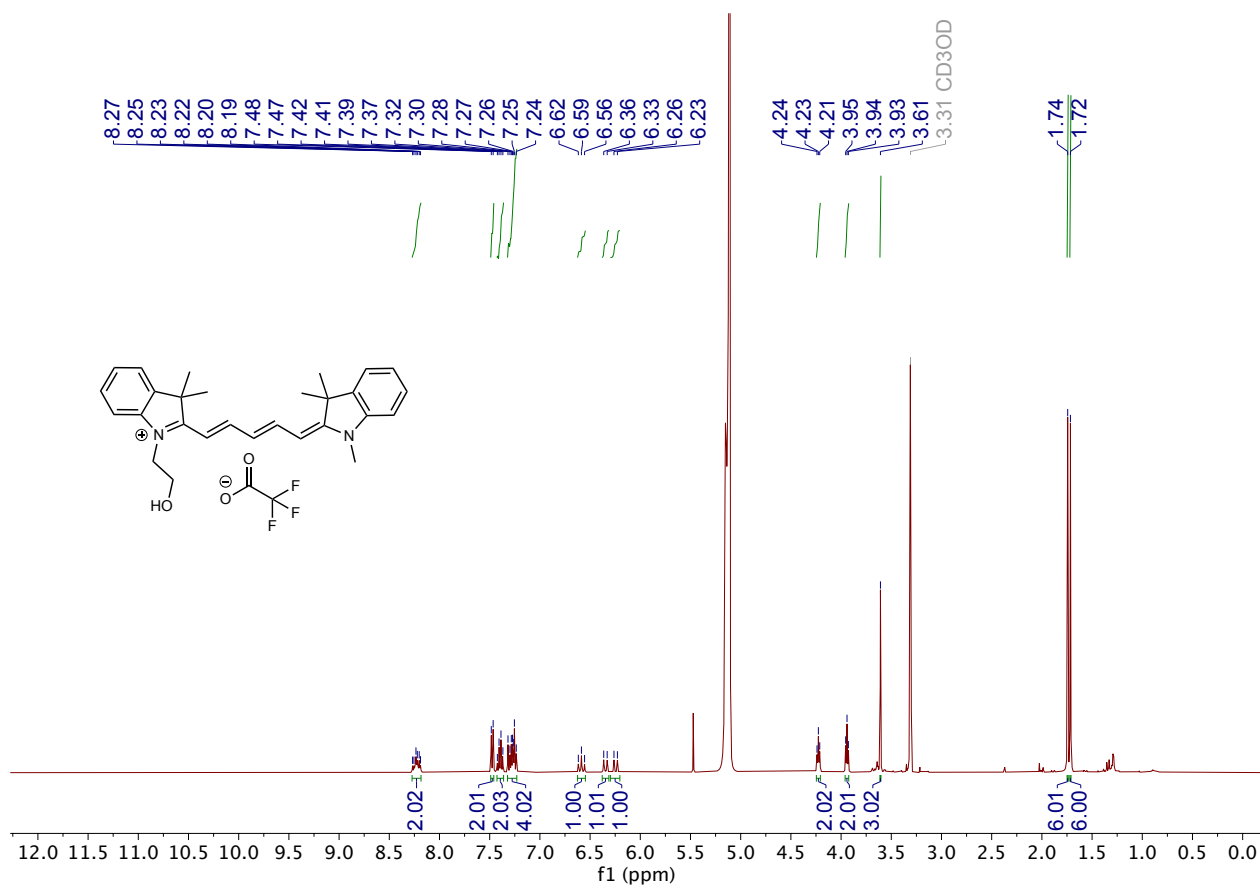

Figure 14. <sup>1</sup>H-NMR of 2a.

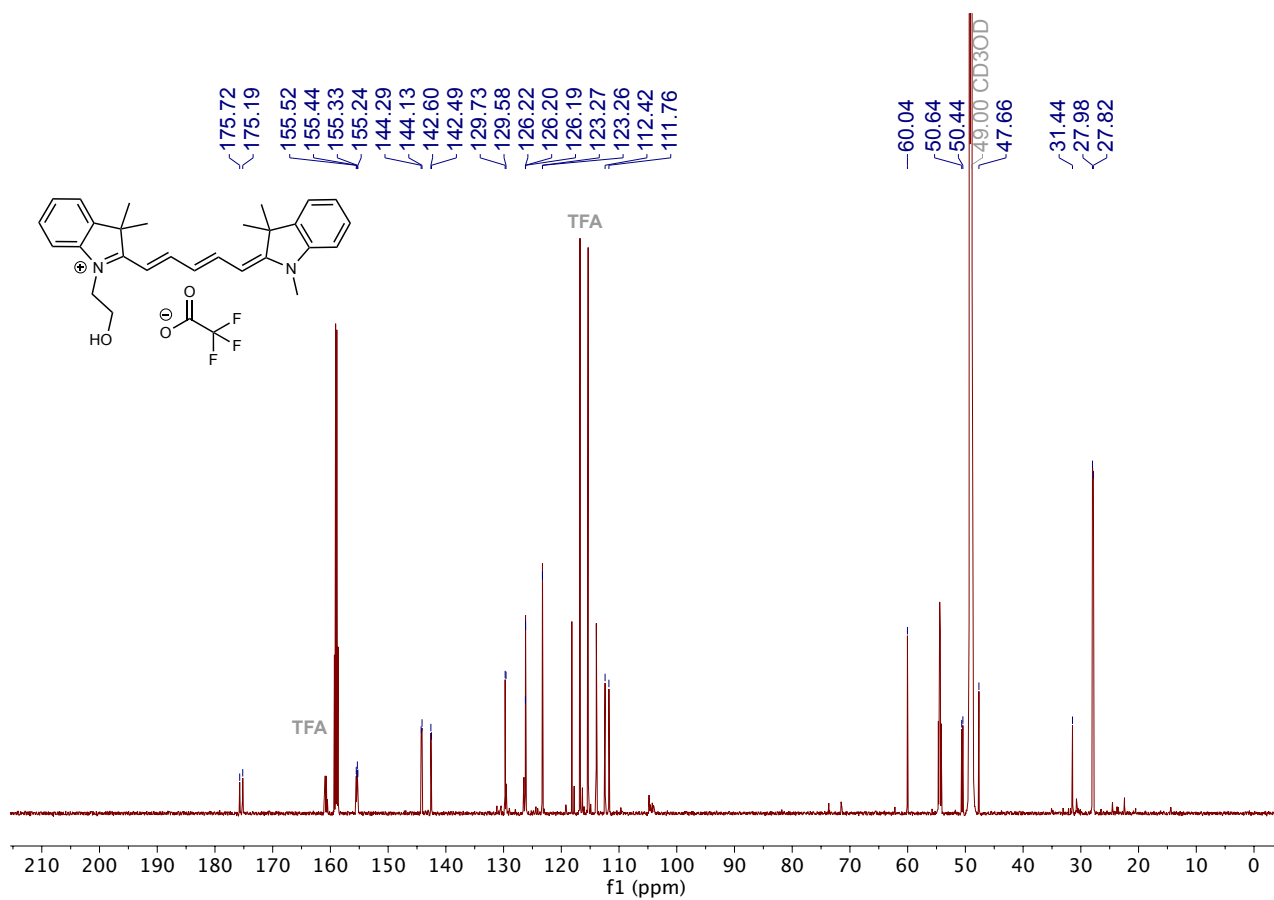

Figure 15. <sup>13</sup>C-NMR of 2a.





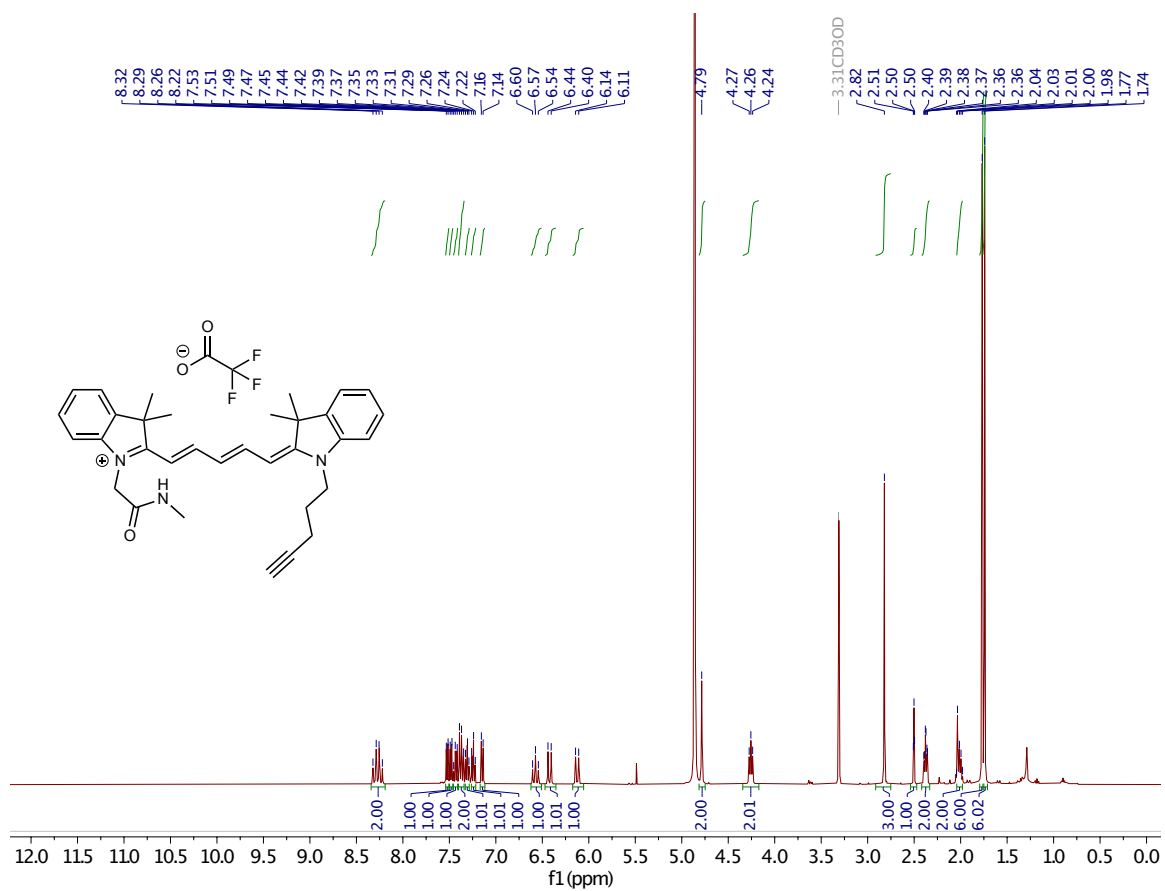

Figure 18.  $^1\text{H-NMR}$  of 14.

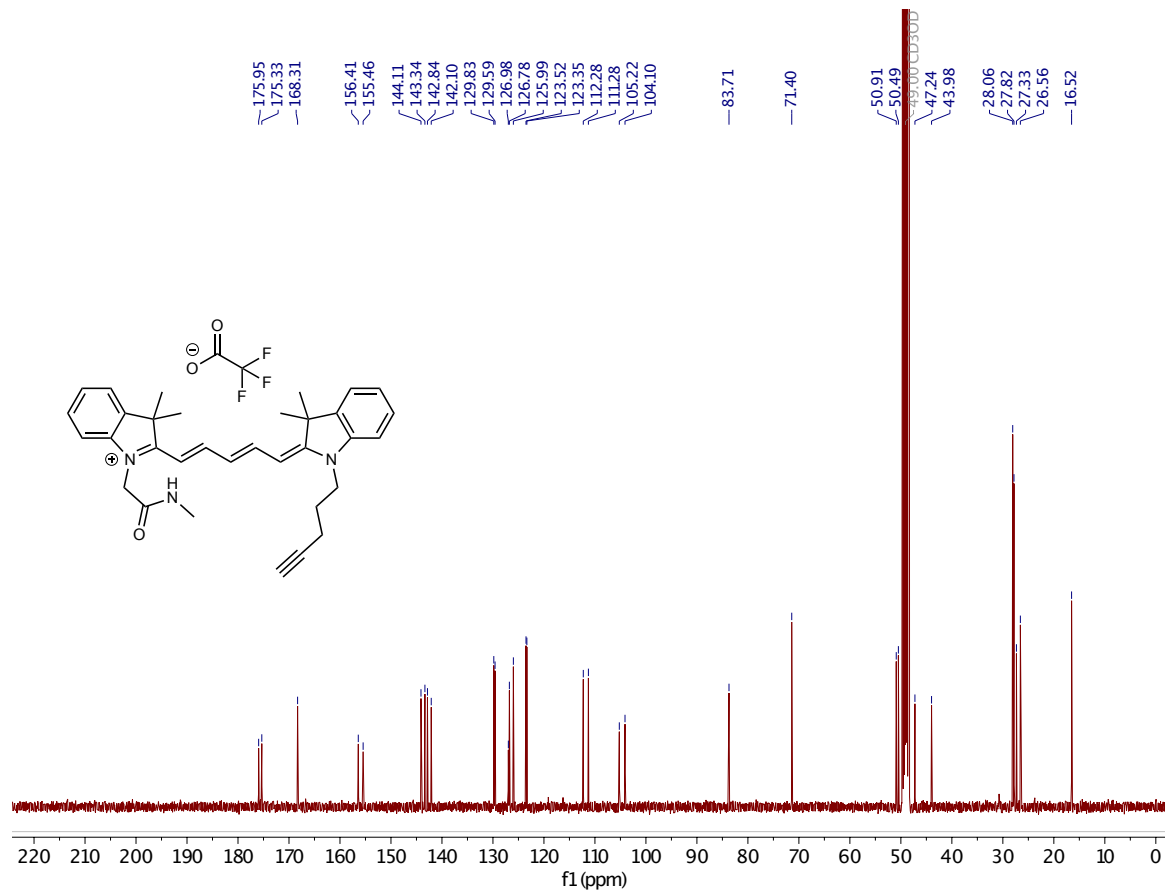

Figure 19.  $^{13}\text{C-NMR}$  of 14.



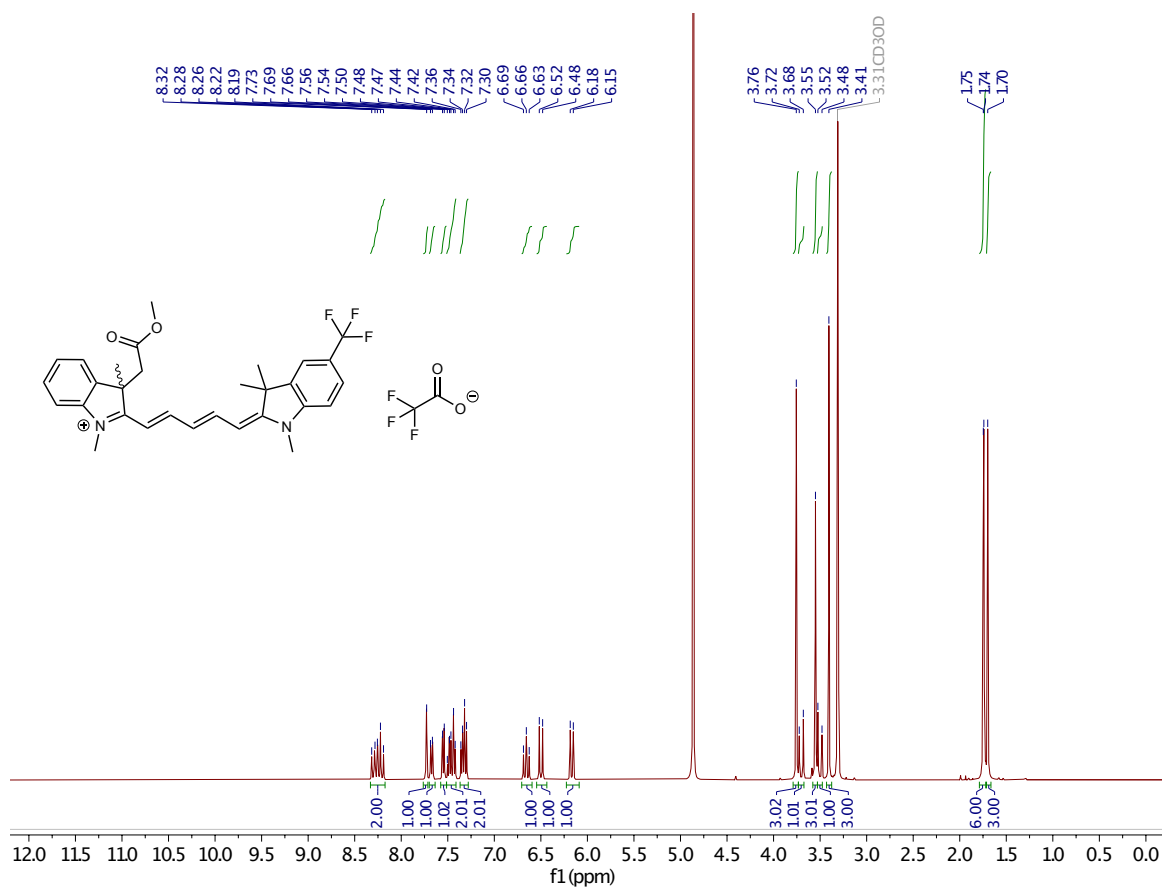

Figure 22. <sup>1</sup>H-NMR of 9b

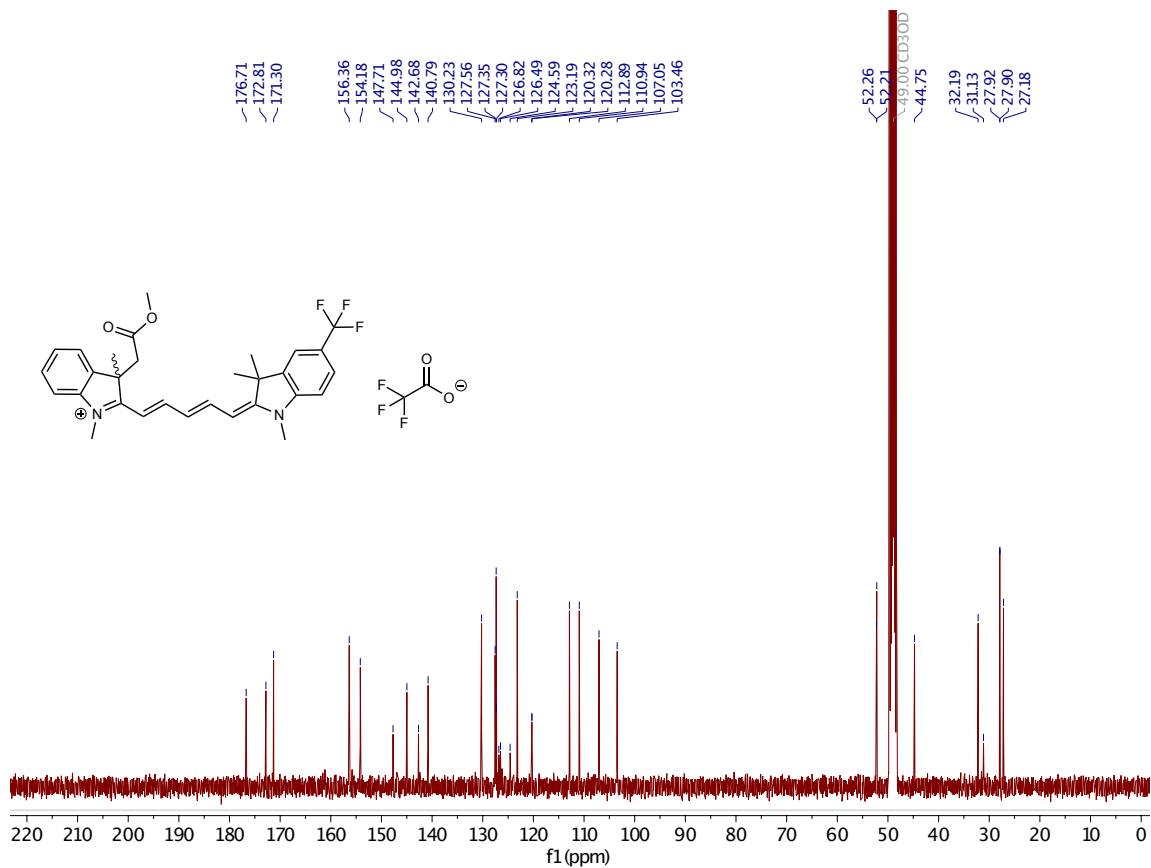

Figure 23. <sup>13</sup>C-NMR of 9b.

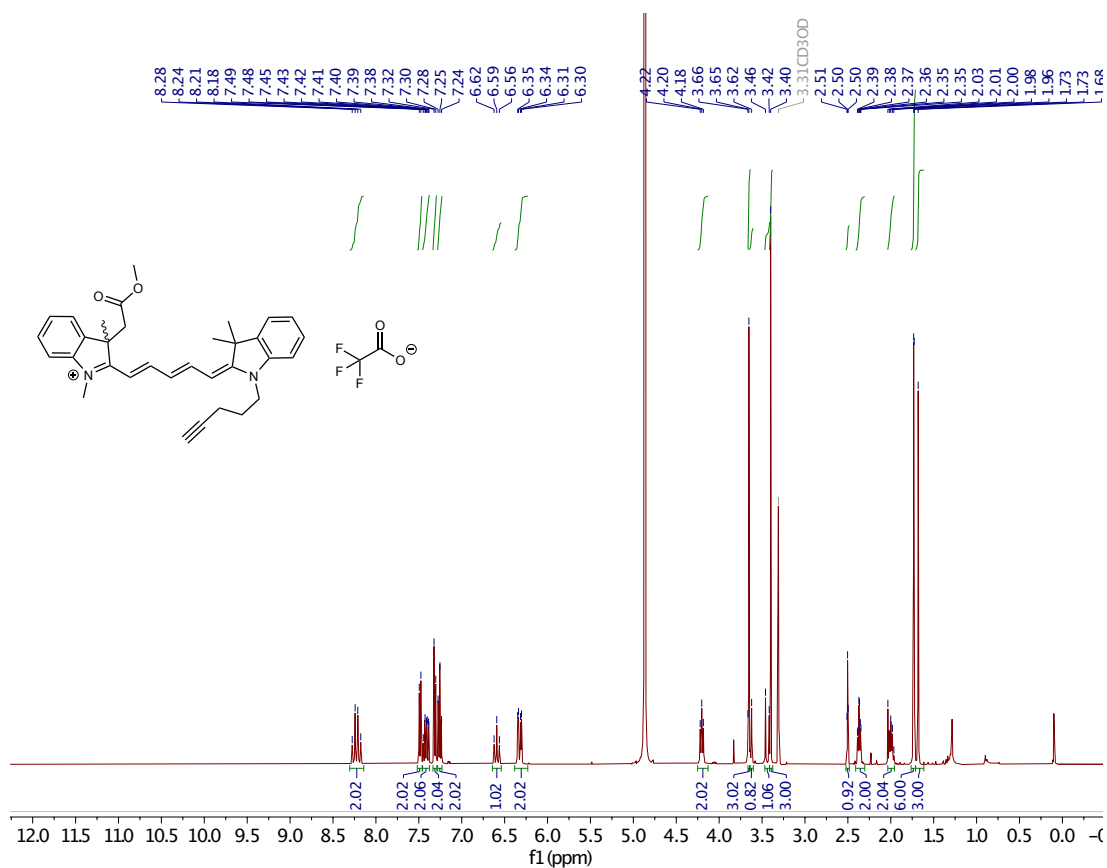

Figure 24. <sup>1</sup>H-NMR of **9c**.

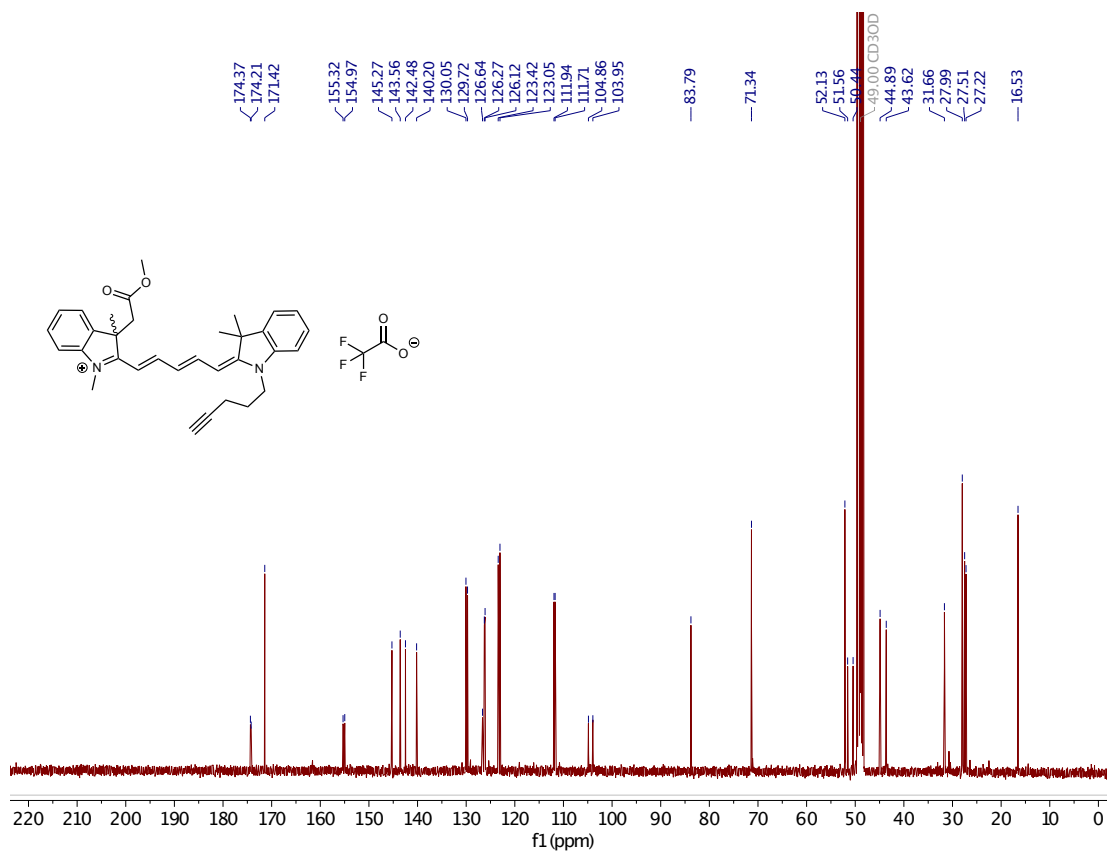

Figure 25. <sup>13</sup>C-NMR of **9c**.

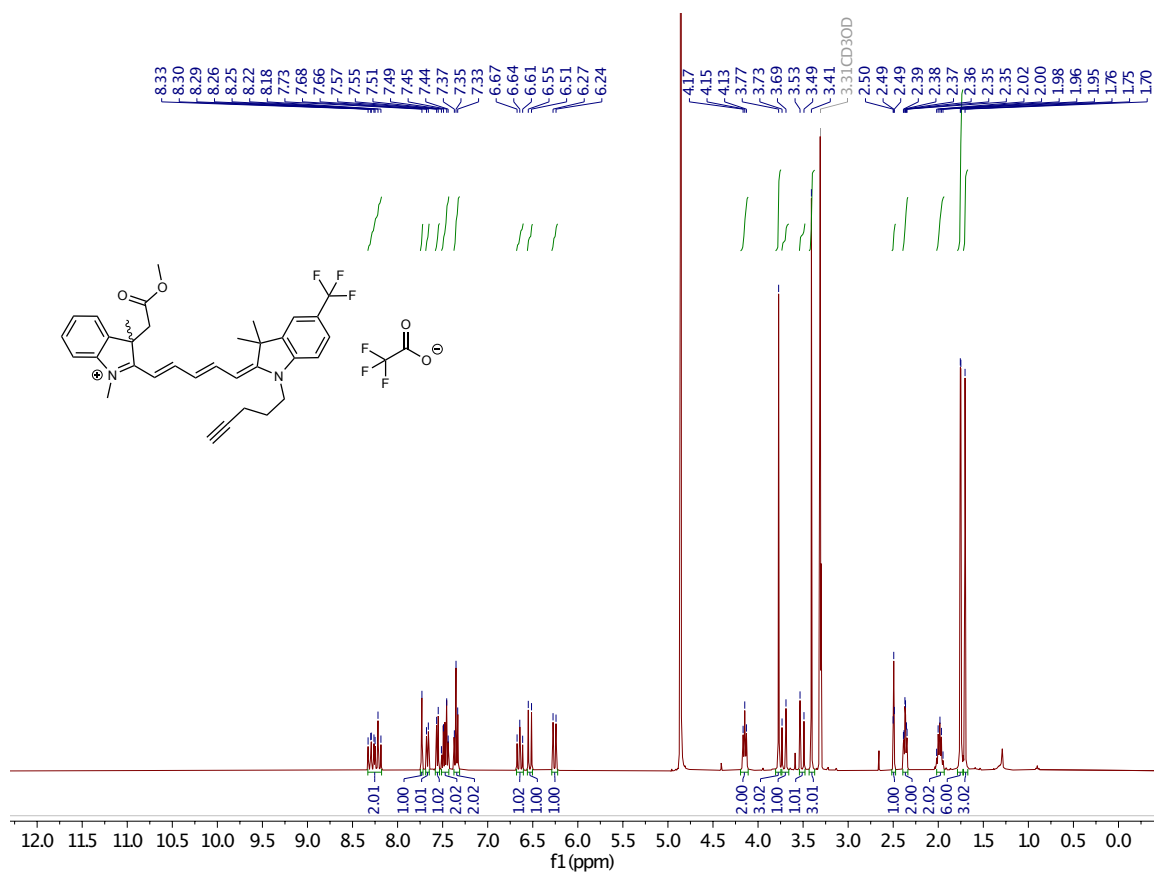

Figure 26. <sup>1</sup>H-NMR of 9d.

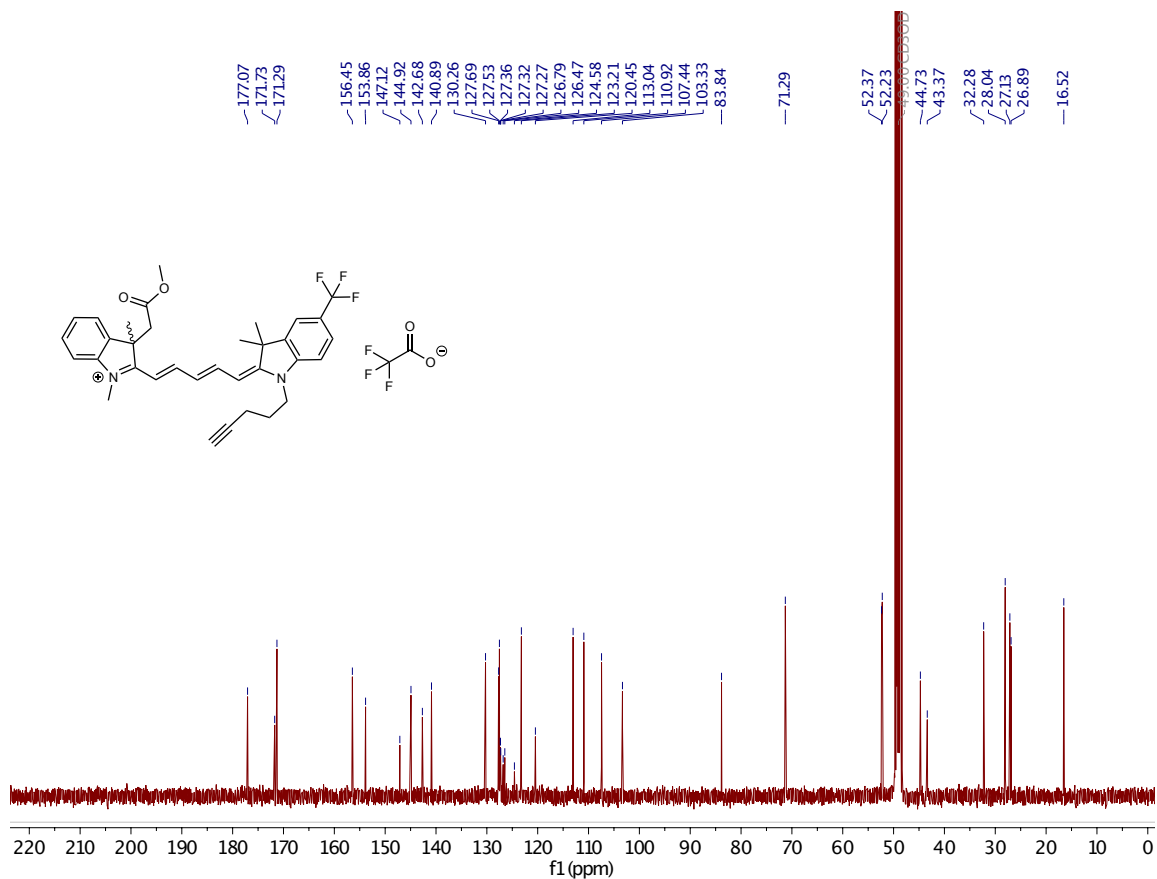

Figure 27. <sup>13</sup>C-NMR of 9d.

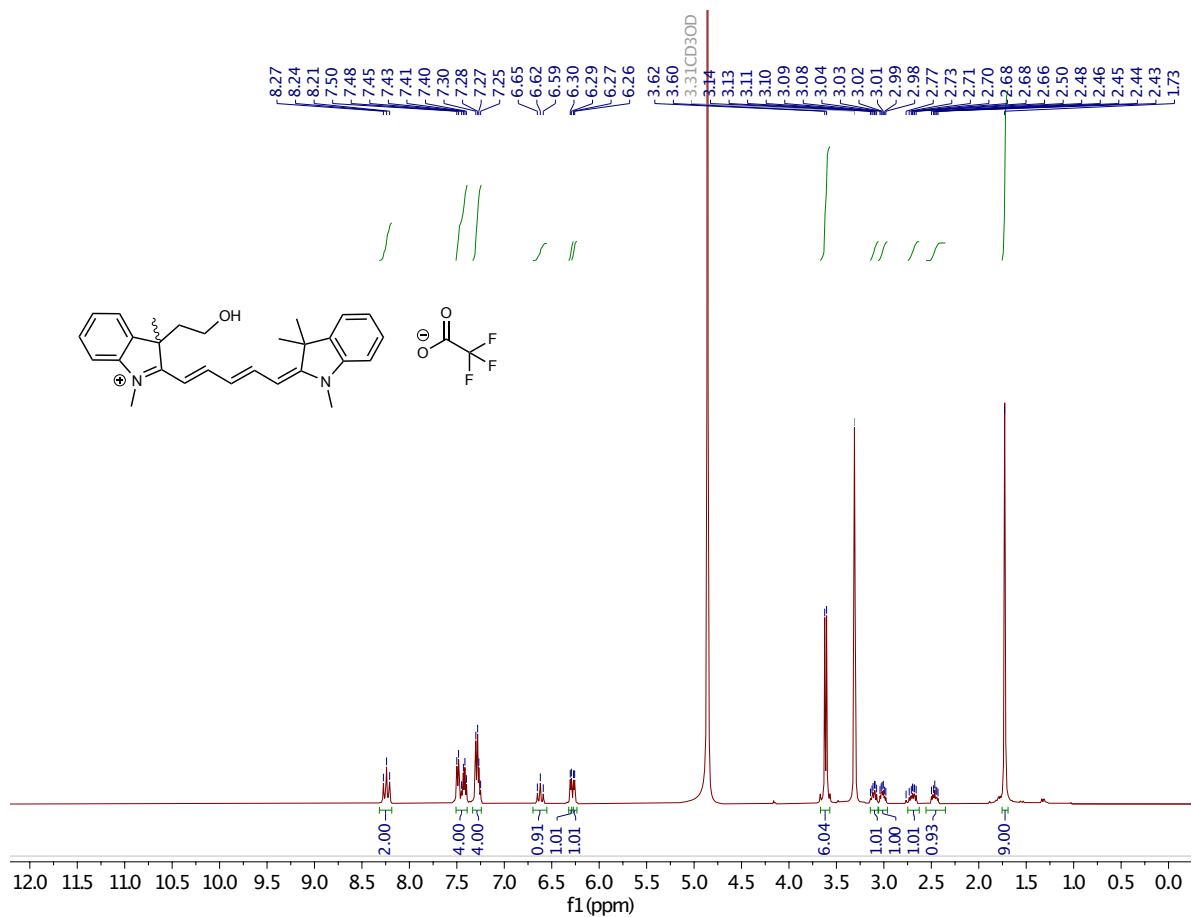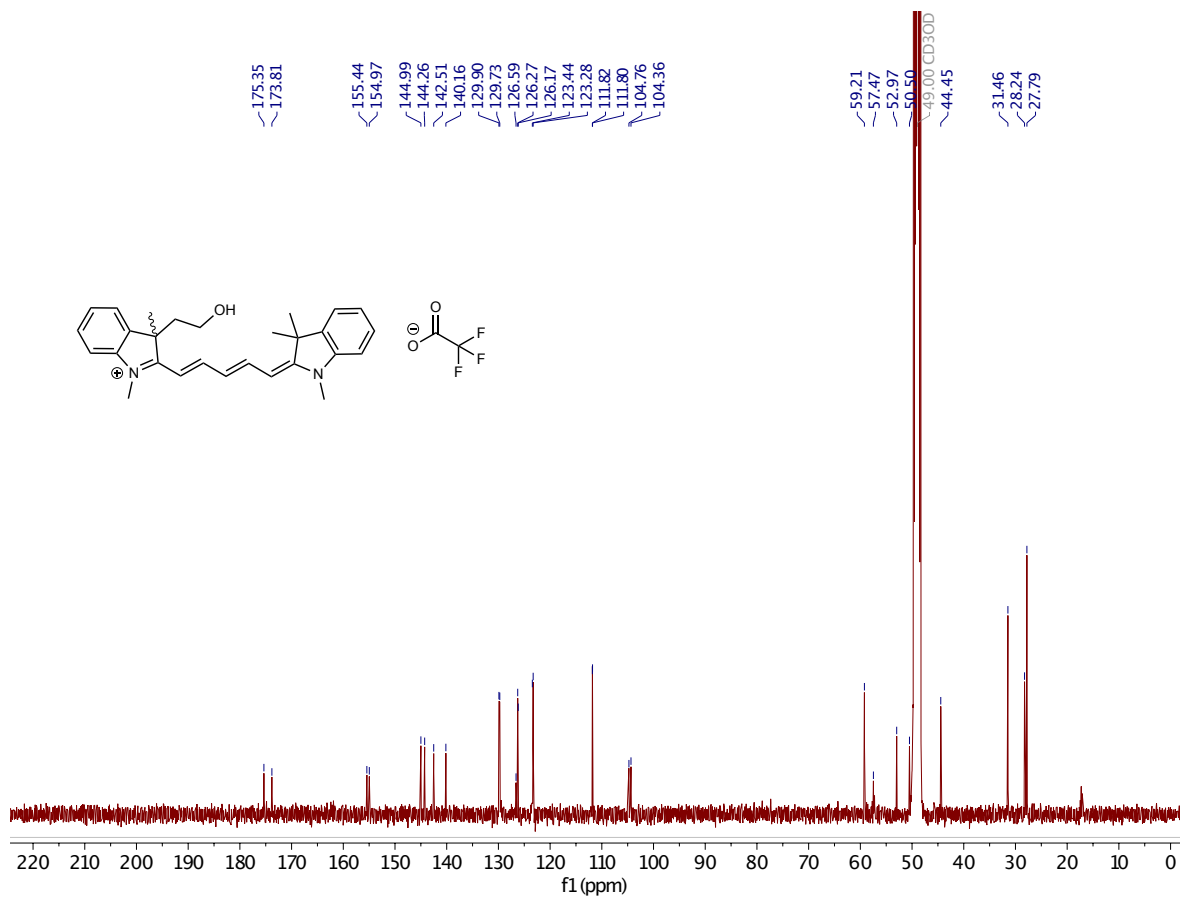

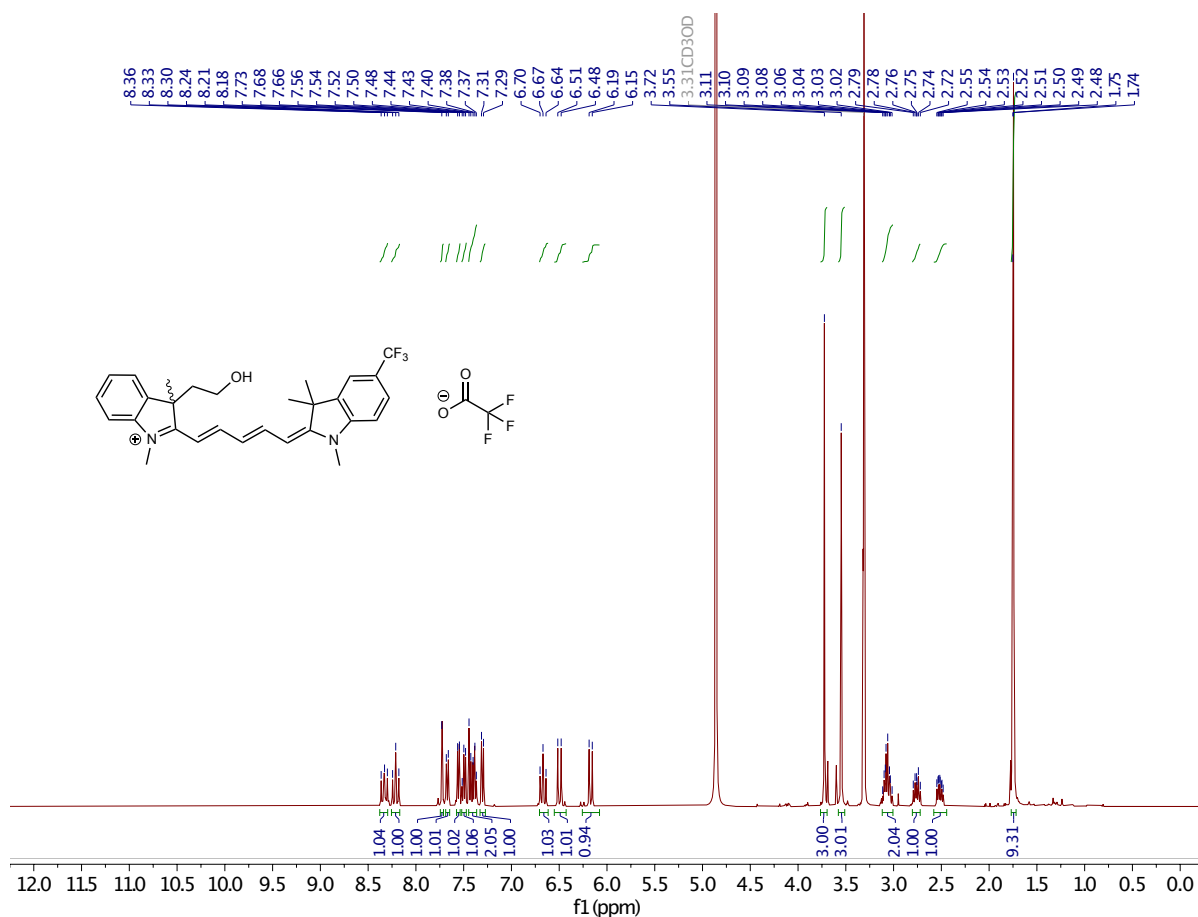

Figure 30. <sup>1</sup>H-NMR of 4b.

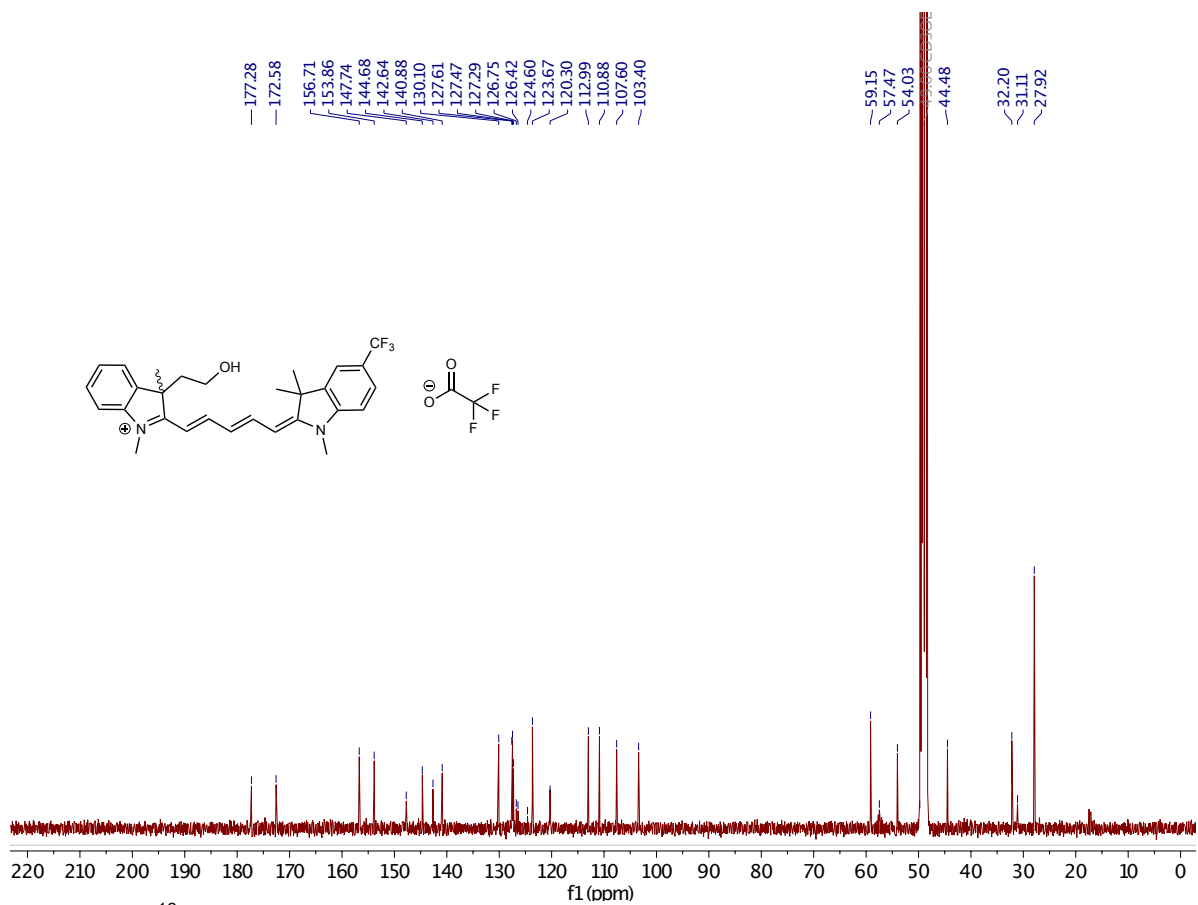

Figure 31. <sup>13</sup>C-NMR of 4b.

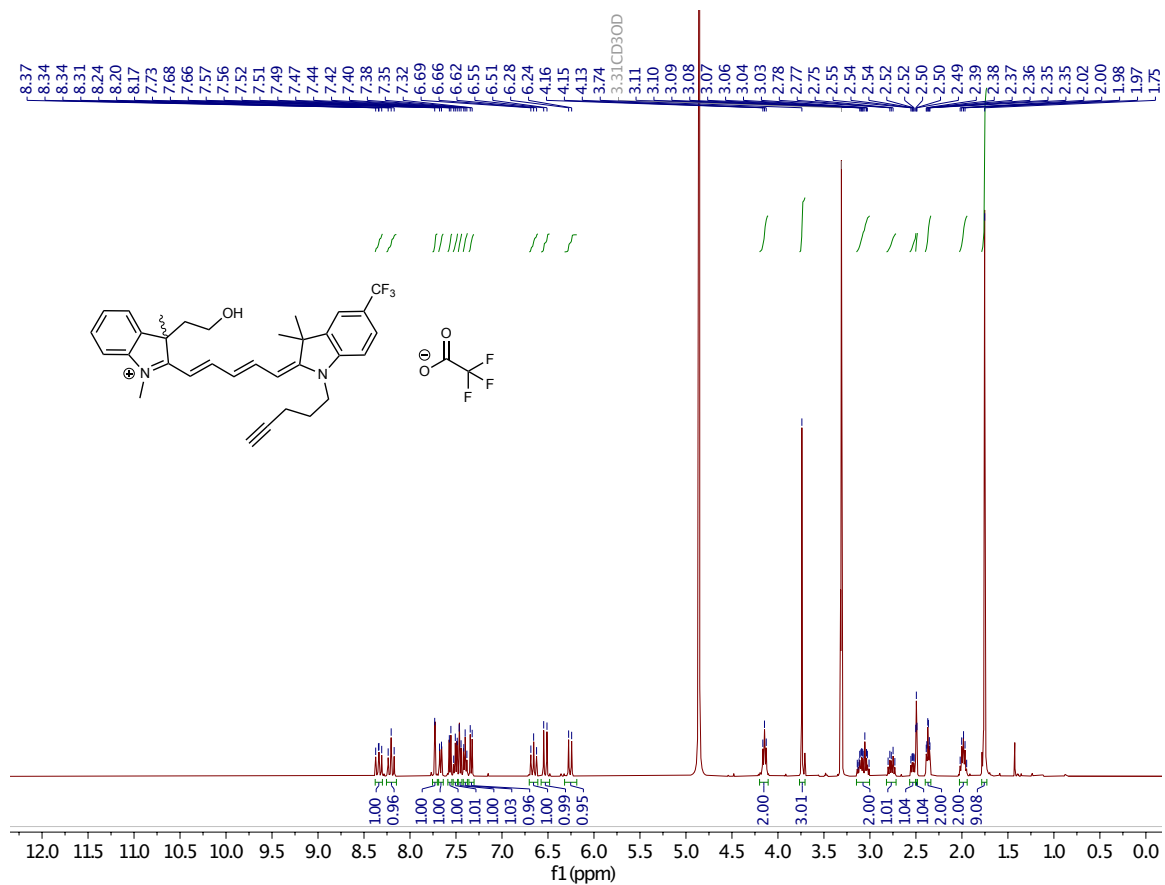

Figure 32. <sup>1</sup>H-NMR of 4c.

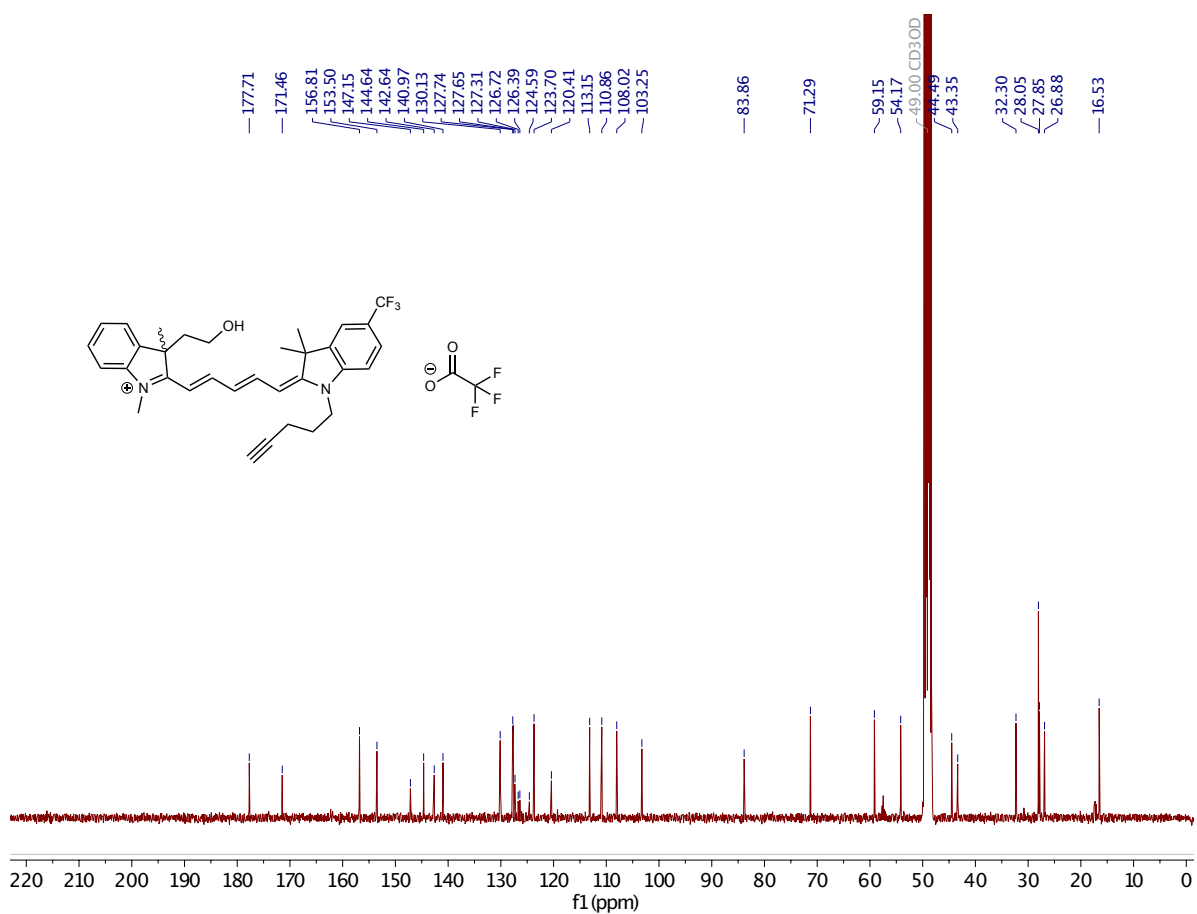

Figure 33. <sup>13</sup>C-NMR of 4c.





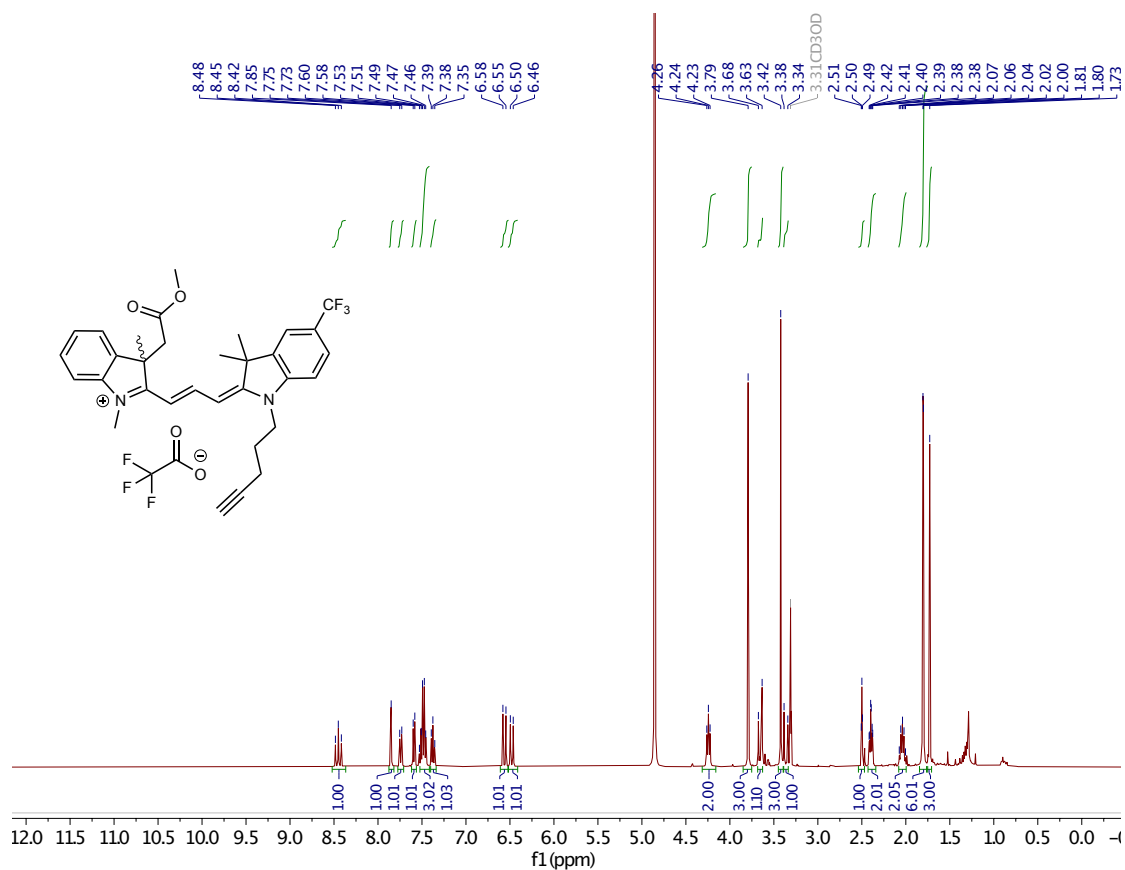

Figure 36.  $^1\text{H-NMR}$  of 21.

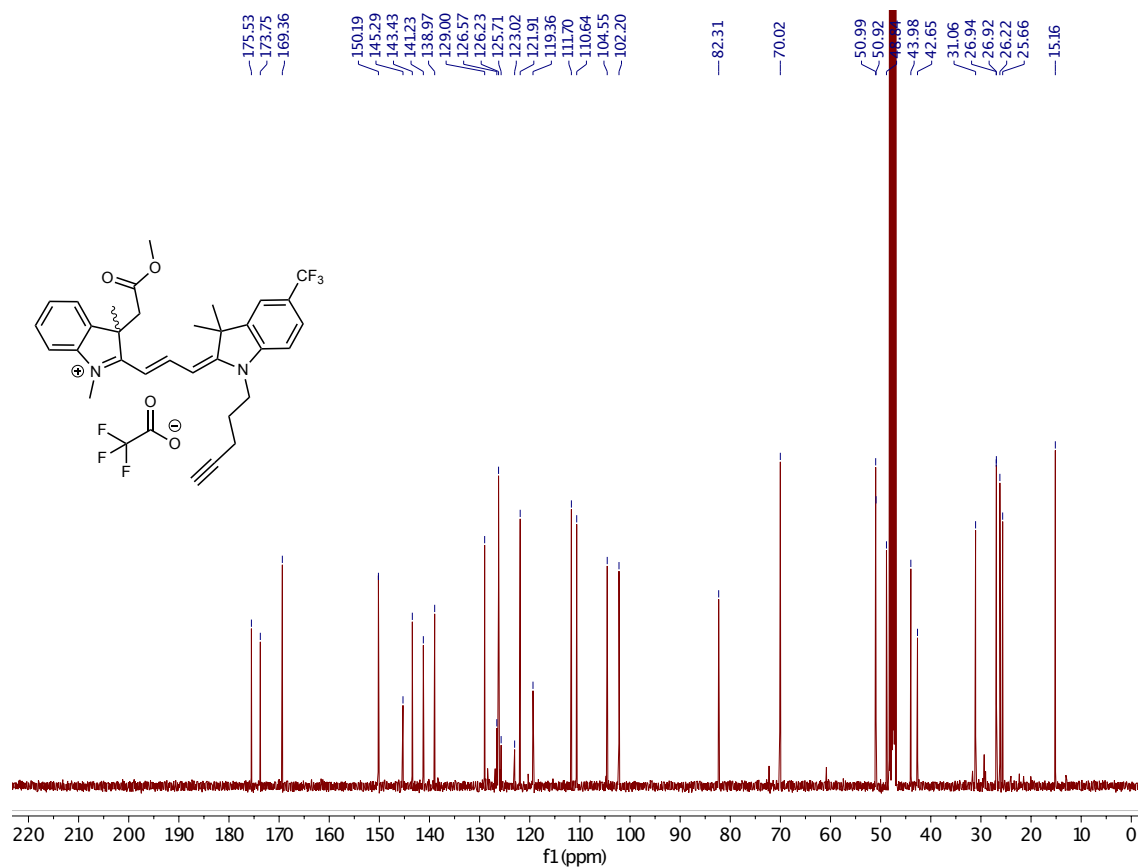

Figure 37.  $^{13}\text{C-NMR}$  of 21.

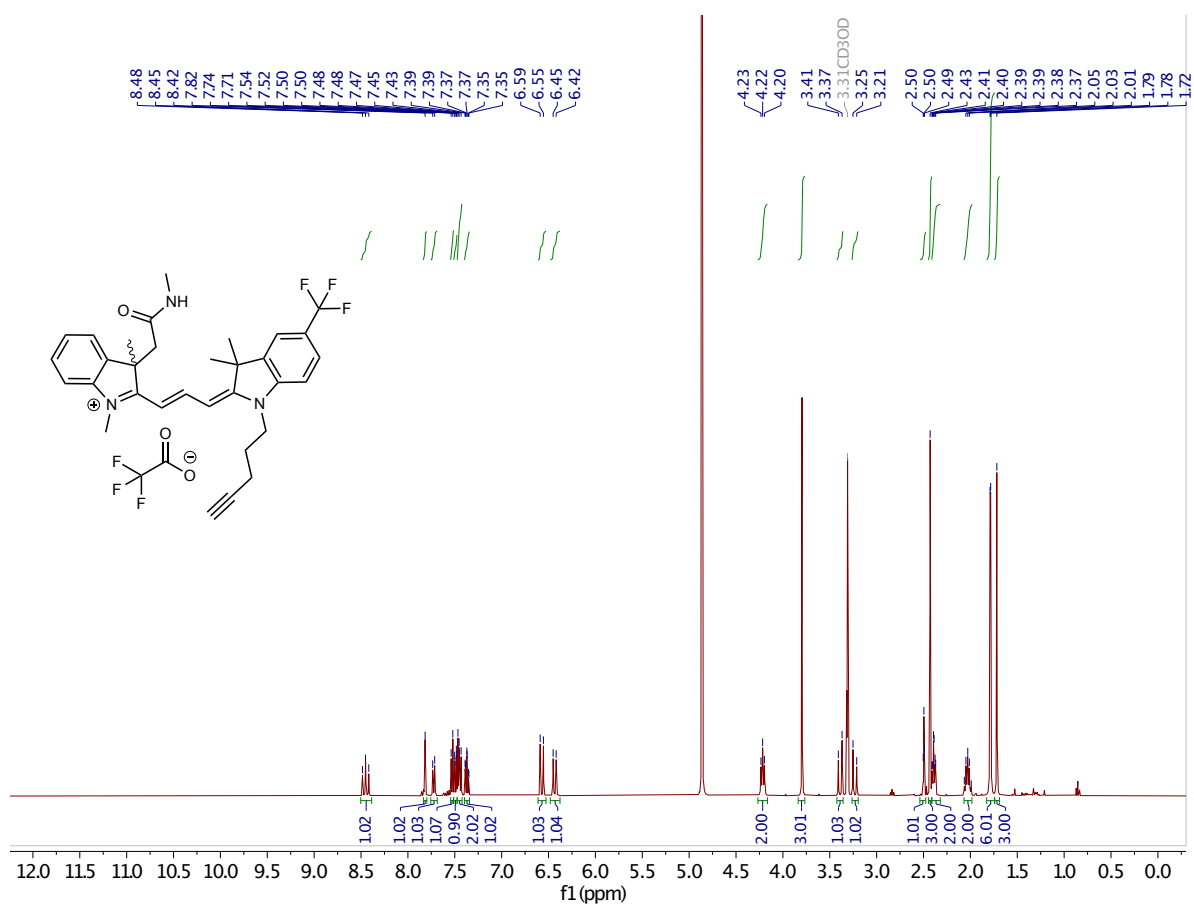

Figure 38. <sup>1</sup>H-NMR of 22.

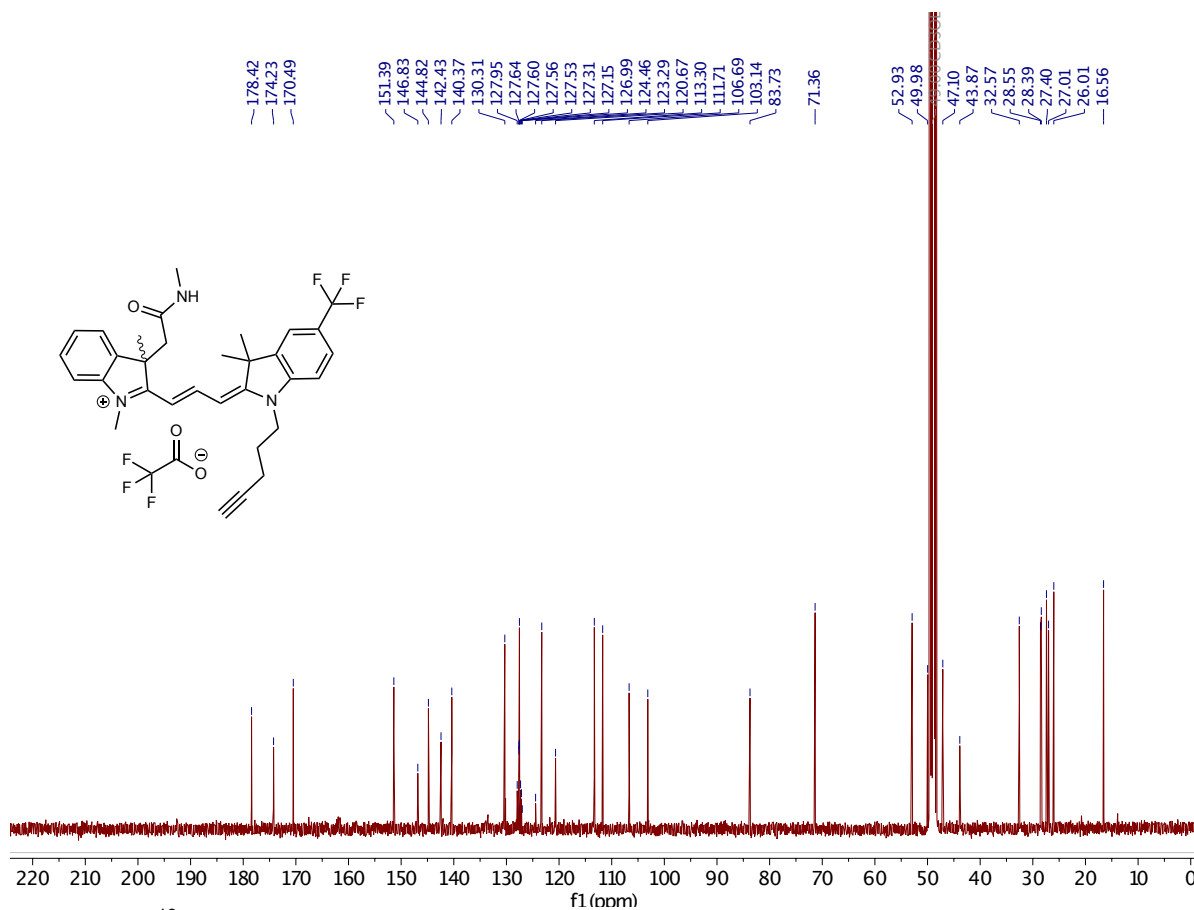

Figure 39. <sup>13</sup>C-NMR of 22.

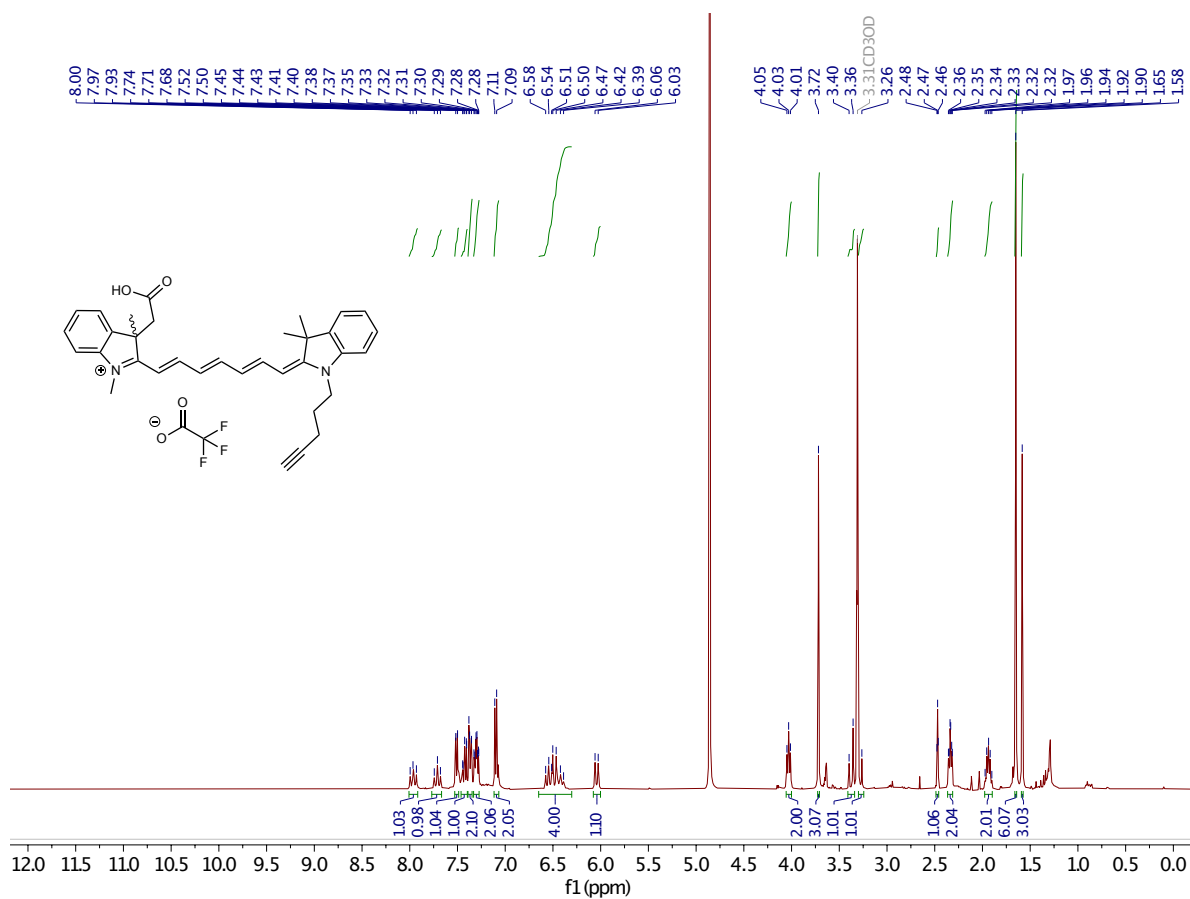

Figure 40.  $^1\text{H-NMR}$  of **23**.

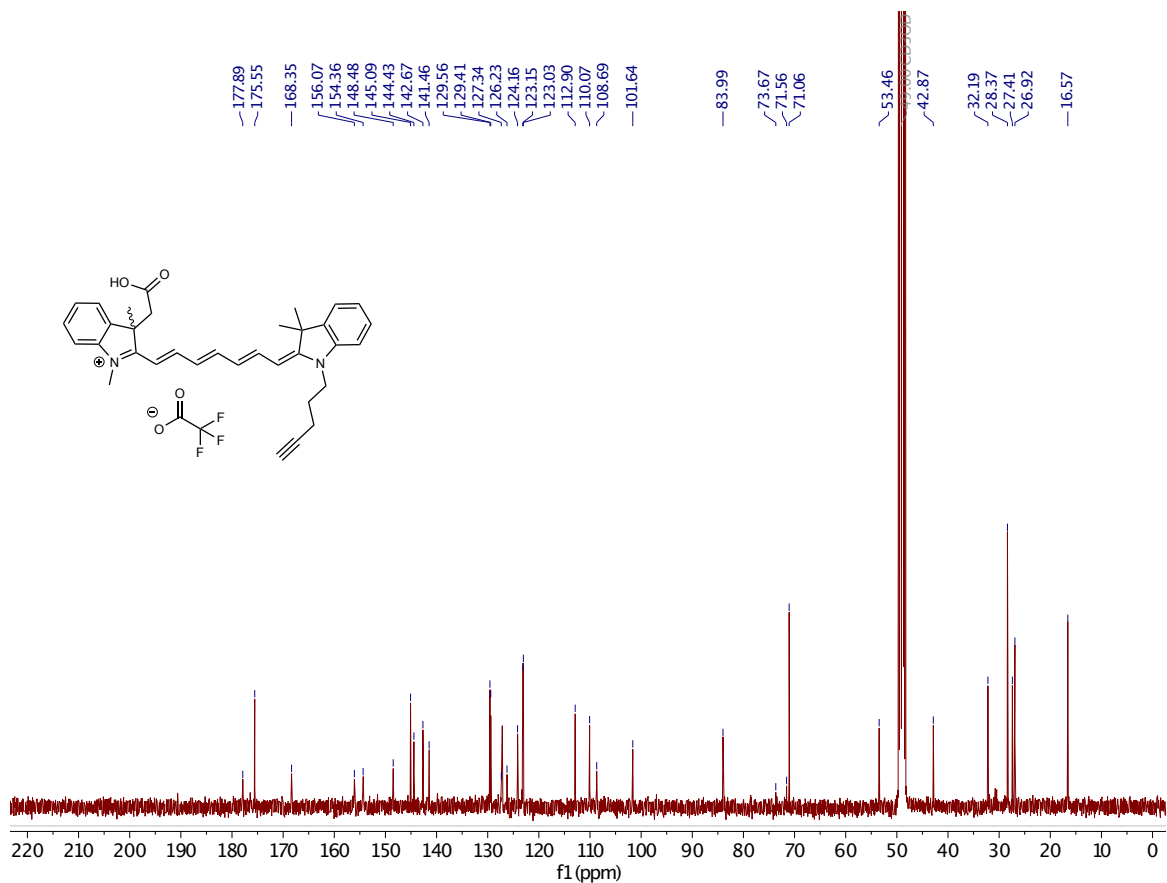

Figure 41.  $^{13}\text{C-NMR}$  of **23**.

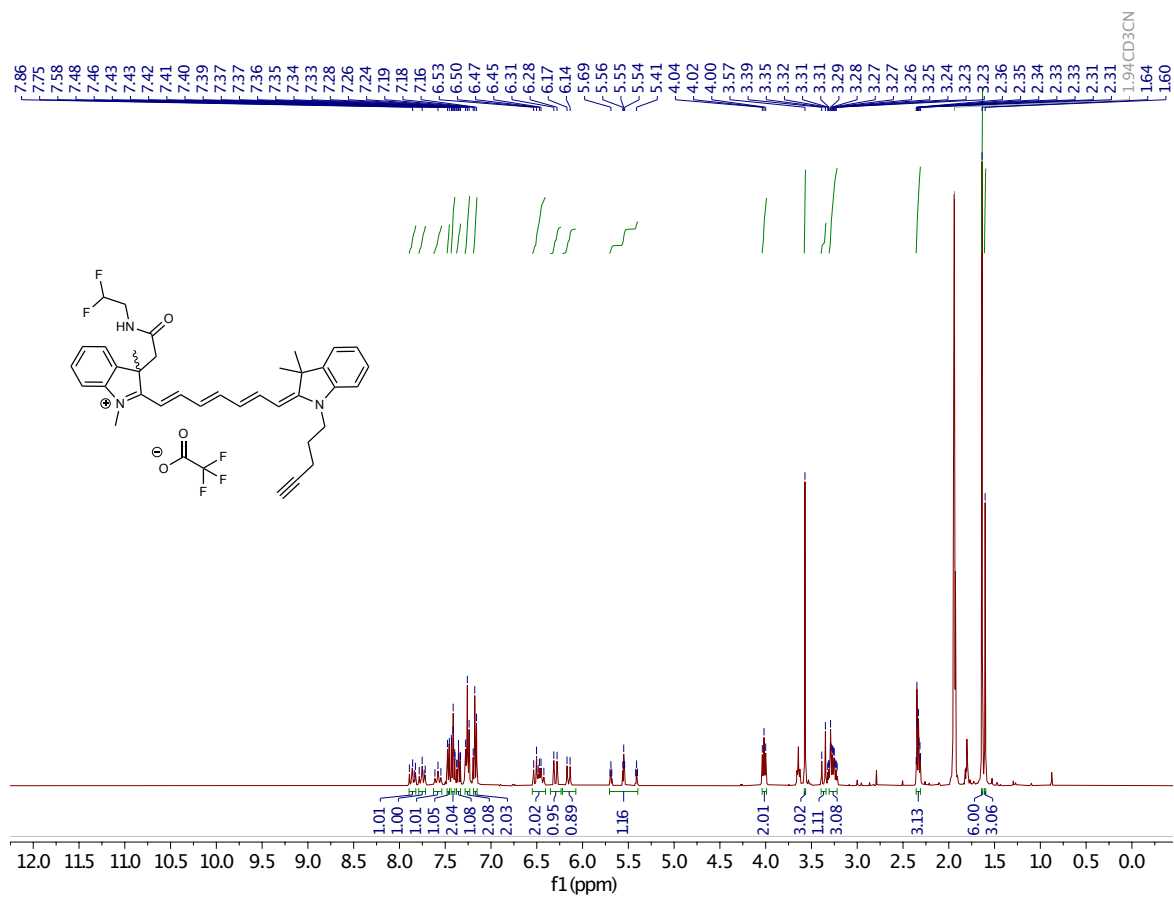

Figure 42. <sup>1</sup>H-NMR of 24.

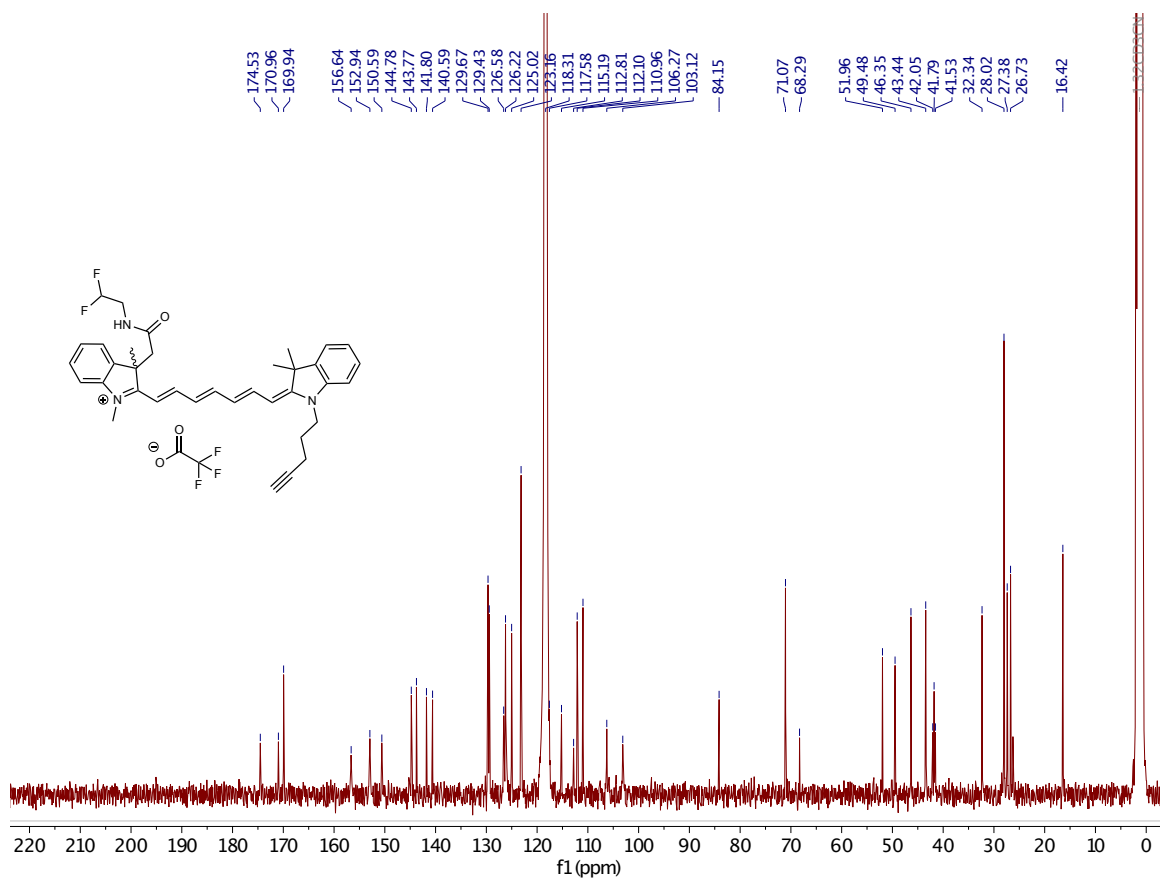

Figure 43. <sup>13</sup>C-NMR of 24.

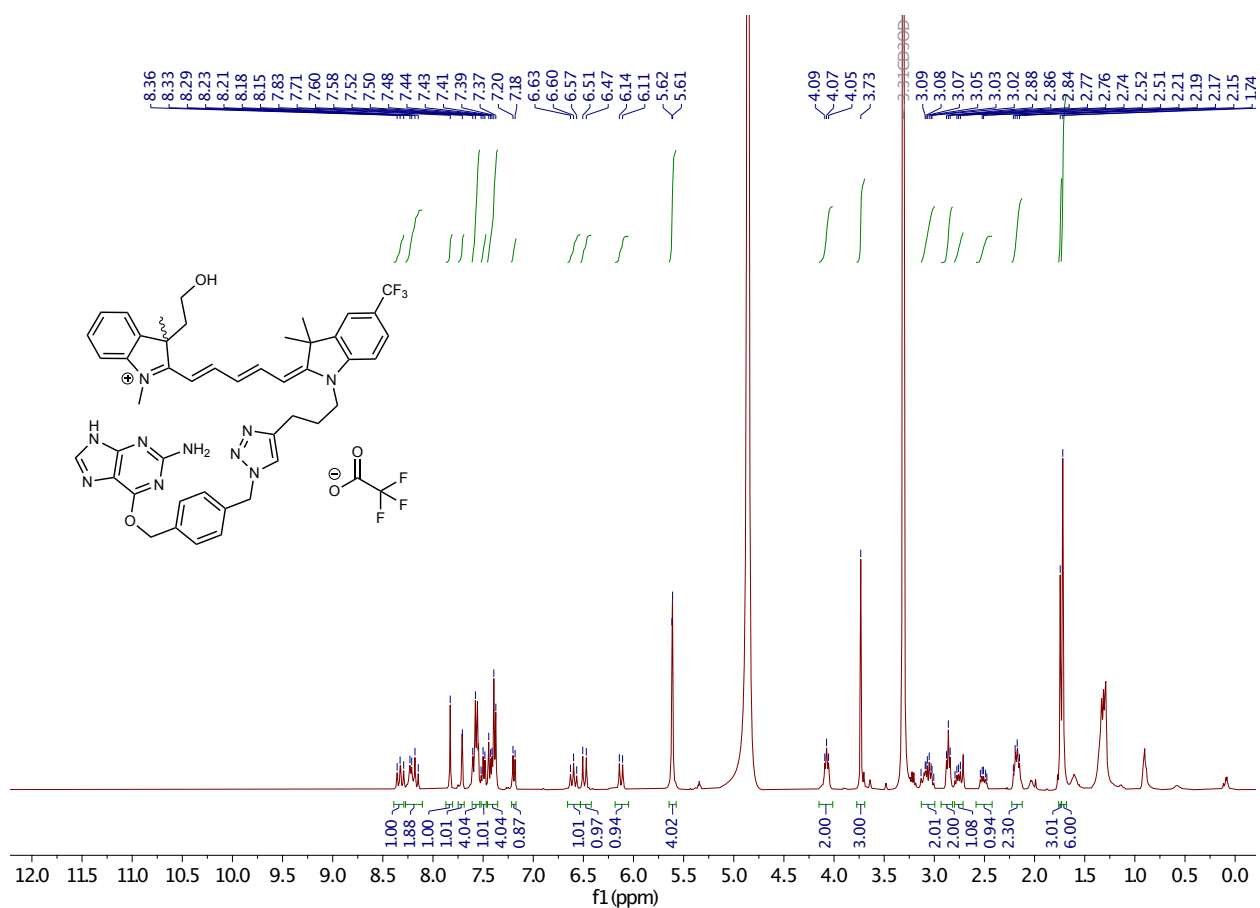

Figure 44.  $^1\text{H-NMR}$  of 11.

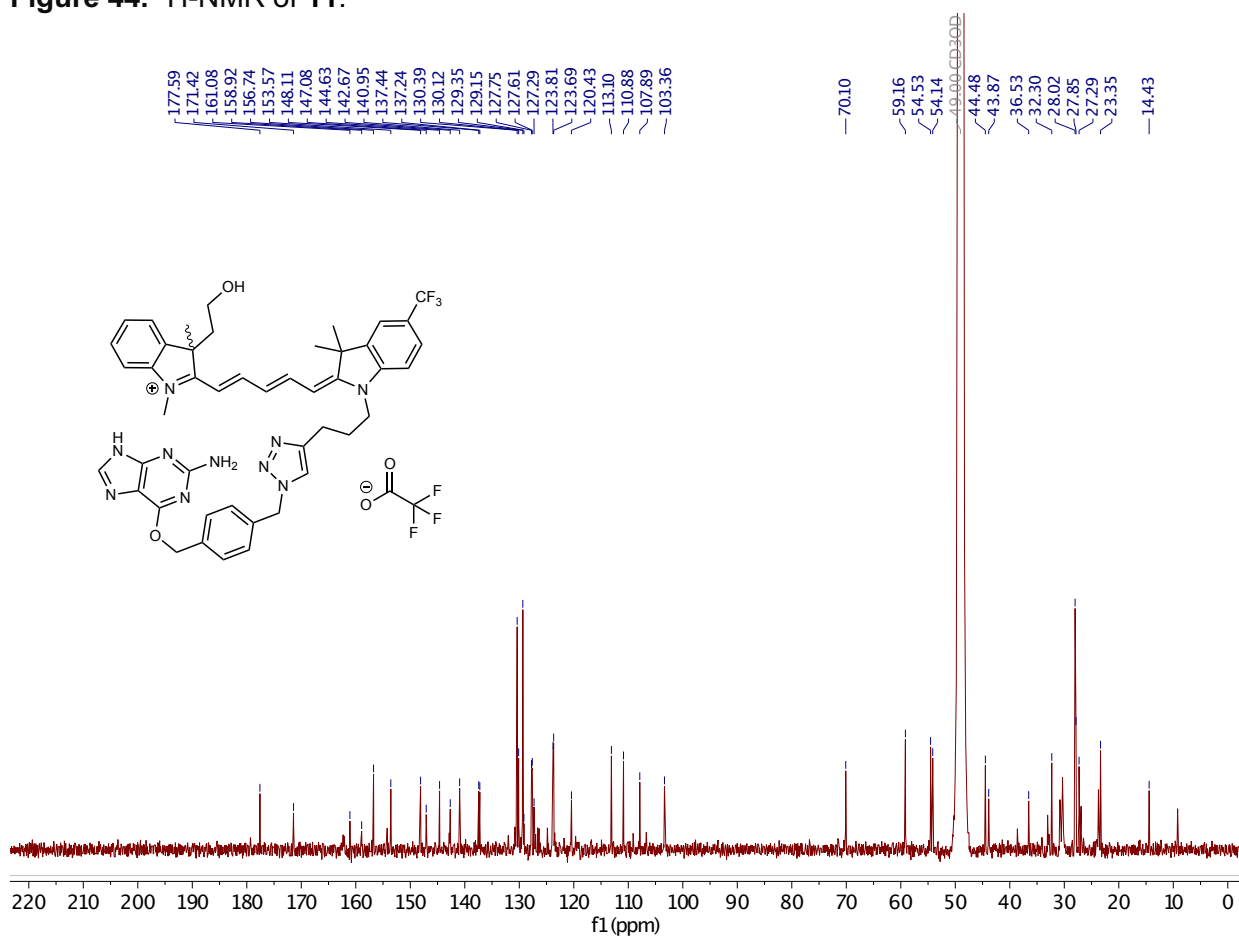

Figure 45.  $^{13}\text{C-NMR}$  of 11.

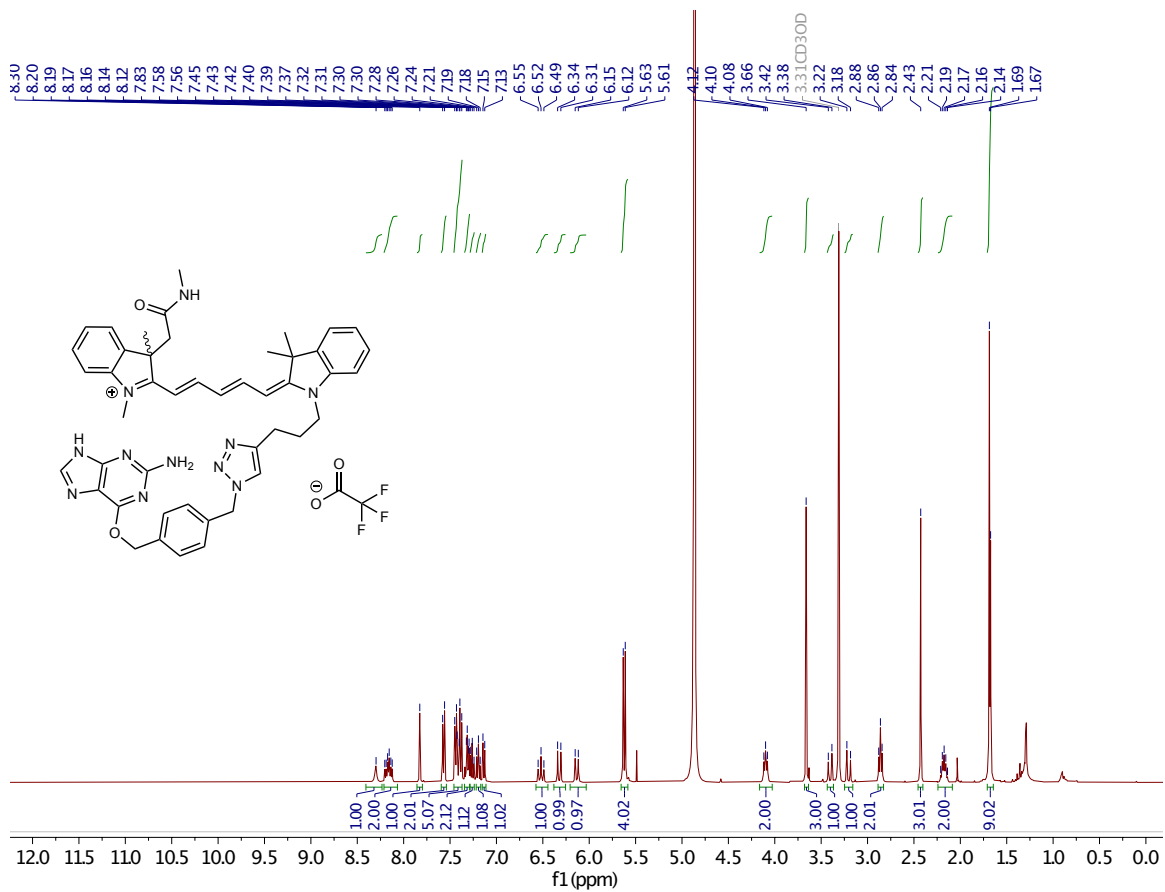

Figure 46.  $^1\text{H-NMR}$  of 15.

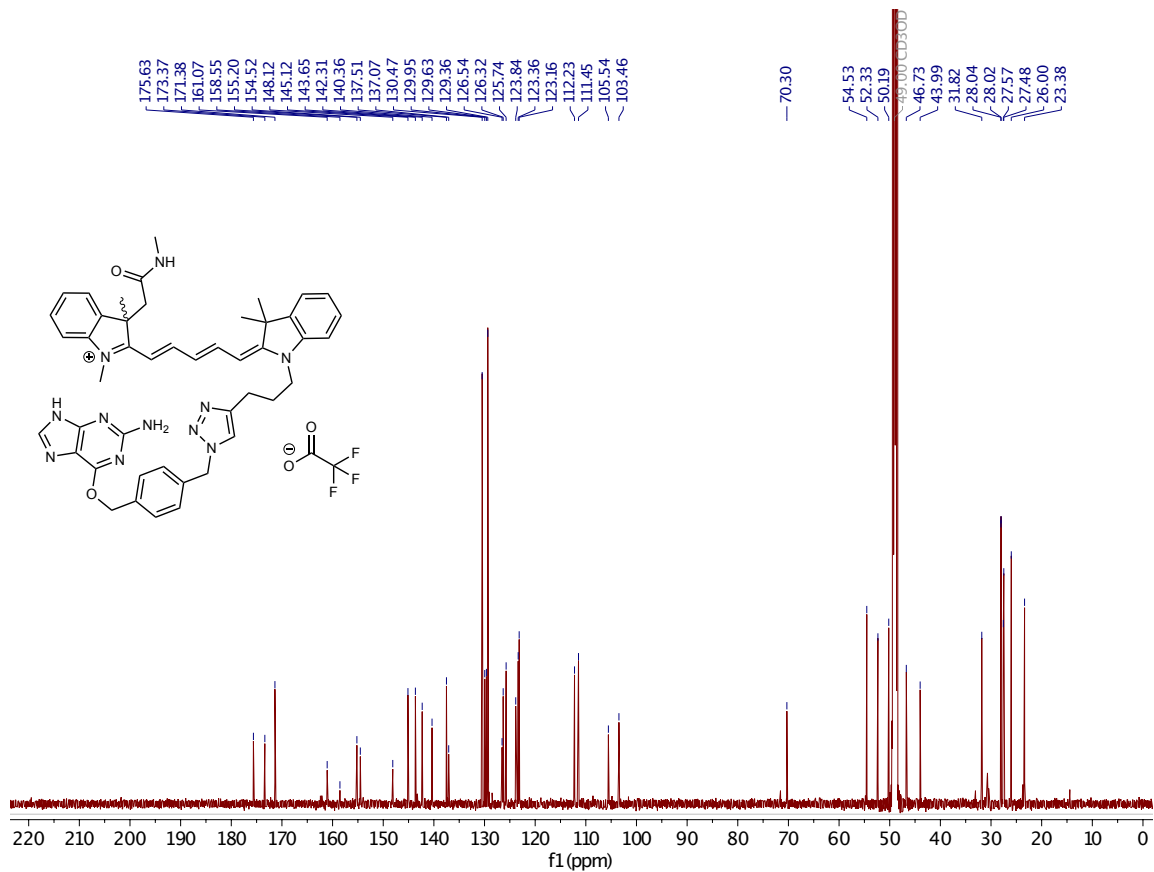

Figure 47.  $^{13}\text{C-NMR}$  of 15.

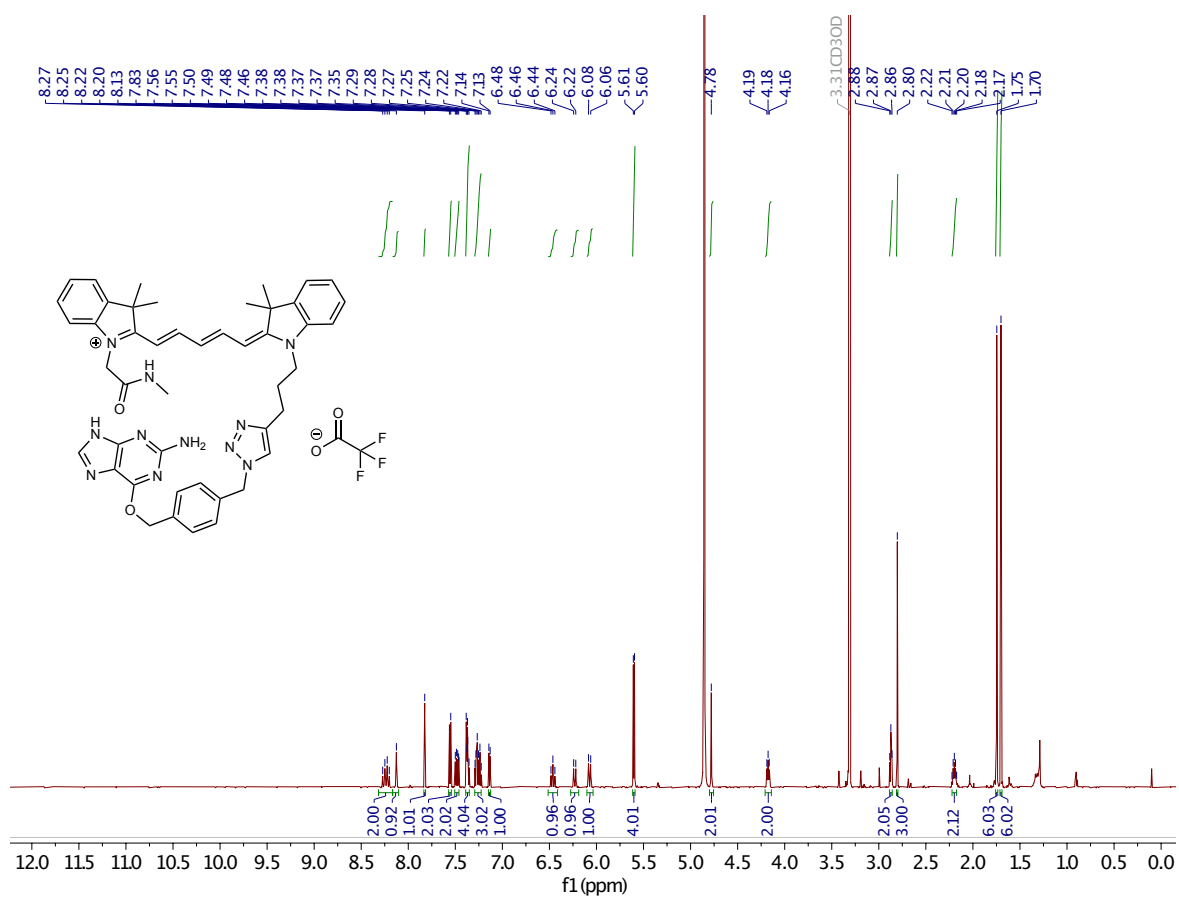

Figure 48. <sup>1</sup>H-NMR of 16.

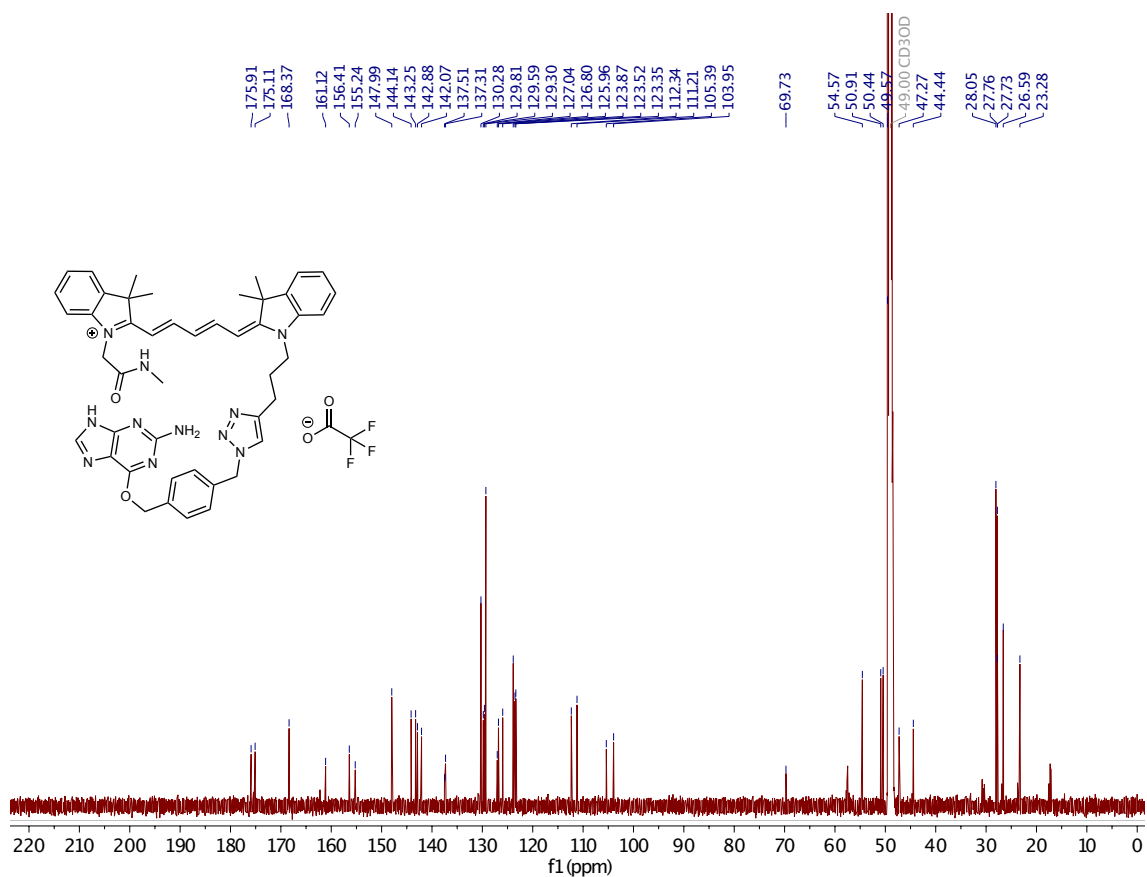

Figure 49. <sup>13</sup>C-NMR of 16.



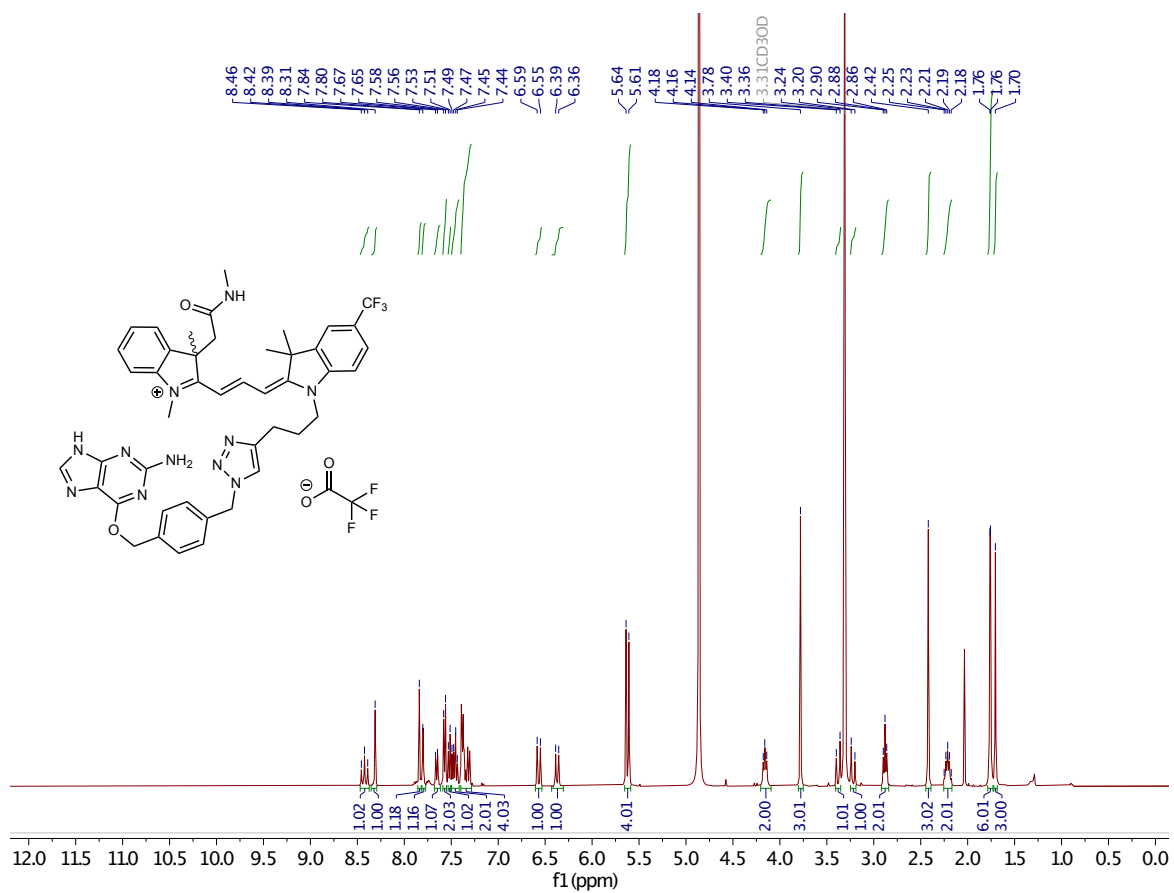

Figure 50.  $^1\text{H-NMR}$  of 19.

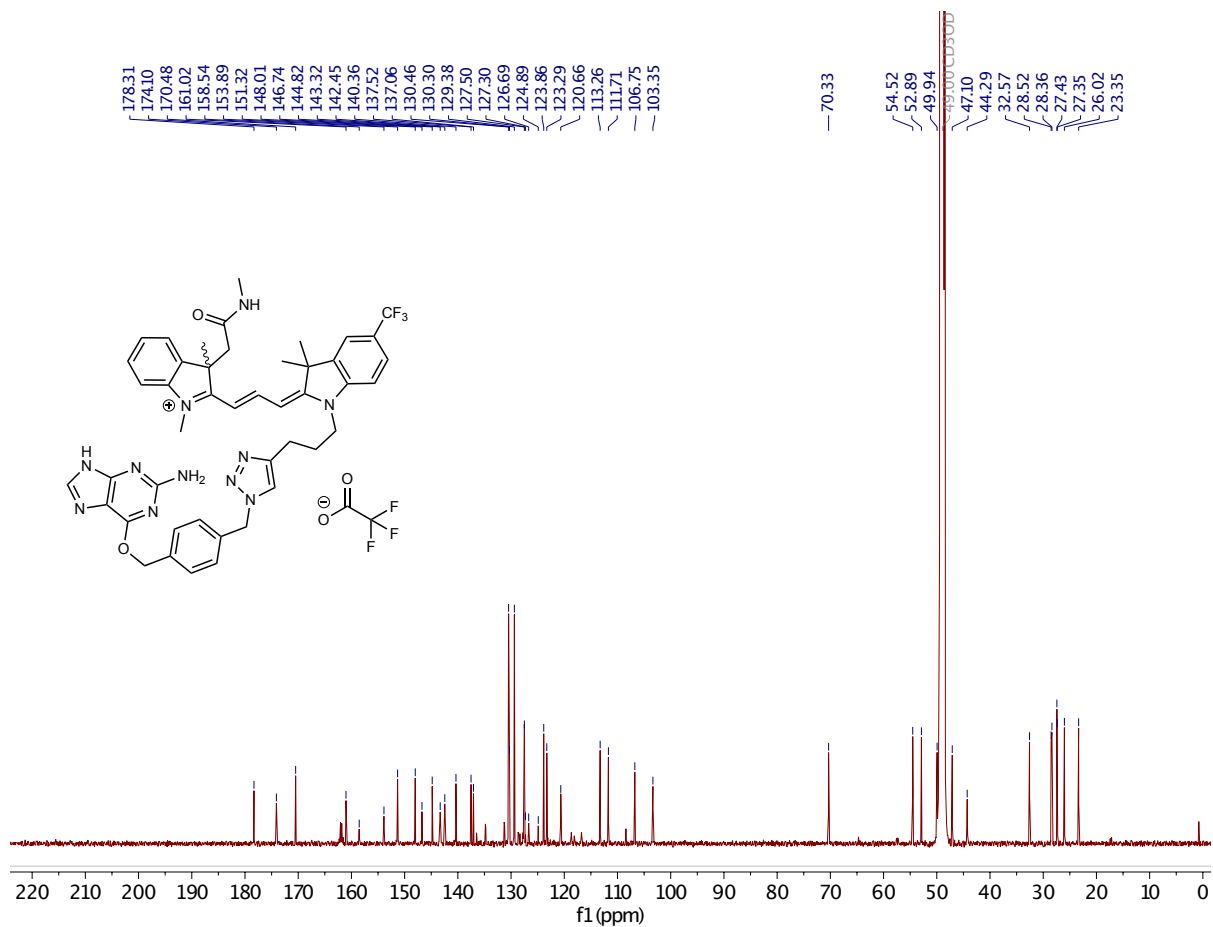

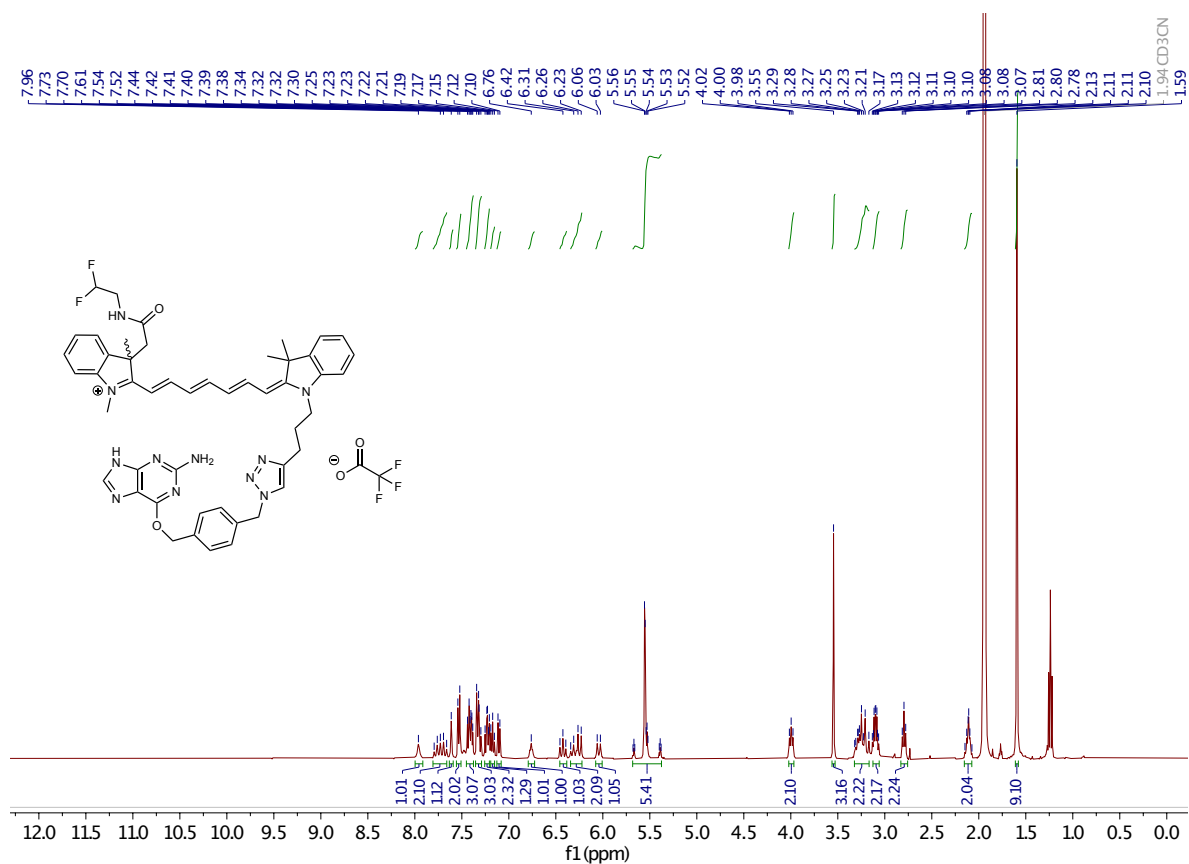

Figure 52.  $^1\text{H-NMR}$  of 20.

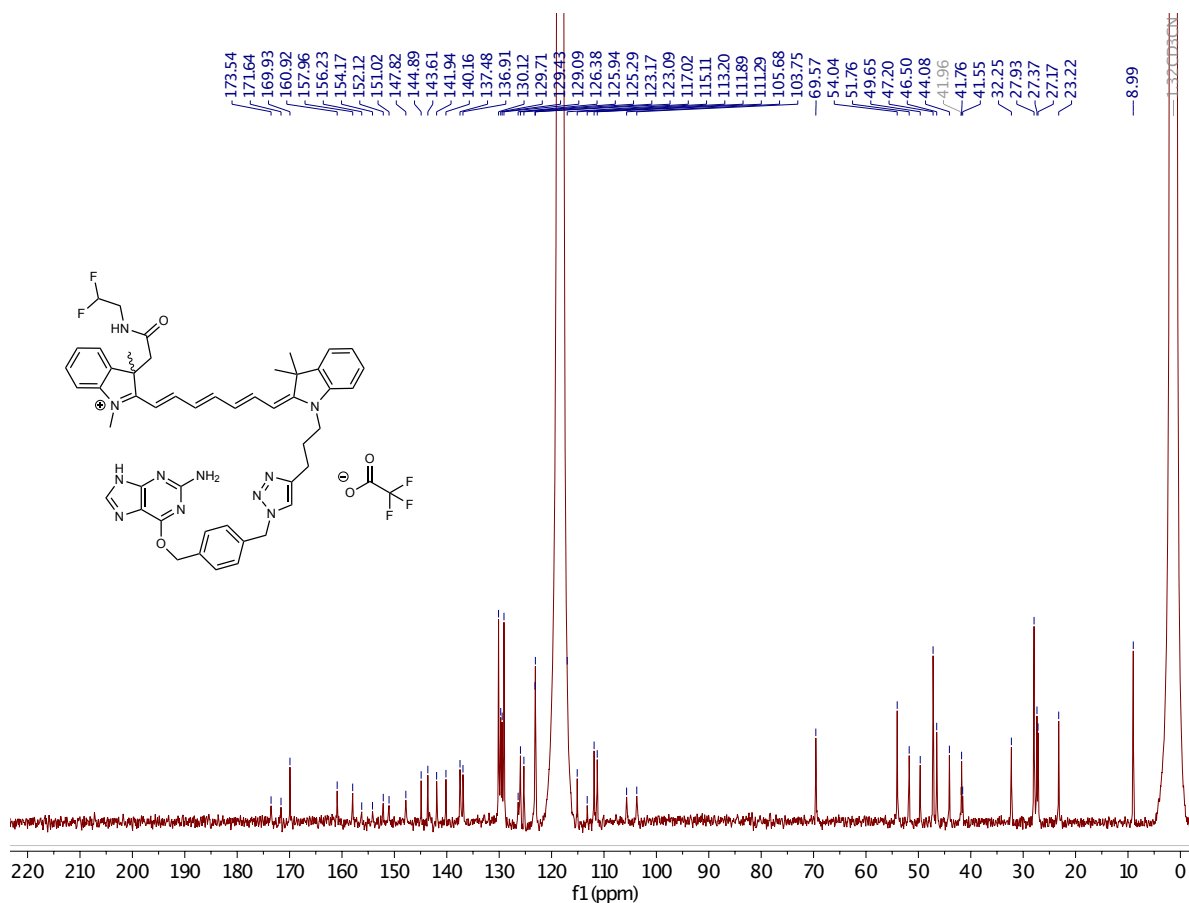

Figure 53  $^{13}\text{C-NMR}$  of 20.

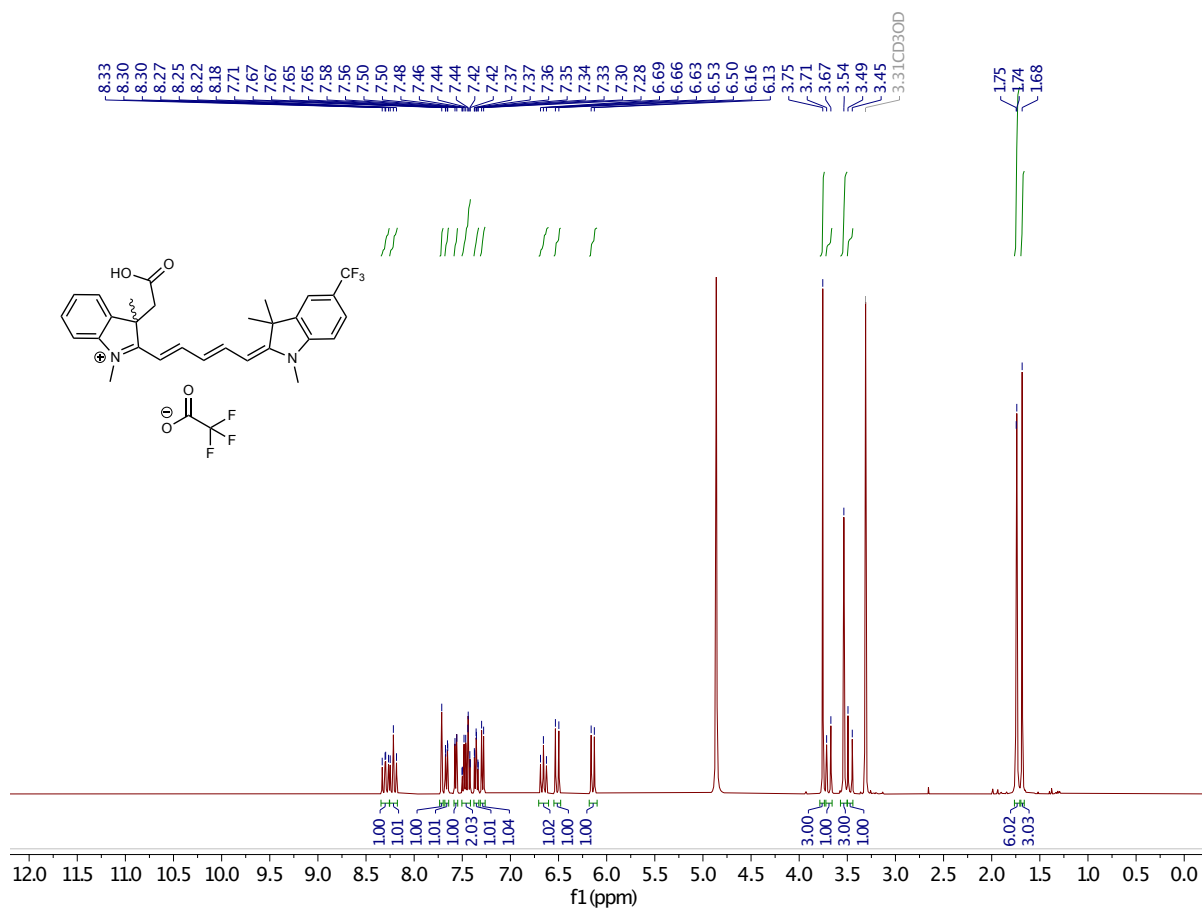

Figure 54.  $^1\text{H-NMR}$  of S1.

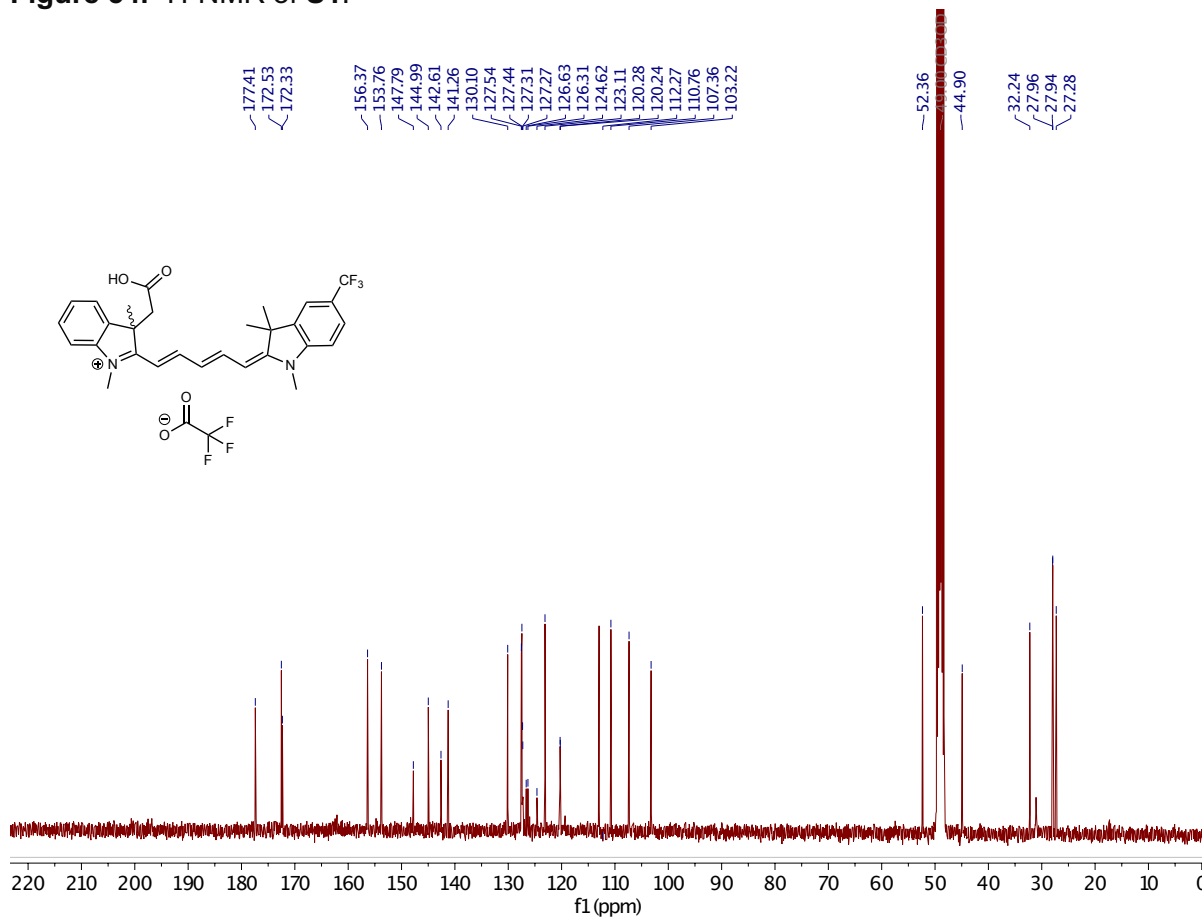

Figure 55.  $^{13}\text{C-NMR}$  of S1.

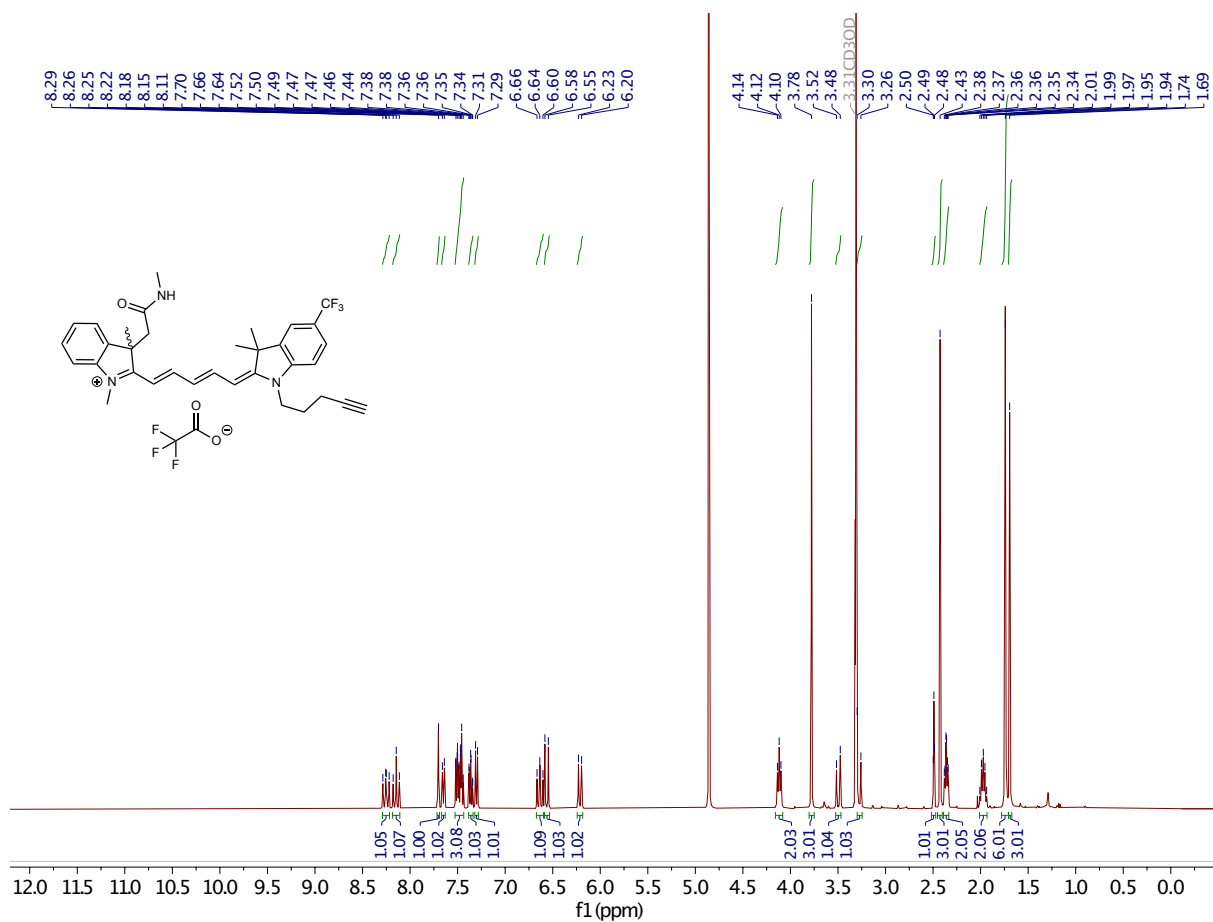

Figure 56. <sup>1</sup>H-NMR of S2.

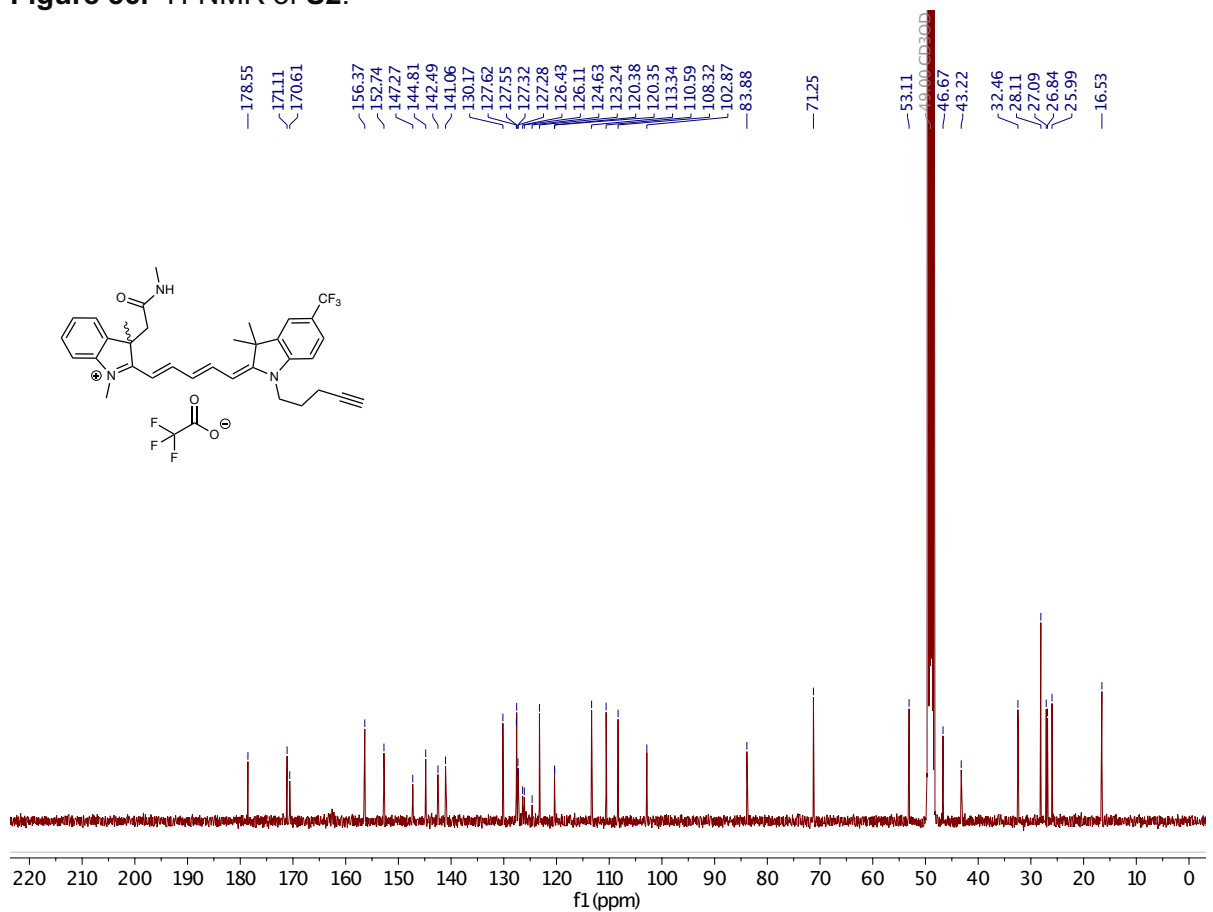

Figure 57 <sup>13</sup>C-NMR of S2

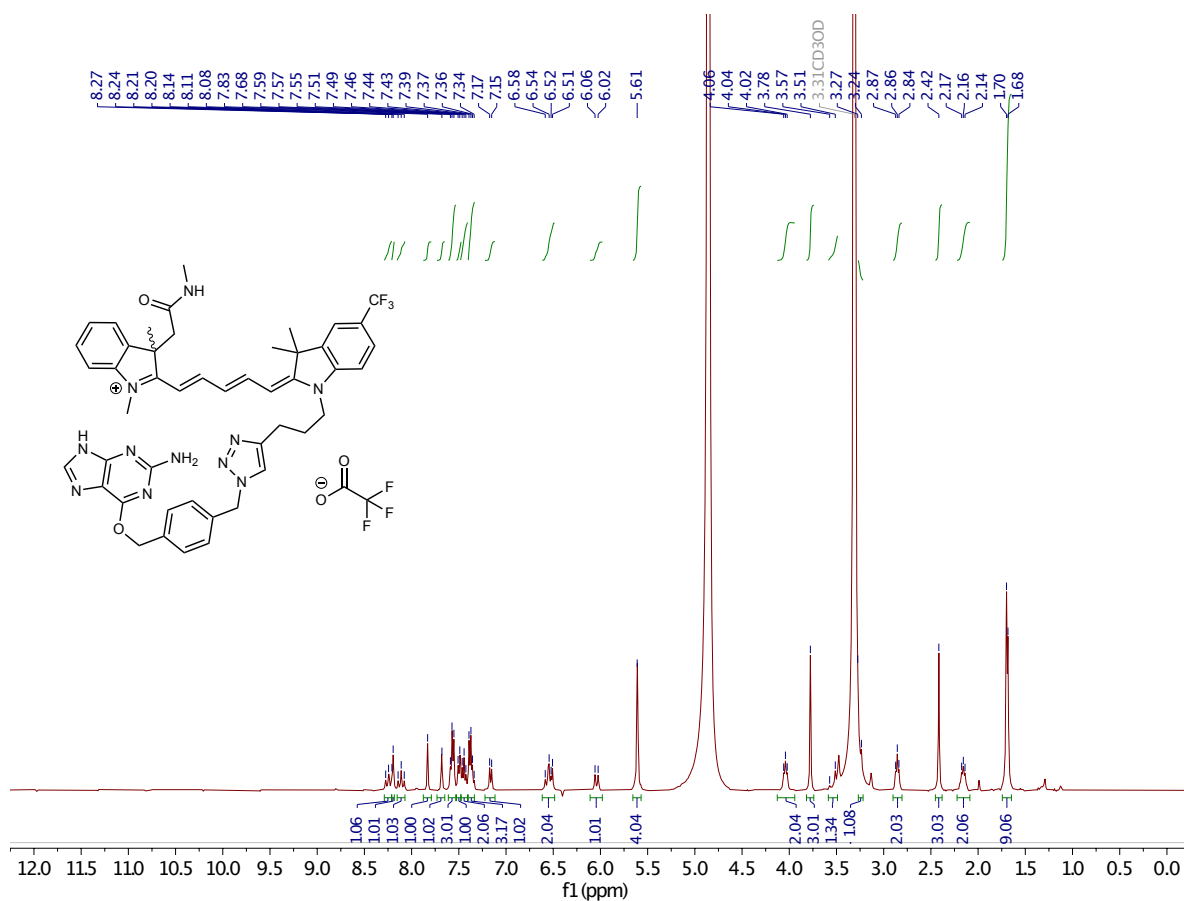

**Figure 58.**  $^1\text{H-NMR}$  of **S3**.

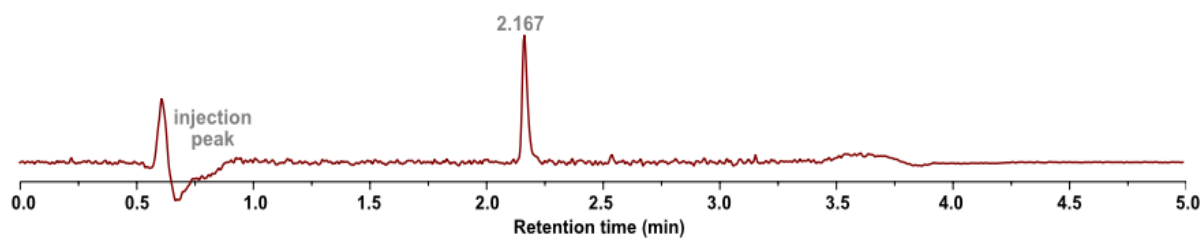

**Figure 59.** Integrated absorbance signal (190-300 nm) of analytical LC-MS run (10  $\rightarrow$  95%  $\text{CH}_3\text{CN}$  in  $\text{ddH}_2\text{O}$  + 0.02% TFA + 0.04% FA over 3 min, then additional 2 min at 95%) of **S3**.

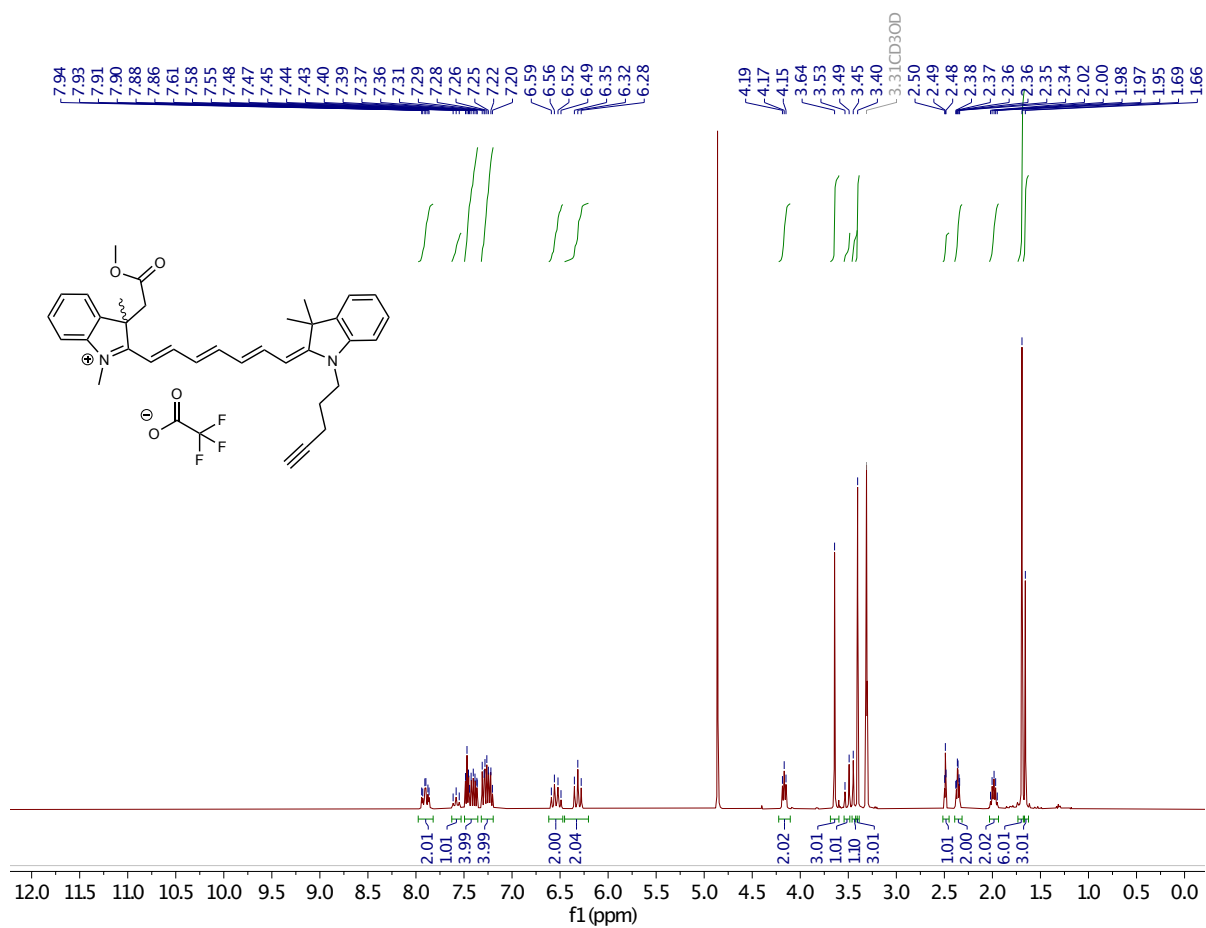

Figure 60.  $^1\text{H-NMR}$  of S4.

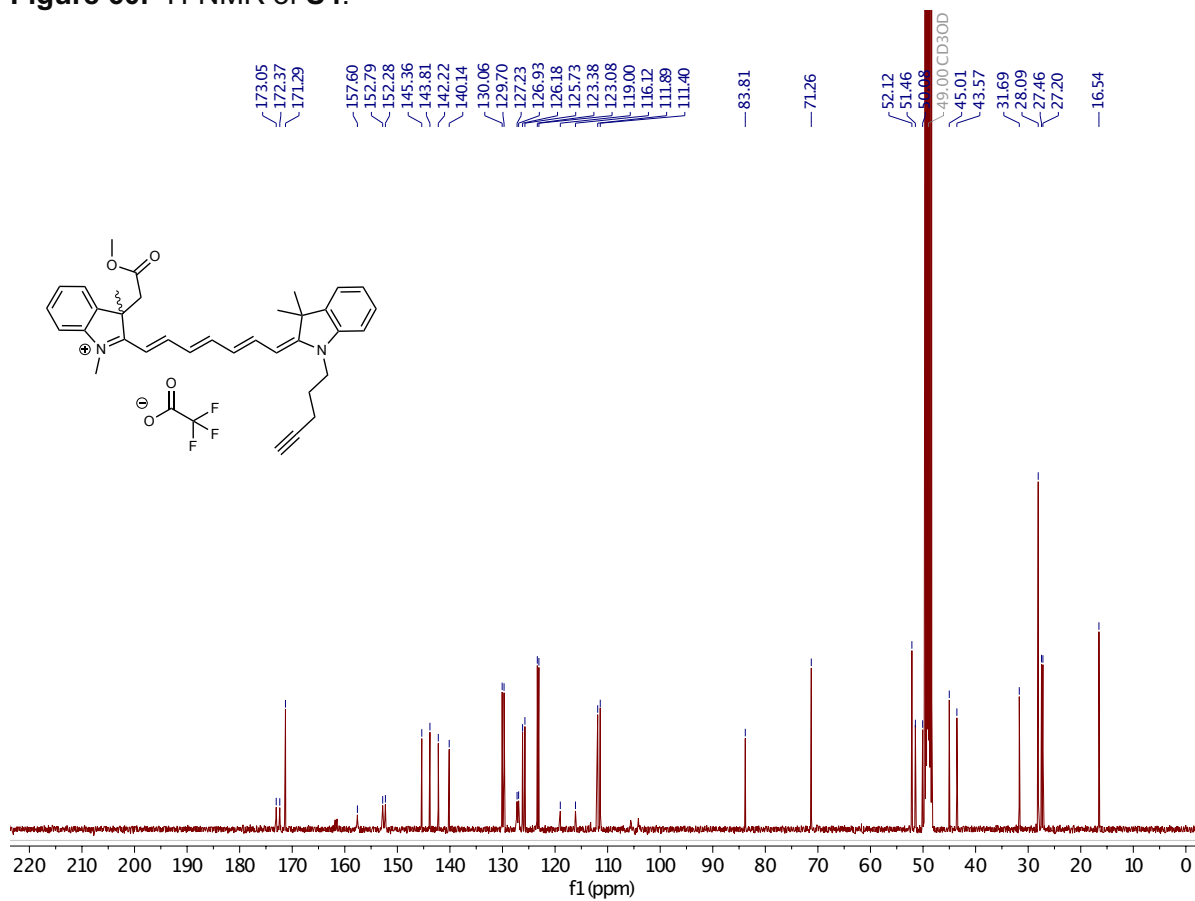

Figure 61.  $^{13}\text{C-NMR}$  of S4



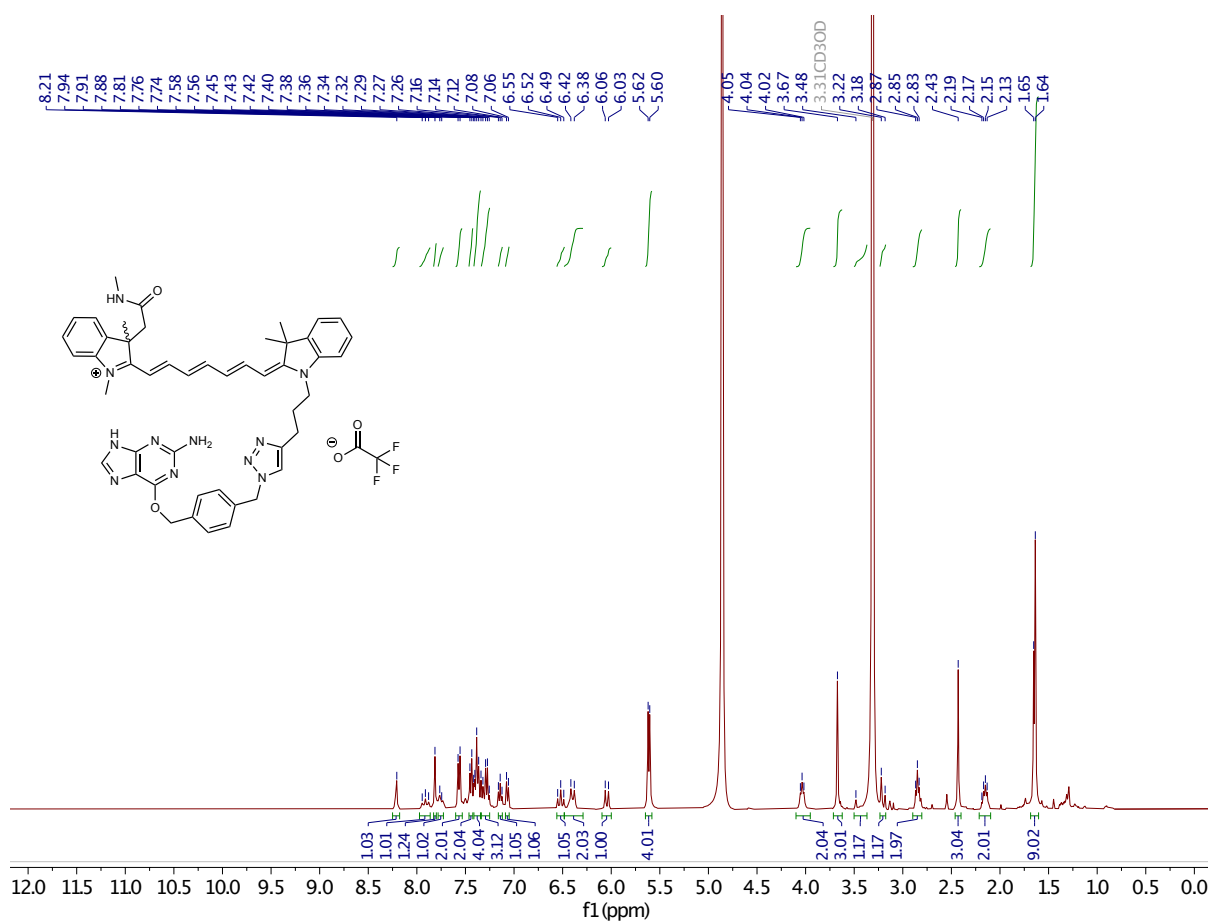

**Figure 64.**  $^1\text{H-NMR}$  of **S6**.

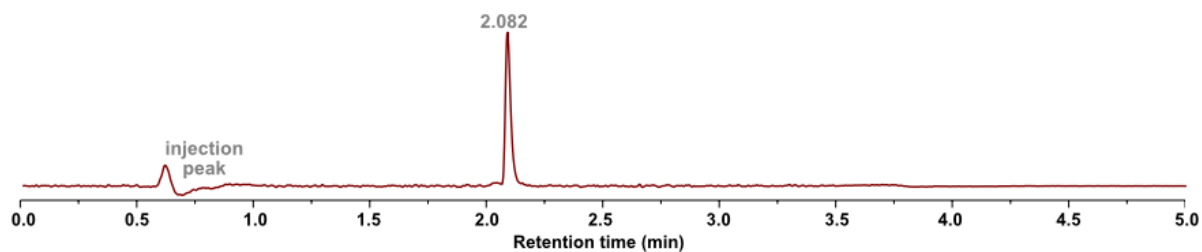

**Figure 65.** Integrated absorbance signal (190-300 nm) of analytical LC-MS run (10 → 95%  $\text{CH}_3\text{CN}$  in  $\text{ddH}_2\text{O}$  + 0.02% TFA + 0.04% FA over 3 min, then additional 2 min at 95%) of **S6**.



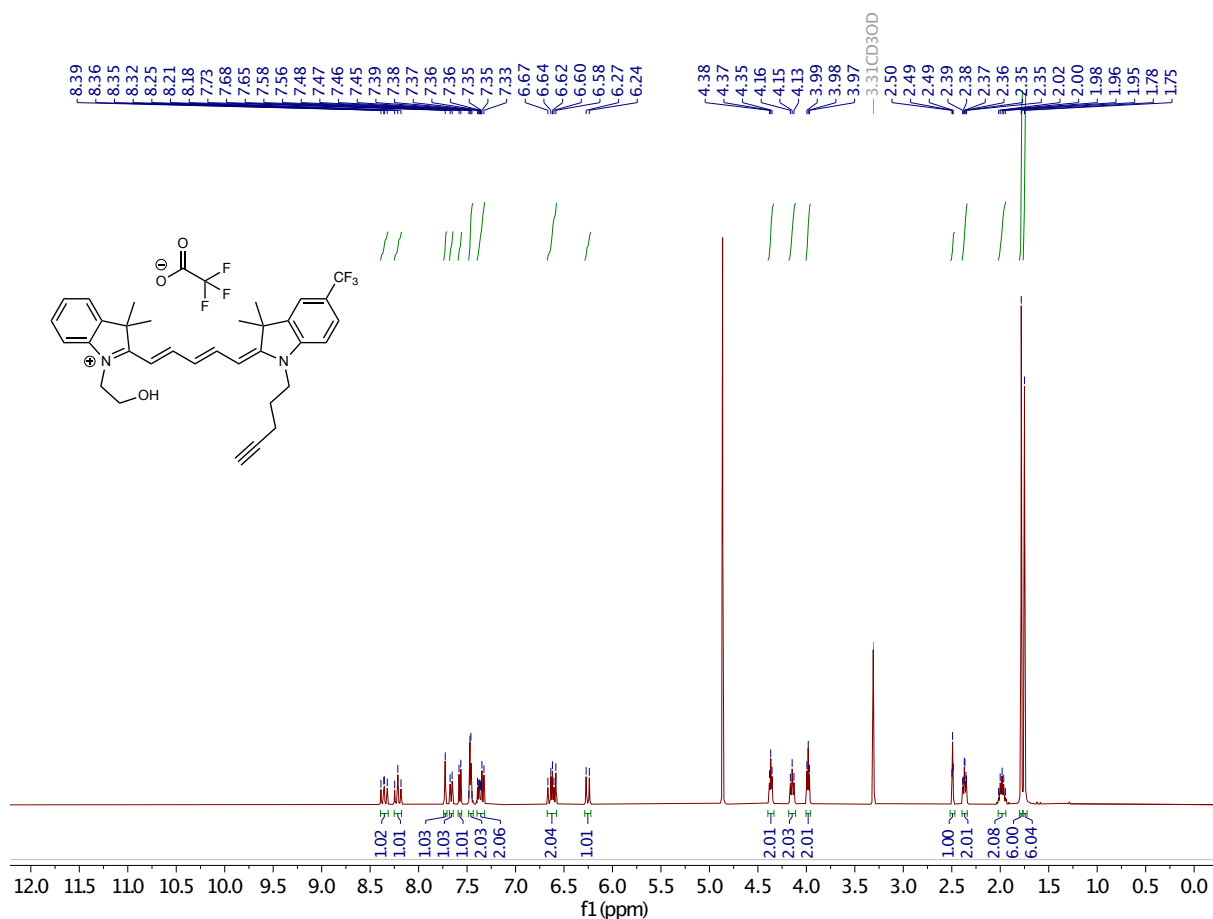

Figure 66. <sup>1</sup>H-NMR of S7.

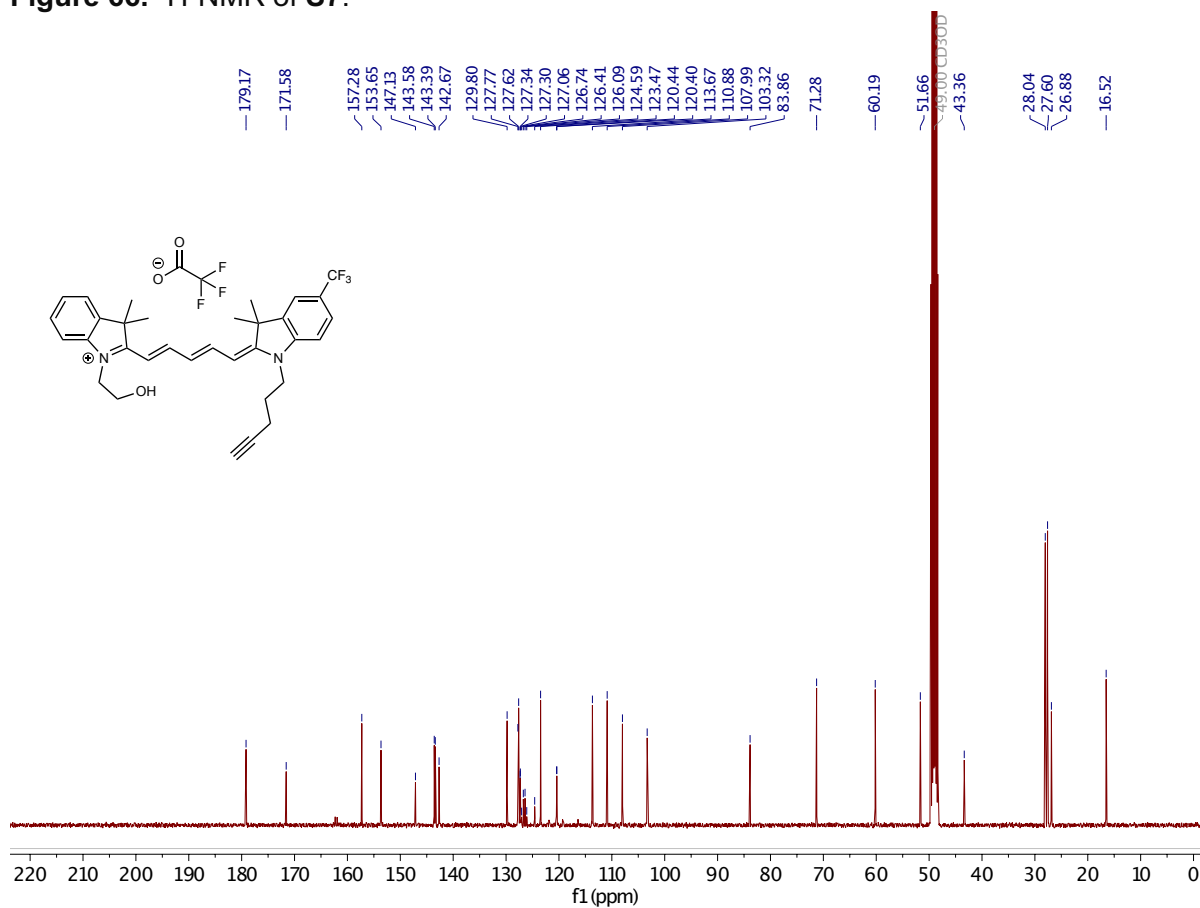

Figure 67. <sup>13</sup>C-NMR of S7.



# Plasmid maps

## H2B-SNAPf-mTurquoise2

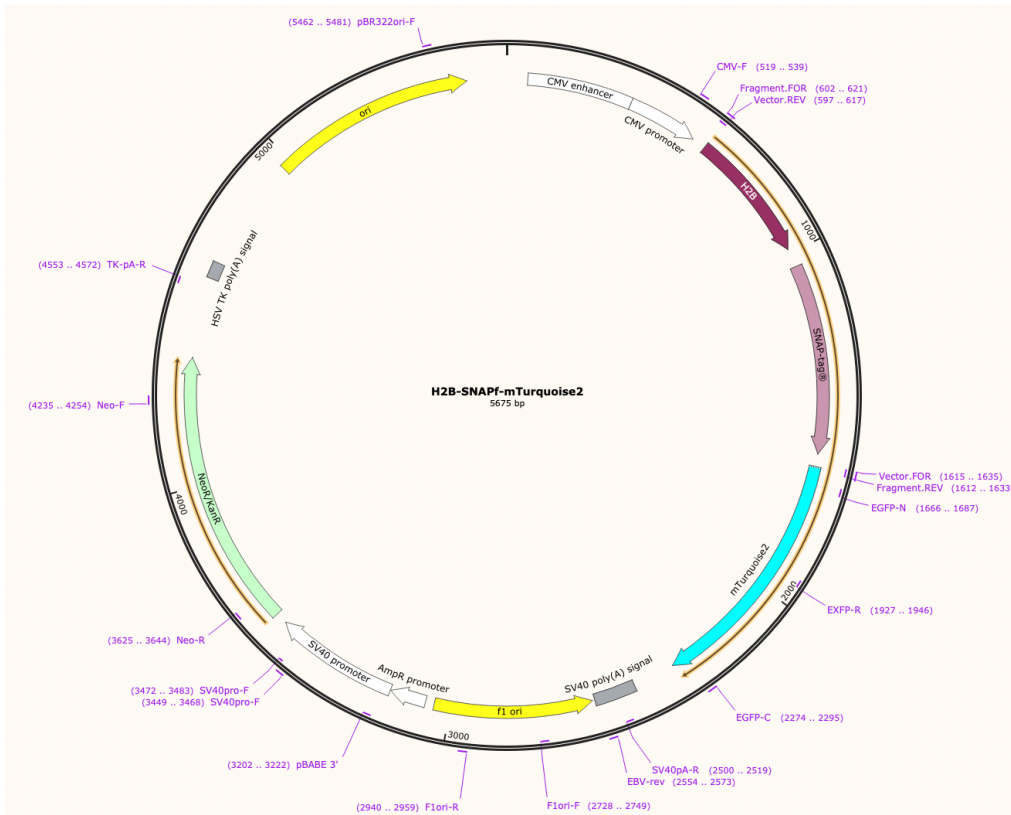

## SNAPf-mTurquoise2-KDEL

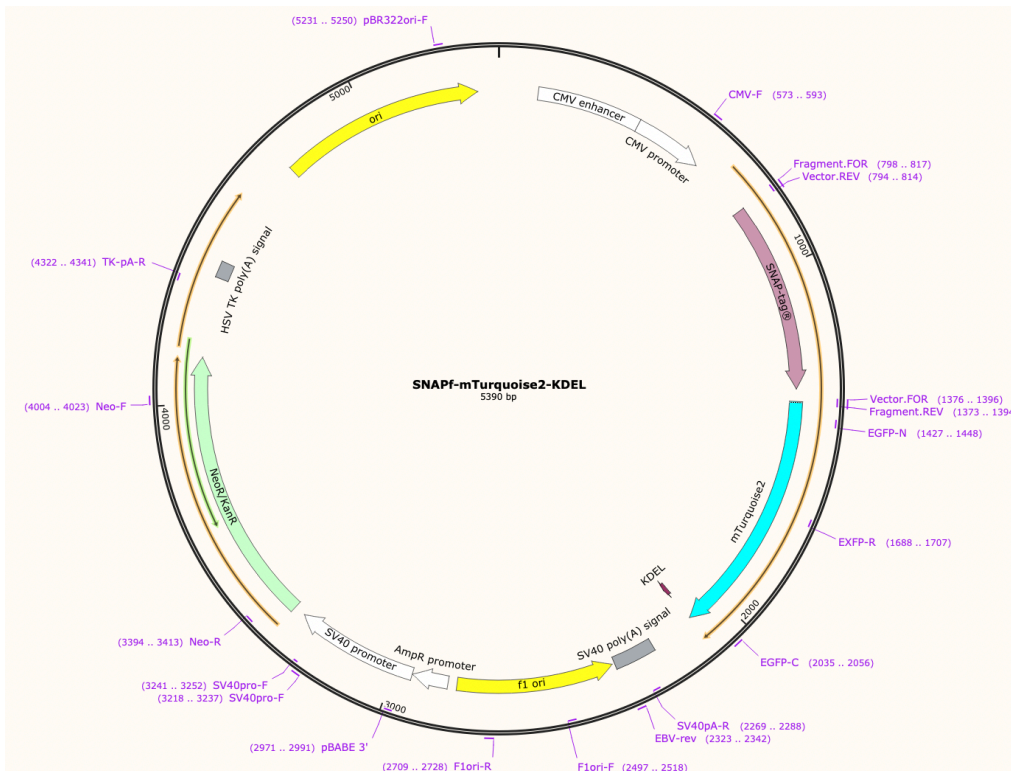

## SNAPf-mTurquoise2

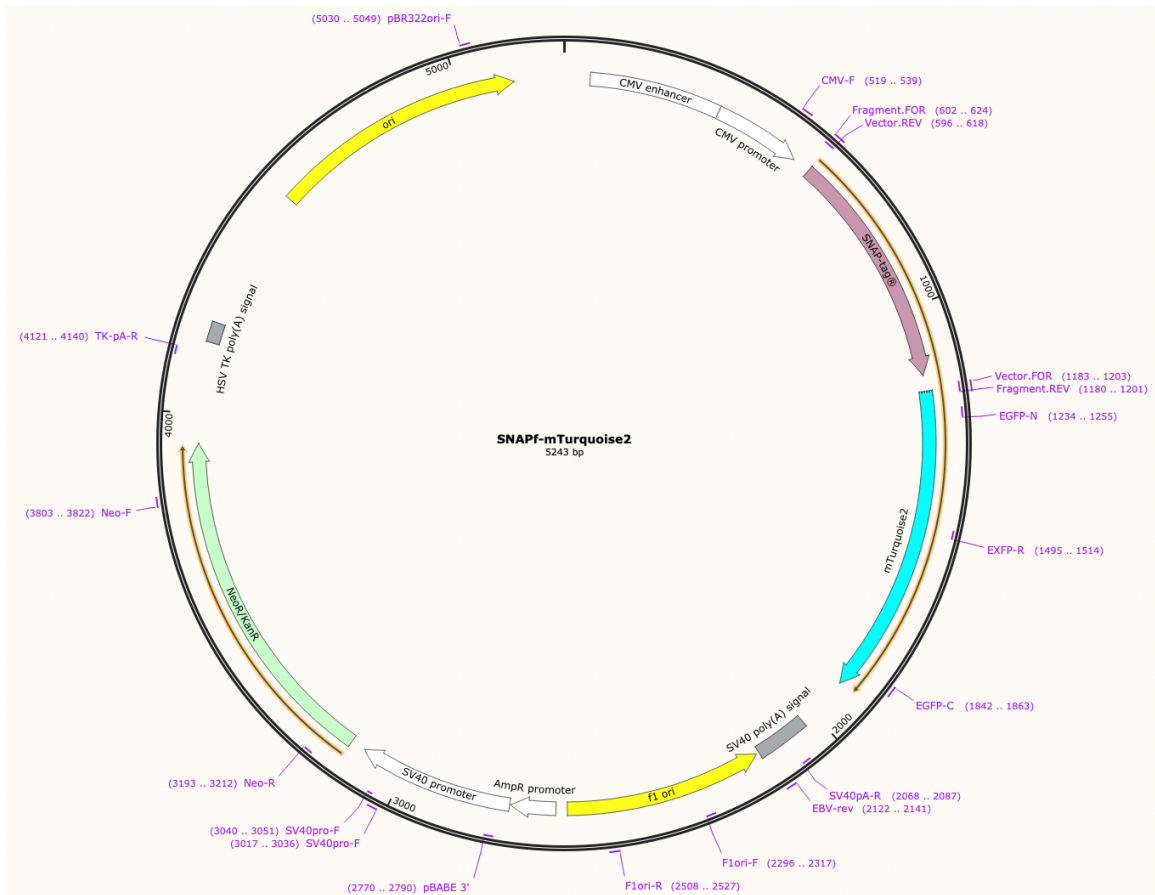

## LifeAct-SNAPf-mTurquoise2

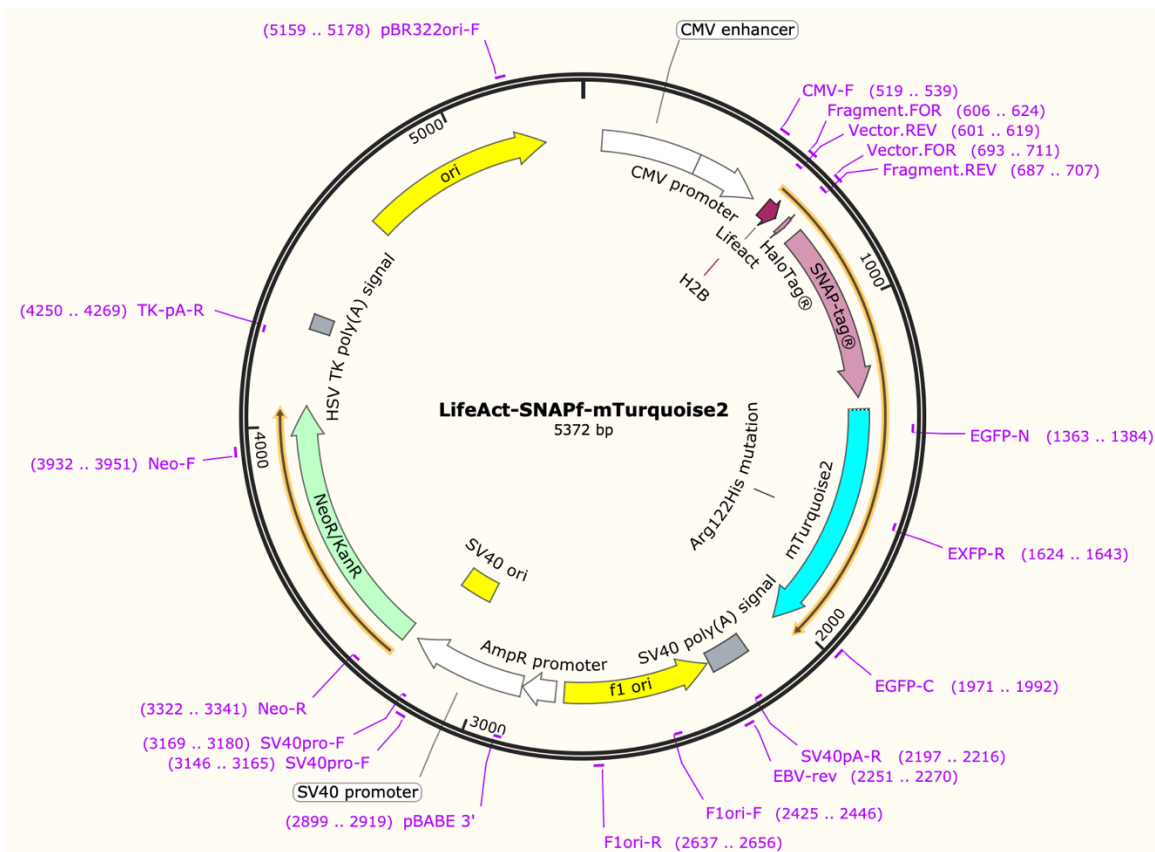

# TOM20-SNAPf-mTurquoise2

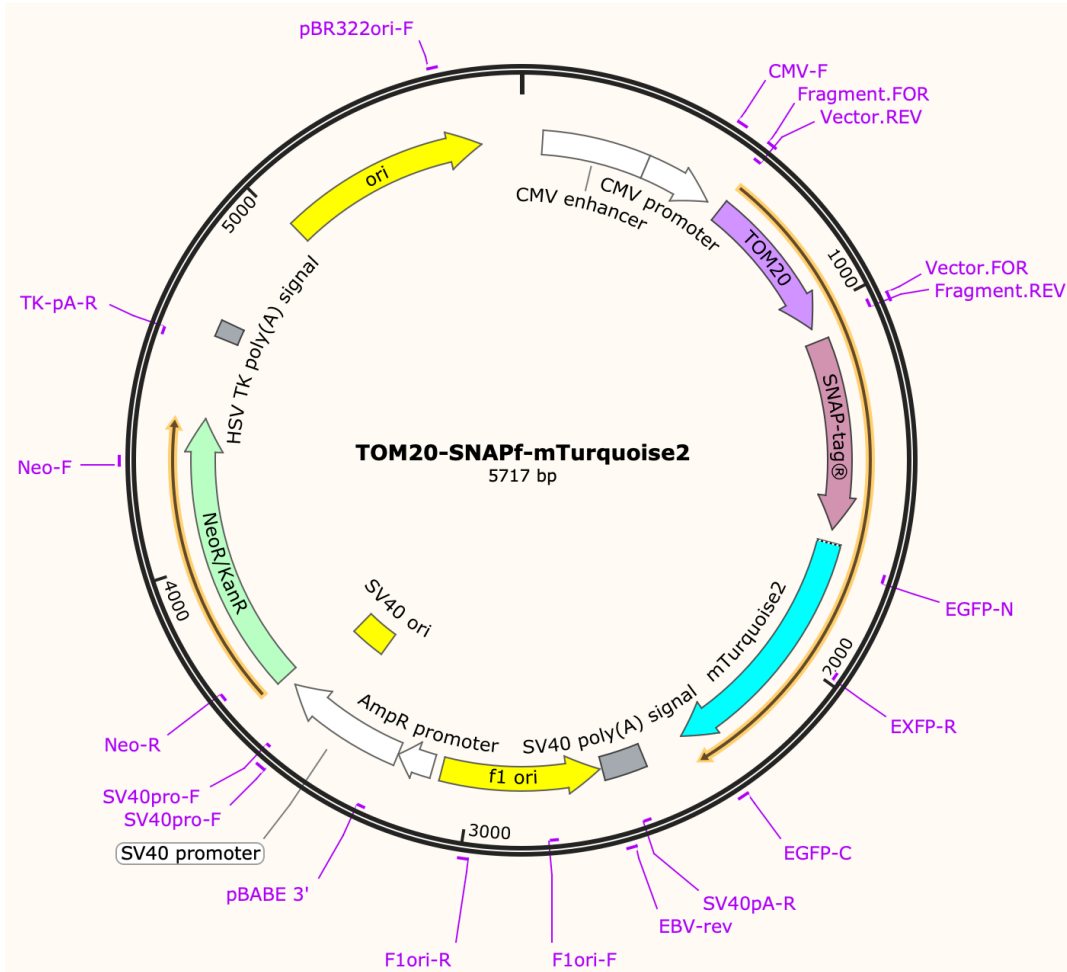

Supplement: 41557_2023_1367_MOESM1_ESM.pdf [file 41557_2023_1367_MOESM1_ESM.pdf]
